# Supplementary material for: Bugs and Brains, the Gut and Mental Health Study: a mixed-methods study investigating microbiota composition and function in anxiety, depression and irritable bowel syndrome
Source: PubMed Central journal article supplement — BMJ Open. 2021 Mar 15;11(3):e043221. doi: 10.1136/bmjopen-2020-043221 (PMC7970253; doi:10.1136/bmjopen-2020-043221), 2021-03-15
Supplement: bmjopen-2020-043221.draft_revisions.pdf [file bmjopen-2020-043221.draft_revisions.pdf]

# BMJ Open

BMJ Open is committed to open peer review. As part of this commitment we make the peer review history of every article we publish publicly available.

When an article is published we post the peer reviewers' comments and the authors' responses online. We also post the versions of the paper that were used during peer review. These are the versions that the peer review comments apply to.

The versions of the paper that follow are the versions that were submitted during the peer review process. They are not the versions of record or the final published versions. They should not be cited or distributed as the published version of this manuscript.

BMJ Open is an open access journal and the full, final, typeset and author-corrected version of record of the manuscript is available on our site with no access controls, subscription charges or pay-per-view fees (<http://bmjopen.bmj.com>).

If you have any questions on BMJ Open's open peer review process please email [info.bmjopen@bmj.com](mailto:info.bmjopen@bmj.com)

# BMJ Open

**Protocol: Bugs and Brains, the Gut and Mental Health Study  
- A mixed-methods study investigating microbiota  
composition and function in anxiety, depression and  
irritable bowel syndrome**

|                               |                                                                                                                                                                                                                                                                                                                                                                                                                                                                                                                                                                                                                                                                                                                                                                                                                                                                                                                                                                                                                                                                                                                                                                                                                                                                                                                                                                                                                                                                                                                                                                                                                                                                                                                                                                                                                                                                                                                                                                                                                                                                                                                                                                                                                                                                                                                           |
|-------------------------------|---------------------------------------------------------------------------------------------------------------------------------------------------------------------------------------------------------------------------------------------------------------------------------------------------------------------------------------------------------------------------------------------------------------------------------------------------------------------------------------------------------------------------------------------------------------------------------------------------------------------------------------------------------------------------------------------------------------------------------------------------------------------------------------------------------------------------------------------------------------------------------------------------------------------------------------------------------------------------------------------------------------------------------------------------------------------------------------------------------------------------------------------------------------------------------------------------------------------------------------------------------------------------------------------------------------------------------------------------------------------------------------------------------------------------------------------------------------------------------------------------------------------------------------------------------------------------------------------------------------------------------------------------------------------------------------------------------------------------------------------------------------------------------------------------------------------------------------------------------------------------------------------------------------------------------------------------------------------------------------------------------------------------------------------------------------------------------------------------------------------------------------------------------------------------------------------------------------------------------------------------------------------------------------------------------------------------|
| Journal:                      | <i>BMJ Open</i>                                                                                                                                                                                                                                                                                                                                                                                                                                                                                                                                                                                                                                                                                                                                                                                                                                                                                                                                                                                                                                                                                                                                                                                                                                                                                                                                                                                                                                                                                                                                                                                                                                                                                                                                                                                                                                                                                                                                                                                                                                                                                                                                                                                                                                                                                                           |
| Manuscript ID                 | bmjopen-2020-043221                                                                                                                                                                                                                                                                                                                                                                                                                                                                                                                                                                                                                                                                                                                                                                                                                                                                                                                                                                                                                                                                                                                                                                                                                                                                                                                                                                                                                                                                                                                                                                                                                                                                                                                                                                                                                                                                                                                                                                                                                                                                                                                                                                                                                                                                                                       |
| Article Type:                 | Protocol                                                                                                                                                                                                                                                                                                                                                                                                                                                                                                                                                                                                                                                                                                                                                                                                                                                                                                                                                                                                                                                                                                                                                                                                                                                                                                                                                                                                                                                                                                                                                                                                                                                                                                                                                                                                                                                                                                                                                                                                                                                                                                                                                                                                                                                                                                                  |
| Date Submitted by the Author: | 28-Jul-2020                                                                                                                                                                                                                                                                                                                                                                                                                                                                                                                                                                                                                                                                                                                                                                                                                                                                                                                                                                                                                                                                                                                                                                                                                                                                                                                                                                                                                                                                                                                                                                                                                                                                                                                                                                                                                                                                                                                                                                                                                                                                                                                                                                                                                                                                                                               |
| Complete List of Authors:     | <p>Simpson, Carra; The University of Melbourne Faculty of Medicine Dentistry and Health Sciences, Melbourne School of Psychological Sciences</p> <p>Schwartz, Orli; Orygen The National Centre of Excellence in Youth Mental Health, Centre for Youth Mental Health</p> <p>Eliby, Djamila; The University of Melbourne Faculty of Medicine Dentistry and Health Sciences, Melbourne School of Psychological Sciences; The University of Melbourne Faculty of Medicine Dentistry and Health Sciences, Melbourne Neuropsychiatry Centre</p> <p>Butler, Catherine; The University of Melbourne Faculty of Medicine Dentistry and Health Sciences, Centre for Oral Health Research, Melbourne Dental School, Bio21 Institute</p> <p>Huang, Katherine; The University of Melbourne Bio21 Molecular Science and Biotechnology Institute, Department of Biochemistry and Molecular Biology</p> <p>Simpson-O'Brien, Neil; The University of Melbourne Faculty of Medicine Dentistry and Health Sciences, Centre for Oral Health Research, Melbourne Dental School, Bio21 Institute</p> <p>Callaghan, Bridget; University of California Los Angeles, The Department of Psychology; The University of Melbourne Faculty of Medicine Dentistry and Health Sciences, Melbourne Neuropsychiatry Centre</p> <p>Dashper, Stuart; The University of Melbourne Faculty of Medicine Dentistry and Health Sciences, Centre for Oral Health Research, Melbourne Dental School, Bio21 Institute</p> <p>Gooley, Paul; The University of Melbourne Bio21 Molecular Science and Biotechnology Institute, Department of Biochemistry and Molecular Biology</p> <p>Whittle, Sarah; The University of Melbourne Faculty of Medicine Dentistry and Health Sciences, Melbourne Neuropsychiatry Centre; The University of Melbourne Faculty of Medicine Dentistry and Health Sciences, Melbourne School of Psychological Sciences</p> <p>Haslam, Nick; The University of Melbourne Faculty of Medicine Dentistry and Health Sciences, Melbourne School of Psychological Sciences</p> <p>Simmons, Julian; The University of Melbourne Faculty of Medicine Dentistry and Health Sciences, Melbourne School of Psychological Sciences; The University of Melbourne Faculty of Medicine Dentistry and Health Sciences, Melbourne Neuropsychiatry Centre</p> |

1  
2  
3  
4  
5  
6  
7  
8  
9  
10  
11  
12  
13  
14  
15  
16  
17  
18  
19  
20  
21  
22  
23  
24  
25  
26  
27  
28  
29  
30  
31  
32  
33  
34  
35  
36  
37  
38  
39  
40  
41  
42  
43  
44  
45  
46  
47  
48  
49  
50  
51  
52  
53  
54  
55  
56  
57  
58  
59  
60

|           |                                                                                                                                                   |
|-----------|---------------------------------------------------------------------------------------------------------------------------------------------------|
| Keywords: | MICROBIOLOGY, Anxiety disorders < PSYCHIATRY, Depression & mood disorders < PSYCHIATRY, Functional bowel disorders < GASTROENTEROLOGY, PSYCHIATRY |
|           |                                                                                                                                                   |

SCHOLARONE™  
Manuscripts

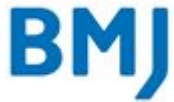

I, the Submitting Author has the right to grant and does grant on behalf of all authors of the Work (as defined in the below author licence), an exclusive licence and/or a non-exclusive licence for contributions from authors who are: i) UK Crown employees; ii) where BMJ has agreed a CC-BY licence shall apply, and/or iii) in accordance with the terms applicable for US Federal Government officers or employees acting as part of their official duties; on a worldwide, perpetual, irrevocable, royalty-free basis to BMJ Publishing Group Ltd ("BMJ") its licensees and where the relevant Journal is co-owned by BMJ to the co-owners of the Journal, to publish the Work in this journal and any other BMJ products and to exploit all rights, as set out in our [licence](#).

The Submitting Author accepts and understands that any supply made under these terms is made by BMJ to the Submitting Author unless you are acting as an employee on behalf of your employer or a postgraduate student of an affiliated institution which is paying any applicable article publishing charge ("APC") for Open Access articles. Where the Submitting Author wishes to make the Work available on an Open Access basis (and intends to pay the relevant APC), the terms of reuse of such Open Access shall be governed by a Creative Commons licence – details of these licences and which [Creative Commons](#) licence will apply to this Work are set out in our licence referred to above.

Other than as permitted in any relevant BMJ Author's Self Archiving Policies, I confirm this Work has not been accepted for publication elsewhere, is not being considered for publication elsewhere and does not duplicate material already published. I confirm all authors consent to publication of this Work and authorise the granting of this licence.

1  
2  
3 **Protocol: Bugs and Brains, the Gut and Mental Health Study - A mixed-methods study**  
4 **investigating microbiota composition and function in anxiety, depression and irritable**  
5 **bowel syndrome**  
6  
7

8  
9  
10 Carra A. Simpson<sup>1,2</sup>, Orli S. Schwartz<sup>3</sup>, Djamila Eliby<sup>1,2</sup>, Catherine A. Butler<sup>4</sup>, Katherine  
11 Huang<sup>5</sup>, Neil O'Brien-Simpson<sup>4</sup>, Bridget L. Callaghan<sup>2,6</sup>, Stuart G. Dashper<sup>4</sup>, Paul R. Gooley<sup>5</sup>,  
12 Sarah Whittle<sup>1,2</sup>, Nick Haslam<sup>1</sup>, & Julian G. Simmons<sup>1,2</sup>  
13  
14

15  
16  
17  
18 <sup>1</sup> Melbourne School of Psychological Sciences, Faculty of Medicine, Dentistry and Health  
19 Sciences, The University of Melbourne, VIC, 3010, Australia.  
20

21  
22 <sup>2</sup> Melbourne Neuropsychiatry Centre, Department of Medicine, Faculty of Medicine, Dentistry  
23 and Health Sciences, The University of Melbourne and Melbourne Health, VIC, 3010, Australia.  
24

25  
26  
27 <sup>3</sup> Orygen, The National Centre of Excellence in Youth Mental Health; Centre for Youth Mental  
28 Health, The University of Melbourne, VIC, 3010, Australia.  
29

30  
31 <sup>4</sup> Centre for Oral Health Research, Melbourne Dental School, Bio21 Institute, The University of  
32 Melbourne, VIC, 3010, Australia  
33

34  
35  
36 <sup>5</sup> Department of Biochemistry and Molecular Biology, Bio21 Molecular Science and  
37 Biotechnology Institute, University of Melbourne, VIC, 3010, Australia  
38

39  
40 <sup>6</sup> The Department of Psychology, The University of California, Los Angeles, 90503  
41

42  
43 **Correspondence:** Carra A. Simpson, <https://orcid.org/0000-0002-8281-5881>  
44

45 Melbourne School of Psychological Sciences, 12th floor Redmond Barry Building, The  
46 University of Melbourne, Parkville, VIC 3010, Australia.  
47

48  
49 Email: [carra.simpson@unimelb.edu.au](mailto:carra.simpson@unimelb.edu.au), Phone: +61 03 8344 1845  
50

51  
52 **Declarations of interest:** None  
53  
54  
55  
56  
57  
58  
59  
60

## Abstract

**Introduction:** Research has highlighted the relationship between the microorganisms that inhabit our gastrointestinal tract (oral and gut microbiota) with host mood and gastrointestinal functioning. Mental health disorders and functional gastrointestinal disorders co-occur at high rates, although the mechanisms underlying these associations remain unclear. The Bugs and Brains study aims to investigate the complex relationships between anxiety/depression and irritable bowel syndrome (IBS) in two ways. Firstly, its primary component will compare the gut and oral microbiota in females with anxiety/depression and/or IBS relative to controls, and investigate underlying physiological, endocrine, and immune factors, as well as interactions with diet and psychosocial factors. In an ancillary component, the study will also investigate gastrointestinal and mental health symptoms in a larger sample, and explore relationships with diet, medical history, and psychosocial factors. **Methods and analysis:** The Bugs and Brains study aims to recruit 160 females to the primary component: i) 40 controls; ii) 40 participants with a depressive/anxiety disorder, but no IBS; iii) 40 participants with IBS, but no depressive/anxiety disorder; and iv) 40 participants with both depressive/anxiety disorder and IBS. Participation is completed within one month, and involves comprehensive questionnaires, anthropometrics, a diagnostic clinical interview, collection of two saliva samples, and stool, urine, and hair samples. This study aims to use a systems biology approach to characterise oral and gut microbial composition and function using 16S rRNA gene sequencing and nuclear magnetic resonance spectroscopy. As part of the ancillary component, it will collect questionnaire data from 1000 females aged 18-40 years, capturing mental health, gastrointestinal health, oral health, diet, and psychosocial factors. **Ethics and dissemination:** Approval was granted by the University of Melbourne Human Research Ethics Committee (#1749221). All participants voluntarily provided informed consent. Results will be published in peer-reviewed journals and presented at scientific conferences.

*Keywords:* Gut microbiota, microbiome, depression, anxiety, irritable bowel syndrome

## Article summary

### *Strengths and limitations*

- The Bugs and Brains study will compare oral and gut microbiota composition and function using next generation sequencing and nuclear magnetic resonance spectroscopy in individuals with anxiety/depression, IBS, both anxiety/depression and IBS, and controls, as defined by clinical diagnosis and strict inclusion criteria.
- It will assess medical history, gastrointestinal health, early life adversity, mental and physical health symptoms using detailed questionnaires and clinical interview, and investigate associations between symptoms, microbiota, metabolome, and the immune and endocrine systems.
- It will also investigate gastrointestinal and mental health symptoms in a large sample, and examine relationships between diet, medical history, and early life adversity.
- Future research should investigate these associations using shotgun metagenomics, examine relationships longitudinally to disentangle causes and effects, and extend investigations to male participants.

## Introduction

Microorganisms have co-existed with humans throughout our evolution, with between 20 and 30 trillion microbial cells occupying ecological niches within and upon the human body. It is therefore unsurprising that bacteria residing throughout the gastrointestinal (GI) tract are implicated in host endocrine, immune, and nervous system functioning [1]. Microbes produce neuroactive compounds, including catecholamines (e.g., noradrenaline, dopamine), GABA, histamine, serotonin, and acetylcholine, each of which plays a critical role in human physiological functioning [1,2]. Multiple GI bacterial genera and their metabolic products also facilitate peristaltic waves to aid with digestion [3], contribute to fermentation of dietary carbohydrates, maintain host membrane function, and produce essential amino acids and vitamins [2,4]. Resident bacterial species also prime the immune system in the early stages of life, teaching our bodies what is ‘foreign’ rather than commensal [2]. The gut microbiota (i.e., the collection of microorganisms in the GI tract) is therefore essential to normal development.

As we come to appreciate the essential role microorganisms play in host physiology, so too have we opened a novel direction for investigation in conditions with no current clear aetiology. Among these are irritable bowel syndrome (IBS), depression and anxiety disorders. IBS is the most common functional GI disorder, affecting 7 to 21% of individuals worldwide [5]. Similarly, depression remains the highest contributor to non-fatal health burden, and approximately 264 million individuals live with an anxiety disorder globally [6]. These three conditions frequently co-occur [7]: approximately 84% of patients with IBS also have a depressive disorder and 44% an anxiety disorder [8,9]. Moreover, 45% of participants with anxiety and 30% of participants with a depressive disorder develop IBS [7,10,11]. The mechanisms underlying this comorbidity remain unclear.

The complex interplay between host physiology and microbiota promises novel insight into these conditions. Research has revealed that anxiety, depression and IBS share several gut microbial alterations, including decreased overall microbial diversity and a higher relative abundance of pro-inflammatory and toxigenic species [12–15]. Moreover, research indicates alterations may exist along a continuum, in that participants with comorbid depression and IBS have gut microbiota alterations simply more pronounced than those presenting with one disorder alone, including higher Proteobacteria, *Prevotella/Prevotellaceae*, *Bacteroides* and lower *Lachnospiraceae* [10,16–18]. These implicated taxa further build on the evidence of altered



1  
2  
3 microbial and host immune system interactions, as taxa reported to have a higher relative  
4 abundance in anxiety, depression and IBS are associated with inflammation, whereas a loss of  
5 species that secrete anti-inflammatory metabolic products has also been observed [14]. No  
6 studies have compared the gut microbiota of participants with anxiety relative to IBS, although  
7 studies have identified microbiota-related correlates between anxiety symptoms among IBS  
8 patients [18–21].  
9

10  
11  
12  
13 Although research in this area has primarily investigated the composition of the gut  
14 microbiota, the entire length of the GI tract harbours resident microorganisms. The oral  
15 microbiota is the second most diverse community in the body following the gut [22], and  
16 research indicates that microbial representation in the oral cavity is predictive of the composition  
17 in the lower GI tract [23]. Consistently, oral bacteria can translocate throughout the body, with  
18 significant effects on GI and systemic health [24]. Although no known studies have examined  
19 the oral microbiota in clinical anxiety, depression or IBS, its known association with host  
20 physiology (i.e., immune and endocrine functioning [22]) warrants investigation.  
21  
22  
23  
24  
25  
26

27  
28 Several confounding factors have been neglected in the small literature investigating the  
29 microbiota in IBS, anxiety and depression. Severity and type of IBS symptoms interact with gut  
30 microbial composition [15,18,25], as may use of anti-depressants/anxiolytic medication [26].  
31 Diet and its interaction with psychosocial factors also act as sources of gut microbiota  
32 composition variation [27,28], which has also been inadequately considered. The extant literature  
33 has not often employed gold-standard diagnostic measures, including clinical psychological  
34 interviews, and has examined microbial composition but neglected microbial function [25].  
35  
36  
37  
38

### 39 **Aims and objectives**

40  
41 The Bugs and Brains study aims to characterise the microbial and physiological profiles  
42 in anxiety, depression, and IBS; to understand interactions between symptoms and confounding  
43 variables; and, to investigate varied contributors to disorder presentation (both across and within  
44 disorders). In this primary case-control component, key questions relate to the similarities and  
45 differences across bacterial, metabolic, endocrine, and immune indices, in a well-controlled  
46 cohort. In a large ancillary questionnaire-only component, this research will also investigate how  
47 GI and mental health symptoms are associated with diet, exercise, oral health, substance use,  
48 medical history, and psychosocial factors. Possible sources of inter-study variation in previous  
49 investigations will be considered (i.e., symptom severity, medication use, diet). Understanding  
50  
51  
52  
53  
54  
55  
56  
57  
58  
59  
60

1  
2  
3 shared and distinct microbiota relationships in IBS, anxiety and depression has implications in  
4 resolving the directionality of co-morbidity, and in informing future targeted clinical  
5 interventions.  
6  
7

## 8 **Methods and analysis**

### 9 **Participants**

#### 10 ***Primary case-control component***

11  
12 Females aged 18 to 40 will be assessed for participation in all phases of the study. The  
13 primary case-control component will include 160 community-based female volunteers aged 18 to  
14 40 meeting eligibility criteria for one of four groups:  
15  
16  
17

- 18 i) 40 controls
  - 19 ii) 40 participants with a depressive/anxiety disorder, but no IBS
  - 20 iii) 40 participants with IBS, but no depressive/anxiety disorder; and
  - 21 iv) 40 participants with depressive/anxiety disorder and IBS
- 22  
23  
24  
25  
26

27 The study chose to recruit only participants of the female sex due to significantly elevated rates  
28 of all three conditions relative to biological males [6,29]. Sex is also an identified source of inter-  
29 study variation in microbiota research [30]. All participants are being recruited through online  
30 and printed advertisements at the University of Melbourne and using paid Facebook ads. All  
31 participants must demonstrate the capacity to provide informed consent and adequate  
32 comprehension of English.  
33  
34  
35  
36  
37

#### 38 ***Ancillary questionnaire-only component***

39 To investigate associations in a larger sample, the ancillary component aims to collect  
40 questionnaire data from 1000 females aged 18 to 40, capturing mental health, diet, exercise,  
41 gastrointestinal health, oral health, substance use, medical history, emotion regulation, stress,  
42 early life adversity, and medical history.  
43  
44  
45  
46

#### 47 **Inclusion criteria for the case-control component**

48 Participants in the primary component are required to live in Greater Melbourne or  
49 Geelong (unless willing to travel to the site of sample collection: Melbourne, Australia).  
50 Inclusion and exclusion criteria are presented in Table 1. All participants initially complete the  
51 Phase 1 screening questionnaire to assess their likely eligibility for one of the four groups. If  
52 participants meet screening criteria, they are invited to take part in a psychiatric diagnostic  
53  
54  
55  
56  
57  
58  
59  
60

1  
2  
3 interview to confirm eligibility (Phase 2). All ineligible participants, including those who prefer  
4 not to complete sample collection, are invited to complete the ancillary questionnaire-only  
5 component.  
6  
7

### 8 9 ***Depression and anxiety group***

10 Participants in this group must meet current diagnostic criteria for at least one of six  
11 depressive and/or anxiety disorders, as assessed by the Structured Clinical Interview for DSM-5  
12 Research Version (SCID-5-RV; [31]) at Phase 2. Specific disorders for inclusion are: Major  
13 Depressive Disorder, Persistent Depressive Disorder, Social Anxiety Disorder, Panic Disorder,  
14 Agoraphobia, and Generalized Anxiety Disorder. Participants with a co-morbid Specific Phobia,  
15 Obsessive-Compulsive or Related Disorder, Trauma- or Stressor-Related Disorder, Sleep  
16 Disorder, and/or Externalizing Disorder, as assessed in the SCID-5-RV, are included if they also  
17 meet criteria for one of the six target disorders. Participants in this group must have no lifetime  
18 history of IBS and must not meet current diagnostic criteria for IBS or another FGID.  
19  
20  
21  
22  
23  
24  
25

### 26 ***Irritable bowel syndrome group***

27  
28 Participants must meet current criteria for IBS, as assessed by the Rome IV during Phase  
29 1 screening questionnaires [32,33]. The Rome IV assesses gastrointestinal symptom duration and  
30 delineates diagnosis by the prominent altered stool type: constipation (IBS-C), diarrhoea (IBS-  
31 D), mixed (IBS-M), or an unspecified dominance (IBS-U). Participants in this group must not  
32 meet current or past (i.e., lifetime) diagnostic criteria for any of the DSM-5 disorders mentioned  
33 above (including Specific Phobia, etc).  
34  
35  
36  
37

### 38 ***Comorbid irritable bowel syndrome and anxiety/depression group***

39  
40 Consistent with measures outlined above, participants must currently meet criteria for  
41 IBS and diagnosis of at least one of the six primary anxiety and/or depressive disorders.  
42  
43

### 44 ***Control group***

45 Participants in this group must have no lifetime history of IBS, must not meet current  
46 diagnostic criteria for IBS or another FGID, and must not meet lifetime diagnostic criteria for  
47 any of the DSM-5 disorders mentioned above (i.e., current or past).  
48  
49  
50

### 51 **Exclusion criteria for the primary case-control component (all groups)**

#### 52 ***Physical health***

53  
54 Participants are excluded from all groups if they report or present with current obesity,  
55  
56  
57  
58  
59  
60

1  
2  
3 hypertension, cardiovascular disease, respiratory disease, diabetes mellitus, liver cirrhosis, fatty  
4 liver disease, inflammatory bowel disease, coeliac disease, other autoimmune disease, short  
5 bowel syndrome, or a history of abdominal surgery that involved cutting into the GI tract.  
6  
7 Participants who report daily cigarette smoking, a recent colonoscopy (past 12 months), who are  
8 pregnant/lactating are also excluded.  
9

### 10 11 ***Mental health***

12  
13 Participants are excluded if they report a lifetime history or present with a clinical  
14 psychotic symptom or disorder, Bipolar Disorder, Somatic Symptom or Related Disorder, or  
15 over the past 12 months meet criteria for a Feeding and Eating Disorder or an Alcohol or  
16 Substance Use Disorder (at Phase 1 questionnaires or Phase 2 SCID-5 interview).  
17  
18

### 19 20 ***Medication***

21  
22 Participants are excluded if they report use of anti-depressant or anti-anxiety medications,  
23 other psychotropics, steroids, probiotics, prebiotics or synbiotics in the past four weeks. They are  
24 also excluded if they report a current bacterial, fungal, or viral infection, or use of non-steroidal  
25 anti-inflammatory drugs or antifungal medications in the past two weeks. Specific diets may be  
26 used to alleviate GI symptoms (e.g., FODMAP exclusion, casein-free), and therefore participants  
27 without IBS are excluded if they are following a restrictive diet (i.e., do not meet criteria,  
28 potentially due to dietary reduction of symptoms).  
29  
30  
31  
32  
33

### 34 35 **Inclusion criteria for the ancillary questionnaire-only component**

36 Females aged 18-40 who are ineligible for the primary case-control component or elect  
37 not to collect biological samples are invited to complete a set of questionnaires that comprise the  
38 ancillary questionnaire-only component. No strict eligibility criteria apply, although all  
39 participants are required to demonstrate the capacity to provide informed consent and adequate  
40 comprehension of written and spoken English. All participants in the case-control component  
41 complete the same questionnaires. The phases of participation in the Bugs and Brains study are  
42 presented in Figure 1.  
43  
44  
45  
46  
47  
48  
49  
50  
51  
52  
53  
54  
55  
56  
57  
58  
59  
60

**Table 1.** Inclusion criteria for full participation in the Bugs and Brains study (i.e., primary case-control component)

| Inclusion criteria                                                                                  | Controls | Depression/Anxiety | IBS | Depression/Anxiety and IBS |
|-----------------------------------------------------------------------------------------------------|----------|--------------------|-----|----------------------------|
| Female sex                                                                                          | ✓        | ✓                  | ✓   | ✓                          |
| Fluent in English                                                                                   | ✓        | ✓                  | ✓   | ✓                          |
| Capacity to provide consent                                                                         | ✓        | ✓                  | ✓   | ✓                          |
| Live in Melbourne or Geelong (Australia)                                                            | ✓        | ✓                  | ✓   | ✓                          |
| Meet DSM-5 criteria for current Depression or Anxiety disorder*                                     | X        | ✓                  | X   | ✓                          |
| OCD, specific phobia, Trauma- or stressor-related disorder, Sleep Disorder, Externalizing disorders | X        | -                  | X   | -                          |
| Irritable bowel syndrome (Rome IV)                                                                  | X        | X                  | ✓   | ✓                          |

Notes. ✓= inclusion criteria; X= exclusion criteria (current or lifetime history [as assessed by SCID-5-RV]); - = neither exclusion nor inclusion; \* Specific disorders for inclusion are: Major Depressive Disorder, Persistent Depressive Disorder, Social Anxiety Disorder, Panic Disorder, Agoraphobia, and Generalized Anxiety Disorder as assessed by the Structured Clinical Interview for the Diagnostic and Statistical Manual fifth edition, research version (SCID-5-RV)

[INSERT FIGURE 1 HERE]

*Figure 1.* Phases of participation in the Bugs and Brains study. Participants eligible for the primary case-control component at Phases 1 and 2 complete all phases of the study within a month, including biological sample collection ( $N = 160$ ;  $n = 40$  with IBS,  $n = 40$  with anxiety and/or depressive disorder,  $n = 40$  with IBS and anxiety and/or depressive disorder,  $n = 40$  controls with no lifetime history of either IBS or an anxiety/depressive disorder). Participants who decline sample collection or are not eligible for the primary component complete the questionnaire-only ancillary component (Phases 1 and 4;  $N = 1000$ ). GAF = Global Assessment of Functioning; IBS = irritable bowel syndrome; SOFAS = Social and Occupational Functioning Assessment Scale; Structured Clinical Interview for the Diagnostic and Statistical Manual (DSM) 5<sup>th</sup> edition (Research version [SCID-5-RV]). Created with BioRender.com.

## **Phases of participation**

### ***Phase 1 - screening questionnaire (all participants)***

Participants who provide informed consent are sent a Phase 1 questionnaire link online, using the Qualtrics platform. This component takes approximately 20 minutes and comprises a brief demographic overview, the Psychiatric Diagnostic Screening Questionnaire (PDSQ; [34]), and the Rome IV IBS module [32]. It also captures participants' regular diet category (e.g., omnivore, low FODMAP), medication/supplements use, and alcohol/substance use. Eligible participants are invited for further Phase 2 screening. Excluded participants, or those who decline Phases 2 or 3, are invited to complete Phase 4 questionnaires as part of the ancillary component, (bypassing Phases 2 and 3).

### ***Phase 2 - assessment of current and past mental health diagnoses (SCID-5; case-control component only)***

Participants invited for the primary case-control component are administered the SCID-5-RV [31] to further assess eligibility. Interviews are conducted in-person at the University of Melbourne or online via a video application. Trained interviewers administer a modified version of the SCID-5-RV to assess the inclusion and exclusion psychiatric disorders displayed in Table

1  
2  
3 2. The interviewer then assesses functioning using the Global Assessment of Functioning (GAF)  
4 and Social and Occupational Functioning Assessment Scale (SOFAS) [35]. Fortnightly clinical  
5 meetings are conducted with the research clinical psychologist (OS) to maintain interviewer  
6 consistency and discuss any risks presented by participants. All interviewers are trained in  
7 psychological interviewing and are required to complete Management of Clinical Aggression  
8 training (MOCA) [36] and Applied Suicide Intervention Skills Training (ASIST). Interrater  
9 reliability will be conducted for at least 20% of interviews from eligible participants.  
10  
11  
12  
13  
14  
15  
16  
17  
18  
19  
20  
21  
22  
23  
24  
25  
26  
27  
28  
29  
30  
31  
32  
33  
34  
35  
36  
37  
38  
39  
40  
41  
42  
43  
44  
45  
46  
47  
48  
49  
50  
51  
52  
53  
54  
55  
56  
57  
58  
59  
60

**Table 2.** Disorders assessed by the modified SCID-5-RV utilised by the Bugs and Brains study

| Disorder                                             | Duration assessed at interview        | Eligibility Status                                                                                                                                       |
|------------------------------------------------------|---------------------------------------|----------------------------------------------------------------------------------------------------------------------------------------------------------|
| <u>Bipolar and related disorders</u>                 |                                       |                                                                                                                                                          |
| Bipolar I Disorder                                   | Lifetime and past month (current)     | } X Exclusion (all groups)                                                                                                                               |
| Bipolar II Disorder                                  | Lifetime and past month (current)     |                                                                                                                                                          |
| Cyclothymic Disorder                                 | Past 2 years (current)                |                                                                                                                                                          |
| Other Specified Bipolar Disorder                     | Lifetime and past month (current)     |                                                                                                                                                          |
| Bipolar Disorder Due to Another Medical Condition    | Lifetime and past month (current)     |                                                                                                                                                          |
| Substance/Medication-Induced Bipolar Disorder        | Lifetime and past month (current)     |                                                                                                                                                          |
| <u>Depressive disorders</u>                          |                                       |                                                                                                                                                          |
| Major Depressive Disorder                            | Lifetime and past month (current)     | } ✓ Current = Inclusion (MH and Comorbid)<br>- Lifetime = Neither inclusion nor exclusion (MH and Comorbid)<br>X Lifetime = Exclusion (Controls and IBS) |
| Persistent Depressive Disorder                       | Lifetime and past two years (current) |                                                                                                                                                          |
| Premenstrual Dysphoric Disorder                      | Past 12 months (current)              |                                                                                                                                                          |
| Other Specified Depressive Disorder                  | Lifetime and past month (current)     | } - Lifetime = Neither inclusion nor exclusion (MH and Comorbid)<br>X Lifetime = Exclusion (Controls and IBS)                                            |
| Depressive Disorder Due to Another Medical Condition | Lifetime and past month (current)     |                                                                                                                                                          |
| Substance/Medication-Induced Depressive Disorder     | Lifetime and past month (current)     |                                                                                                                                                          |
| <u>Schizophrenia and other psychotic disorders</u>   |                                       |                                                                                                                                                          |
| Clinical psychotic symptoms                          | Lifetime and current                  | } X Exclusion (all groups)                                                                                                                               |
| <u>Substance use disorders</u>                       |                                       |                                                                                                                                                          |
| Alcohol                                              | Past 12 months (current)              | } X Exclusion (all groups)                                                                                                                               |
| Sedative-Hypnotic-Anxiolytic                         | Past 12 months (current)              |                                                                                                                                                          |



| Disorder                                                                   | Duration assessed at interview         | Eligibility Status                                                                                                                                       |
|----------------------------------------------------------------------------|----------------------------------------|----------------------------------------------------------------------------------------------------------------------------------------------------------|
| Cannabis                                                                   | Past 12 months (current)               | }                                                                                                                                                        |
| Stimulants/Cocaine                                                         | Past 12 months (current)               |                                                                                                                                                          |
| Opioids                                                                    | Past 12 months (current)               |                                                                                                                                                          |
| Phencyclidine (PCP)                                                        | Past 12 months (current)               |                                                                                                                                                          |
| Other Hallucinogens                                                        | Past 12 months (current)               |                                                                                                                                                          |
| Inhalants                                                                  | Past 12 months (current)               |                                                                                                                                                          |
| Other/Unknown                                                              | Past 12 months (current)               |                                                                                                                                                          |
| <u>Anxiety disorders</u>                                                   |                                        |                                                                                                                                                          |
| Panic Disorder                                                             | Lifetime and past month (current)      | } ✓ Current = Inclusion (MH and Comorbid)<br>- Lifetime = Neither inclusion nor exclusion (MH and Comorbid)<br>✗ Lifetime = Exclusion (Controls and IBS) |
| Agoraphobia                                                                | Lifetime and past six months (current) |                                                                                                                                                          |
| Social Anxiety Disorder                                                    | Lifetime and past six months (current) |                                                                                                                                                          |
| Generalized Anxiety Disorder                                               | Lifetime and past six months (current) |                                                                                                                                                          |
| <u>Specific Phobia</u>                                                     |                                        |                                                                                                                                                          |
| Specific Phobia                                                            | Lifetime and past six months (current) | } - Lifetime = Neither inclusion nor exclusion (MH and Comorbid)<br>✗ Lifetime = Exclusion (Controls and IBS)                                            |
| Other Specified Anxiety Disorder                                           | Lifetime and past month (current)      |                                                                                                                                                          |
| Anxiety Disorder Due to Another Medical Condition                          | Lifetime and past month (current)      |                                                                                                                                                          |
| Substance/Medication-Induced Anxiety Disorder                              | Lifetime and past month (current)      |                                                                                                                                                          |
| <u>Obsessive-compulsive and related disorders</u>                          |                                        |                                                                                                                                                          |
| Obsessive Compulsive Disorder                                              | Lifetime and past month (current)      | } - Lifetime = Neither inclusion nor exclusion (MH and Comorbid)<br>✗ Lifetime = Exclusion (Controls and IBS)                                            |
| Other Specified Obsessive Compulsive and Related Disorder                  | Lifetime and past month (current)      |                                                                                                                                                          |
| Obsessive-Compulsive and Related Disorder Due to Another Medical Condition | Lifetime and past month (current)      |                                                                                                                                                          |
| Substance/Medication-Induced Obsessive-Compulsive and Related Disorder     | Lifetime and past month (current)      |                                                                                                                                                          |

| Disorder                                              | Duration assessed at interview             | Eligibility Status                                               |
|-------------------------------------------------------|--------------------------------------------|------------------------------------------------------------------|
| <u>Sleep-wake disorders</u>                           |                                            |                                                                  |
| Insomnia Disorder                                     | Past three months (current)                | } - Lifetime = Neither inclusion nor exclusion (MH and Comorbid) |
| Hypersomnolence Disorder                              | Past three months (current)                |                                                                  |
| Substance-Induced Sleep Disorder                      | Past three months (current)                |                                                                  |
| <u>Feeding and Eating Disorders</u>                   |                                            |                                                                  |
| Anorexia Nervosa                                      | Past 12 months and past 3 months (current) | } X Exclusion (all groups)                                       |
| Bulimia Nervosa                                       | Past 12 months and past 3 months (current) |                                                                  |
| Binge Eating Disorder                                 | Past 12 months and past 3 months (current) |                                                                  |
| Other Specified Feeding or Eating Disorder            | Past 12 months and past 3 months (current) |                                                                  |
| <u>Somatic Symptom and Related Disorders</u>          |                                            |                                                                  |
| Somatic Symptom Disorder                              | Past 6 months (current)                    | } X Exclusion (all groups)                                       |
| Illness Anxiety Disorder                              | Past 6 months (current)                    |                                                                  |
| <u>Externalizing Disorders</u>                        |                                            |                                                                  |
| Adult Attention-deficit Hyperactivity Disorder        | Past 6 months (current)                    | } - Lifetime = Neither inclusion nor exclusion (MH and Comorbid) |
|                                                       |                                            | X Lifetime = Exclusion (Controls and IBS)                        |
| <u>Trauma- and Stressor-Related Disorders</u>         |                                            |                                                                  |
| Acute Stress Disorder                                 | Past month (current)                       | } - Lifetime = Neither inclusion nor exclusion (MH and Comorbid) |
| Posttraumatic Stress Disorder                         | Lifetime and past month (current)          |                                                                  |
| Adjustment Disorder                                   | Past 6 months (current)                    |                                                                  |
| Other Specified Trauma- and Stressor-Related Disorder | Lifetime and past month (current)          |                                                                  |

Notes. MH = mental health anxiety/depression group; Comorbid = comorbid IBS and anxiety/depression group; IBS = irritable bowel syndrome

### ***Phase 3 - sample collection and anthropometrics (case-control component only)***

At Phase 3, participants collect biological samples in their own home. Instructions are provided verbally during a telephone call and included in written form with the collection kits. On day one, a stool sample is collected; on day two, a urine sample (first urination) and saliva sample are collected on awakening; on day three, another saliva sample is collected on awakening. Instructions on sterile storage are provided, and samples are immediately placed in participants' freezers following collection. A home visit is scheduled to pick up the biological samples, collect the hair sample, and take anthropometric measurements (height, weight and waist circumference), ideally within one week of collection. Samples are then transported on ice to the university and stored at -80 °C until processing.

**Faecal sample.** Participants collect a faecal sample at their first bowel movement of their chosen day, but not if they are menstruating or sick. Participants are asked to wait at least three days after they cease menses to begin collection, and to not collect samples within one week of menstruation. They are asked to consume a diet 'normal for them' for at least two weeks prior. Approximately 2.5 g is collected into sterile faecal collection containers. Participants are instructed not to collect the faecal sample if they have very loose stools, and to wait until they return to 'normal' (for them), or to a firmer state (i.e., Bristol stool chart type 5 or 6, if diarrhoea is frequent).

**Urine sample.** A mid-stream urine sample of approximately 10 to 20 ml is collected into sterile urine specimen containers at first urination on the morning the day after collection of the faecal sample.

**Saliva sample.** Participants collect (by passive drool) a total of two 3 ml saliva samples, one per day across two days, into Techno Plas 10 ml sterile centrifuge tubes. The first saliva sample is collected on awakening, and before eating or drinking, the morning of day 2 (day following collection of the faecal sample). The second saliva sample is collected on awakening the following morning on day 3. Participants are asked to complete a brief saliva record form.

**Hair sample.** A hair sample is collected by researchers at participants' homes. Hair sampling is carried out by combing and pinning the surrounding hair with clips, such that a 2 cm long by 0.5 cm wide scalp area is isolated on the posterior vertex (back of the head below the inion; ~1 cm<sup>2</sup>). Hair is then bound together (marking the scalp end) and cut with blunt-nose scissors as close to the scalp as possible.

1  
2  
3 ***Phase 4 - additional questionnaire data (all participants)***  
4

5 Participants in the primary case-control component of the study receive the Phase 4  
6 questionnaires online, via the Qualtrics platform. Phase 4 questionnaires are completed within 24  
7 hours of faecal collection. Participants in the ancillary questionnaire-only study complete Phase  
8 4 questionnaires following Phase 1 (or whichever phase they are excluded from the case-control  
9 component/decline to participate). The Phase 4 questionnaires (see Table 3) cover demographic  
10 information (e.g., country of birth), early life history (e.g., mode of birth, breastfeeding), history  
11 of gastric infections, and scales assessing psychopathology symptoms, stressful life events, early  
12 life adversity, diet, emotion regulation, and oral and physical health. The Phase 4 questionnaires  
13 take approximately 60 min.  
14  
15  
16  
17  
18  
19  
20  
21  
22  
23  
24  
25  
26  
27  
28  
29  
30  
31  
32  
33  
34  
35  
36  
37  
38  
39  
40  
41  
42  
43  
44  
45  
46  
47  
48  
49  
50  
51  
52  
53  
54  
55  
56  
57  
58  
59  
60

**Table 3.** Summary of questionnaire measures included in the Bugs and Brains study

| Category                                | Questionnaire                                                                                                                                                                                                                                                                                         | Phase 1<br>(Screening<br>questionnaire) | Phase 2<br>(SCID-5-RV<br>interview) | Phase 4<br>(During sample<br>collection) |
|-----------------------------------------|-------------------------------------------------------------------------------------------------------------------------------------------------------------------------------------------------------------------------------------------------------------------------------------------------------|-----------------------------------------|-------------------------------------|------------------------------------------|
| <b>Demographic information</b>          | Phase 1 Health Questionnaire*                                                                                                                                                                                                                                                                         | ✓                                       |                                     |                                          |
|                                         | Phase 4 Demographics, Health and Exercise Questionnaire*                                                                                                                                                                                                                                              |                                         |                                     | ✓                                        |
| <b>Emotional functioning</b>            | Difficulties in Emotion Regulation Scale (DERS) [37]                                                                                                                                                                                                                                                  |                                         |                                     | ✓                                        |
| <b>Mental health and behaviour</b>      | Psychiatric Diagnostic Screening Questionnaire (PDSQ) [34]                                                                                                                                                                                                                                            | ✓                                       |                                     |                                          |
|                                         | Global Assessment of Functioning (GAF) † [35]                                                                                                                                                                                                                                                         |                                         | ✓                                   |                                          |
|                                         | Social and Occupational Functioning Assessment Scale (SOFAS) † [35]                                                                                                                                                                                                                                   |                                         | ✓                                   |                                          |
|                                         | Beck Depression Inventory (BDI-II) [38]                                                                                                                                                                                                                                                               |                                         |                                     | ✓                                        |
|                                         | Beck Anxiety Inventory (BAI) [39]                                                                                                                                                                                                                                                                     |                                         |                                     | ✓                                        |
|                                         | Adult Self Report (ASR) [40]                                                                                                                                                                                                                                                                          |                                         |                                     | ✓                                        |
| <b>Diet</b>                             | Dietary Questionnaire for Epidemiological Studies (DQES) [41]                                                                                                                                                                                                                                         |                                         |                                     | ✓                                        |
|                                         | Phase 1 Health Questionnaire* <ul style="list-style-type: none"> <li>Specific diet information (past four weeks; e.g. gluten-free, specific carbohydrates, FODMAP, vegetarian)</li> </ul>                                                                                                             | ✓                                       |                                     |                                          |
| <b>Exercise</b>                         | Phase 4 Demographics, Health and Exercise Questionnaire*                                                                                                                                                                                                                                              |                                         |                                     | ✓                                        |
| <b>Quality of life/wellbeing</b>        | The World Health Organization quality of life assessment (WHOQOL-BREF) [42]                                                                                                                                                                                                                           |                                         |                                     | ✓                                        |
| <b>Oral health</b>                      | The World Health Organization Oral Health Questionnaire for Adults [43]                                                                                                                                                                                                                               |                                         |                                     | ✓                                        |
| <b>Physical health /medical history</b> | The Physical Health Questionnaire (PHQ) [44]                                                                                                                                                                                                                                                          |                                         |                                     | ✓                                        |
|                                         | Phase 1 Health Questionnaire* <ul style="list-style-type: none"> <li>Current bacterial, fungal, or viral infection</li> <li>Obesity, hypertension, cardiovascular disease, respiratory disease, diabetes mellitus, liver cirrhosis, fatty liver disease, coeliac disease, other autoimmune</li> </ul> | ✓                                       |                                     |                                          |

| Category                               | Questionnaire                                                                                                                                                                                                                                                                                                                                                                                                                                                                      | Phase 1<br>(Screening<br>questionnaire) | Phase 2<br>(SCID-5-RV<br>interview) | Phase 4<br>(During sample<br>collection) |
|----------------------------------------|------------------------------------------------------------------------------------------------------------------------------------------------------------------------------------------------------------------------------------------------------------------------------------------------------------------------------------------------------------------------------------------------------------------------------------------------------------------------------------|-----------------------------------------|-------------------------------------|------------------------------------------|
|                                        | disease (e.g., rheumatoid arthritis, lupus, etc.), and polycystic ovary syndrome (PCOS).<br><ul style="list-style-type: none"> <li>• Current pregnancy/lactation</li> <li>• Mode of birth</li> <li>• Medication (past month): anti-depressants/anti-anxiolytics, antibiotics, psychotropics, oral or injected steroids, probiotics, prebiotics, synbiotics, dietary supplements including laxatives, other</li> </ul> Medication (past two weeks): NSAIDs, probiotics, antifungals |                                         |                                     |                                          |
| <b>Gastrointestinal health/history</b> | Rome IV Diagnostic Questionnaire (R4DQ) [32]                                                                                                                                                                                                                                                                                                                                                                                                                                       | ✓                                       |                                     |                                          |
|                                        | Phase 1 Health Questionnaire*<br><ul style="list-style-type: none"> <li>• Non-surgical procedures related to the digestive system (past six months): enema, colonoscopy, gastroscopy</li> </ul> Inflammatory bowel disease (e.g., ulcerative colitis, Crohn's disease), short bowel syndrome, history of abdominal surgery (e.g., appendectomy, ileostomy, bowel surgery, caesarean section, etc.),                                                                                | ✓                                       |                                     |                                          |
|                                        | Phase 4 Demographics, Health and Exercise Questionnaire*<br><ul style="list-style-type: none"> <li>• Lifetime history of gastric infections: Salmonella, Shigella, Campylobacter, Giardia, Virus, Other</li> </ul>                                                                                                                                                                                                                                                                 |                                         |                                     | ✓                                        |
| <b>Stressful life events</b>           | The Lifetime Incidence of Traumatic Events (LITE) [45]                                                                                                                                                                                                                                                                                                                                                                                                                             |                                         |                                     | ✓                                        |
|                                        | Childhood Trauma Questionnaire (CTQ) [46]                                                                                                                                                                                                                                                                                                                                                                                                                                          |                                         |                                     | ✓                                        |
| <b>Substance use</b>                   | Phase 1 Health Questionnaire*<br><ul style="list-style-type: none"> <li>• Alcohol (past month)</li> <li>• Smoking (past month): tobacco cigarettes, vape, e-cigarettes containing nicotine</li> </ul> Illicit drug use (past month)                                                                                                                                                                                                                                                | ✓                                       |                                     |                                          |

1  
2  
3  
4  
5  
6  
7  
8  
9  
10  
11  
12  
13  
14  
15  
16  
17  
18  
19  
20  
21  
22  
23  
24  
25  
26  
27  
28  
29  
30  
31  
32  
33  
34  
35  
36  
37  
38  
39  
40  
41  
42  
43  
44  
45  
46  
47

| Category | Questionnaire                                                                                                   | Phase 1<br>(Screening<br>questionnaire) | Phase 2<br>(SCID-5-RV<br>interview) | Phase 4<br>(During sample<br>collection) |
|----------|-----------------------------------------------------------------------------------------------------------------|-----------------------------------------|-------------------------------------|------------------------------------------|
|          | <ul style="list-style-type: none"> <li>Dietary Questionnaire for Epidemiological Studies (DQES) [41]</li> </ul> |                                         |                                     | ✓                                        |

*Notes.* \* = designed specifically for the Bugs and Brains study; † = measure completed by researchers, rather than participants; NSAIDS= nonsteroidal anti-inflammatory drugs; SCID-5-RV = Structured Clinical Interview for the Diagnostic and Statistical Manual fifth edition, research version

For peer review only

### **Gut and oral microbiota sequencing**

Amplicon 16S ribosomal ribonucleic acid (rRNA) gene sequencing will be used to estimate participants' microbiota, using a faecal sample (gut microbiota) and a saliva sample (oral microbiota). Genomic DNA will be extracted using PowerSoil® HTP kit and amplified using universal prokaryotic 515F and 806R primers targeting the V4 region of the 16S small subunit rRNA gene [47]. Sequences are generated using paired-end sequencing on the Illumina MiSeq platform. Should additional funding be secured, shotgun metagenomic sequencing will be performed.

### **Metabolomics**

Nuclear magnetic resonance spectroscopy (NMR) will be run on faecal and urine samples to quantify metabolites. If additional funding is obtained, mass spectrometry metabolite assays will also be conducted.

### ***Sample Preparation***

**Faecal water.** A small proportion of the frozen faecal sample (0.5-1 g) will be homogenized by vortex in deuterated saline (0.9% NaCl) at 1:5 w/v before being centrifuged ( $3,200 \times g$ ) at 4 °C for 15 min. Faecal water will be syringe filtered (0.22 µm, 33 mm diameter) and dispensed into 700 µL aliquots.

**Urine.** Frozen urine samples will be thawed in ice baths, syringe filtered (0.22 µm, 33 mm diameter) and each dispensed into 700 µL aliquots.

**Metabolite extraction.** Faecal and urine samples will be prepared for NMR analysis using a liquid-liquid extraction technique [48]. A 250 µL aliquot of each faecal water/urine sample will be added to 250 µL ice-cold deuterated chloroform and 250 µL ice-cold deuterated methanol and mixed by vortex before being left on ice for 15 min. Samples are then centrifuged ( $16,000 \times g$ ) at 4 °C for 10 min to produce a biphasic mixture with a hydrophilic phase of water/deuterated methanol containing polar metabolites and lipophilic phase of deuterated chloroform containing lipophilic compounds.

### ***Nuclear magnetic resonance spectroscopy (NMR)***

A 297 µL sample of the top hydrophilic layer will be added to equal volume of 200 mM sodium phosphate in  $^2\text{H}_2\text{O}$  (pH 7.4) and 66 µL of  $^2\text{H}_2\text{O}$  containing 5 mM 3-(Trimethylsilyl)-1-propanesulfonic acid-d6 sodium salt and 0.2% (w/v) sodium azide to make a total of 660 µL. The



1  
2  
3 sample will be mixed by vortex, centrifuged at  $16,000 \times g$  for 1 min, and 550  $\mu\text{L}$  of supernatant  
4 transferred to a 7-inch 5-mm 507-grade Bruker NMR tube for NMR analysis.

5  
6 All NMR spectra of faecal water and urine will be collected using Bruker 600 MHz  
7 spectrometer set to a constant temperature of 300 K. Standard 1D  $^1\text{H}$  spectra will be acquired for  
8 faecal water using 1D NOESY pulse sequence (recycle delay- $90^\circ$ - $t_1$ - $90^\circ$ - $t_m$ -acquire) with  $t_1$   
9 corresponding to 3  $\mu\text{s}$ ,  $t_m$  to 10 ms and the  $90^\circ$  pulses optimised. Water suppression will be  
10 achieved by pre-saturation of the water signal during  $t_m$  and the recycle delay (4 s). Each  
11 spectrum will be collected over 64 K data points and 256 scans with spectral width of 20 ppm  
12 [49].  
13  
14  
15  
16  
17  
18

19 Urine spectra are acquired using the same 1D NOESY pulse sequence where recycle  
20 delay corresponded to 2 s,  $t_1$  to 3  $\mu\text{s}$  and  $t_m$  to 10 ms. Each spectrum will be collected over 32 K  
21 data points and 64 scans with spectral width of 20 ppm [50]. Using the Chenomx NMR Suite  
22 Professional software package, the free induction decay is multiplied by 0.3 Hz exponential line  
23 broadening and zero-filled before Fourier transformation. Spectra are manually phased, baseline  
24 corrected and referenced to DSS with a chemical shift of 0 ppm. The compound libraries in the  
25 Chenomx software will be used to identify and quantitate metabolites in the NMR 1D  $^1\text{H}$  spectra  
26 based on their characteristic chemical shifts using 5 mM DSS as an internal chemical shift  
27 reference.  
28  
29  
30  
31  
32  
33

### 34 **Immune and endocrine assays**

35  
36 Hormones will be measured from hair and saliva samples to estimate longer and shorter-  
37 term functioning, respectively. The hormones cortisol, DHEA, and testosterone will be assayed  
38 from the two saliva samples collected at awakening to provide indications of hypothalamic-  
39 pituitary-adrenal axis hormonal excretion. To estimate systemic inflammation, the acute phase  
40 C-reactive protein (CRP) will also be estimated from the two saliva samples, as previously  
41 described [51]. Assays for hormones and CRP will be conducted using enzyme-linked  
42 immunosorbent assay kits and performed in duplicate following manufacturer protocols.  
43  
44  
45  
46  
47

### 48 **Pre-processing of bacterial sequencing data**

49  
50 Sequencing reads will be quality filtered, trimmed, denoised and merged reads using  
51 QIIME2 [52]. The DADA2 denoising pipeline will be used for correcting sequence errors and  
52 identifying amplicon sequence variants (ASVs, i.e., sequences not containing errors) [53]. All  
53 low-quality reads will be discarded. ASVs will be taxonomically assigned using a Naïve-Bayes  
54  
55  
56  
57  
58  
59  
60

1  
2  
3 classifier against the most recent version of the Human Oral Microbiome Database (saliva) and  
4 SILVA databases (faecal samples). Sequences will be aligned using MAFFT [54], and  
5 phylogeny built using FastTree [55].  
6  
7

### 8 **Sample size calculation**

9  
10 A sample of 132 would provide 80% power at  $p = 0.01$  to detect an effect size of 0.35  
11 when comparing outcomes across the four groups (i.e., anxiety/depression, IBS, comorbidity,  
12 controls). This estimate is conservative given the effect sizes reported in related research, and our  
13 sample size of 160 exceeds this recommendation.  
14  
15

### 16 **Data analysis**

17  
18 Proposed analyses will be discipline-specific (microbial, metabolomics, immune and  
19 endocrine), but will also utilise systems biology to integrate the wide range of acquired  
20 biological, health, and psychosocial data. General linear models will first investigate the  
21 relationships between mental health, dietary patterns, exercise, GI health, oral health, early life  
22 adversity, substance use, and medical history in the questionnaire-only ancillary study. These  
23 analyses may inform necessary metadata to consider in analyses of the primary case-control  
24 component. Sources of inter-study variation hypothesised in previous investigations of the gut  
25 microbiota will be examined [25].  
26  
27  
28  
29  
30  
31

32  
33 A primary aim of the case-control component involves characterising and comparing the  
34 microbiota and metabolome in the four participant groups (i.e., anxiety/depression, IBS,  
35 comorbidity, controls). Proposed microbial analyses include group comparisons at several levels  
36 of the taxonomy (phylum, class, order, family, genus levels), which will be analysed using non-  
37 parametric tests suited to compositional data (e.g., Mann-Whitney U test). Between and within-  
38 sample diversity will also be conducted using alpha diversity (Shannon and Simpson indices,  
39 observed ASVs), and beta diversity (PCoA with PERMANOVA using weighted and unweighted  
40 UniFrac). Differential abundance, and associations between taxa abundance and metadata, will  
41 be analysed using DESeq2 and MaAsLin2 [56], correcting for multiple comparisons (Benjamini  
42 Hochberg False Discovery Rate). Statistical analyses and graphical representations will be  
43 conducted using R, with packages that enable linear multivariate methods and visualizations  
44 (e.g., vegan [57]; phyloseq [58]; ggplot2 [59]; DESeq2 [60]; MaAsLin2 [56]). It will also  
45 integrate the wide range of biological data and adopt a systems biology approach using the  
46 package mixOmics [61].  
47  
48  
49  
50  
51  
52  
53  
54  
55  
56  
57  
58  
59  
60

### **Ethics and dissemination**

Ethical approval for this project was granted by the University of Melbourne Human Research Ethics Committee (#1749221). After reading our Plain Language Statement, a comprehensive consent procedure is conducted via telephone with all participants. The voluntary nature of the study is explained, including the limits of confidentiality, secure and de-identified nature of all data, and the right to withdraw at any time without prejudice or explanation. Verbal recorded consent is obtained at the end of the first phone call should the participant wish to begin their participation. Following completion of the sample collection, participants' written consent is obtained from those who were eligible for the case-control component. Participants who complete biological samples are monetarily reimbursed for their time. Participants who complete questionnaire-only participation are reimbursed for their time with a personalized dietary analysis.

### **Patient and public involvement**

There were no funds or time allocated for patient and public involvement, therefore we were unable to involve patients in study design and recruitment. We have invited patients to assist with development of our dissemination strategy.

### **Progress to date**

Of the 775 participants who have completed the Phase 1 questionnaire since the end of 2017, 211 have met screening criteria and were invited to the SCID-5-RV interview (Phase 2). At interview, 53 participants met exclusion criteria relating to psychiatric diagnosis or related reasons. Several participants were unable to complete kit collection, moved locations, or began exclusionary medications. Accordingly, 140 of 160 participants have completed the case-control component. A total of 352 of the planned 1000 participants have completed the ancillary questionnaire-only component (Phases 1 and 4).

### **Discussion**

The high rates of co-occurrence between anxiety, depression and IBS remain poorly understood, and interactions between host physiology and the microbiota provide a promising avenue to investigate their shared underlying mechanisms. The Bugs and Brains study will be the first research project to investigate and compare the oral and gut microbiota and metabolome of participants with anxiety/depression, IBS, comorbid anxiety/depression and IBS, and controls, as assessed by clinical diagnosis and gold standard criteria. Moreover, it will analyse hypothesised

1  
2  
3 underlying mechanisms, including immune, endocrine, and microbial factors, and maintain strict  
4 inclusion and exclusion criteria. The questionnaire-only study will examine correlates of GI and  
5 mental health symptoms that have been insufficiently examined to date. Utilising comprehensive  
6 symptom-based questionnaire data and detailed physiological, microbial and psychological  
7 characterisation, study findings may facilitate the development of interventions for individuals  
8 with these highly prevalent and burdensome conditions.  
9

### 13 **Author contributions**

14  
15 JGS conceived the study, with critical input from NH, OS, SW, CAS, BC, SD, PG, NOS, CB,  
16 KH, and DE. CAS, JGS and KH wrote the manuscript. All authors critically revised and  
17 approved the final manuscript.  
18

### 20 **Funding statement**

21  
22 This research is funded by the Melbourne School of Psychological Sciences. Carra Simpson is  
23 supported by the Australian Government Research Training Program. This work was funded by  
24 the National Health and Medical Research Council (Career Development Fellowship to SW, ID  
25 1125504).  
26  
27

28  
29 **Competing interests statement:** None declared  
30

### 31 **Acknowledgments**

32  
33 Authors would like to thank all staff, students, and volunteers on the Bugs and Brains study, as  
34 well as all participants who graciously gave their time to this research. Authors report no actual  
35 or perceived conflicts of interest.  
36

37  
38 **Word Count:** 3945/4000  
39  
40  
41  
42  
43  
44  
45  
46  
47  
48  
49  
50  
51  
52  
53  
54  
55  
56  
57  
58  
59  
60

## References

- 1 Neuman H, Debelius JW, Knight R, *et al.* Microbial endocrinology: the interplay between the microbiota and the endocrine system. *FEMS Microbiol Rev* 2015;**39**:509–21. doi:10.1093/femsre/fuu010
- 2 Kamada N, Seo SU, Chen GY, *et al.* Role of the gut microbiota in immunity and inflammatory disease. *Nat Rev Immunol* 2013;**13**:321–35. doi:10.1038/nri3430
- 3 Sikander A, Rana SV, Prasad KK. Role of serotonin in gastrointestinal motility and irritable bowel syndrome. *Clin Chim Acta* 2009;**403**:47–55. doi:10.1016/j.cca.2009.01.028
- 4 Martinez FD. The human microbiome. Early life determinant of health outcomes. *Ann Am Thorac Soc* 2014;**11 Suppl 1**:S7-12. doi:10.1513/AnnalsATS.201306-186MG
- 5 Lovell RM, Ford AC. Global Prevalence of and Risk Factors for Irritable Bowel Syndrome: A Meta-analysis. *Clin Gastroenterol Hepatol* 2012;**10**:712–21. doi:10.1016/j.cgh.2012.02.029
- 6 World Health Organization. Depression and Other Common Mental Health Disorders: Global Health Estimates. 2017. <http://apps.who.int/iris/bitstream/handle/10665/254610/WHO-MSD-MER-2017.2-eng.pdf;jsessionid=D7B089CDA4A6FD66BD711AE0E39C4511?sequence=1> (accessed 17 Jul 2019).
- 7 Pinto-Sanchez MI, Ford AC, Avila CA, *et al.* Anxiety and depression increase in a stepwise manner in parallel with multiple FGIDs and symptom severity and frequency. *Am J Gastroenterol* 2015;**110**:1038–48. doi:10.1038/ajg.2015.128
- 8 Banerjee A, Sarkhel S, Sarkar R, *et al.* Anxiety and Depression in Irritable Bowel Syndrome. *Indian J Psychol Med* 2017;**39**:741–5. doi:10.4103/IJPSYM.IJPSYM\_46\_17
- 9 Fond G, Loundou A, Hamdani N, *et al.* Anxiety and depression comorbidities in irritable bowel syndrome (IBS): a systematic review and meta-analysis. *Eur Arch Psychiatry Clin Neurosci* Published Online First: 2014. doi:10.1007/s00406-014-0502-z
- 10 Kurokawa S, Kishimoto T, Mizuno S, *et al.* The effect of fecal microbiota transplantation

- on psychiatric symptoms among patients with irritable bowel syndrome, functional diarrhea and functional constipation: An open-label observational study. *J Affect Disord* 2018;**235**:506–12. doi:10.1016/j.jad.2018.04.038
- 11 Sibelli A, Chalder T, Everitt H, *et al.* A systematic review with meta-analysis of the role of anxiety and depression in irritable bowel syndrome onset. *Psychol Med* 2016;**46**:3065–80. doi:10.1017/S0033291716001987
- 12 Jiang H, Zhang X, Yu Z, *et al.* Altered gut microbiota profile in patients with generalized anxiety disorder. *J Psychiatr Res* 2018;**104**:130–6. doi:10.1016/j.jpsychires.2018.07.007
- 13 Winter G, Hart RA, Charlesworth RPG, *et al.* Gut microbiome and depression: What we know and what we need to know. *Rev Neurosci* 2018;**29**:629–43. doi:10.1515/revneuro-2017-0072
- 14 Simpson CA, Mu A, Haslam N, *et al.* Feeling down? A systematic review of the gut microbiota in anxiety/depression and irritable bowel syndrome. *J Affect Disord* 2020;**266**:429–46. doi:10.1016/j.jad.2020.01.124
- 15 Pittayanon R, Lau JT, Yuan Y, *et al.* Gut microbiota in patients with irritable bowel syndrome-a systematic review. *Gastroenterology* 2019;**157**:97–108.
- 16 Aizawa E, Tsuji H, Asahara T, *et al.* Possible association of Bifidobacterium and Lactobacillus in the gut microbiota of patients with major depressive disorder. *J Affect Disord* 2016;**202**:254–7. doi:10.1016/j.jad.2016.05.038
- 17 Liu Y, Zhang L, Wang X, *et al.* Similar Fecal Microbiota Signatures in Patients With Diarrhea-Predominant Irritable Bowel Syndrome and Patients With Depression. *Clin Gastroenterol Hepatol* 2016;**14**:1602-1611.e5. doi:10.1016/j.cgh.2016.05.033
- 18 Tap J, Derrien M, Törnblom H, *et al.* Identification of an Intestinal Microbiota Signature Associated With Severity of Irritable Bowel Syndrome. *Gastroenterology* 2017;**152**:111-123.e8. doi:10.1053/j.gastro.2016.09.049
- 19 Labus JS, Hollister EB, Jacobs J, *et al.* Differences in gut microbial composition correlate with regional brain volumes in irritable bowel syndrome. *Microbiome* 2017;**5**:1–17. doi:10.1186/S40168-017-0260-Z

- 1  
2  
3 20 Sundin J, Rangel I, Fuentes S, *et al.* Altered faecal and mucosal microbial composition in  
4 post-infectious irritable bowel syndrome patients correlates with mucosal lymphocyte  
5 phenotypes and psychological distress. *Aliment Pharmacol Ther* 2015;**41**:342–51.  
6 doi:10.1111/apt.13055  
7  
8  
9  
10  
11 21 Yusof N, Hamid N, Ma ZF, *et al.* Exposure to environmental microbiota explains  
12 persistent abdominal pain and irritable bowel syndrome after a major flood. *Gut Pathog*  
13 2017;**9**:3–12. doi:10.1186/s13099-017-0224-7  
14  
15  
16  
17 22 Deo PN, Deshmukh R. Oral microbiome: Unveiling the fundamentals. *J Oral Maxillofac*  
18 *Pathol* 2019;**23**:122–8. doi:10.4103/jomfp.JOMFP\_304\_18  
19  
20  
21 23 Turnbaugh PJ, Ley RE, Hamady M, *et al.* The human microbiome project. *Nature*  
22 2007;**449**.  
23  
24  
25 24 Olsen I, Yamazaki K. Can oral bacteria affect the microbiome of the gut? *J Oral*  
26 *Microbiol* 2019;**11**:1586422. doi:10.1080/20002297.2019.1586422  
27  
28  
29 25 Simpson CA, Schwartz OS, Simmons JG. The human gut microbiota and depression:  
30 widely reviewed, yet poorly understood. *J. Affect. Disord.* 2020;**274**:73–5.  
31 doi:10.1016/j.jad.2020.05.115  
32  
33  
34  
35 26 Valles-Colomer M, Falony G, Darzi Y, *et al.* The neuroactive potential of the human gut  
36 microbiota in quality of life and depression. *Nat Microbiol* 2019;**4**:623–32.  
37 doi:10.1038/s41564-018-0337-x  
38  
39  
40  
41 27 Dash S, Clarke G, Berk M, *et al.* The gut microbiome and diet in psychiatry: focus on  
42 depression. *Curr Opin Psychiatry* 2015;**28**:1–6. doi:10.1097/YCO.000000000000117  
43  
44  
45 28 Kolodziejczyk AA, Zheng D, Elinav E. Diet–microbiota interactions and personalized  
46 nutrition. *Nat Rev Microbiol* 2019;**17**:742–53. doi:10.1038/s41579-019-0256-8  
47  
48  
49 29 Canavan C, West J, Card T. The epidemiology of irritable bowel syndrome. *Clin*  
50 *Epidemiol* 2014;**6**:71–80. doi:10.2147/CLEP.S40245  
51  
52  
53 30 Ma Z (Sam), Li W. How and Why Men and Women Differ in Their Microbiomes:  
54 Medical Ecology and Network Analyses of the Microgenderome. *Adv Sci*  
55  
56  
57  
58  
59  
60



- 2019;**6**:1902054. doi:10.1002/advs.201902054
- 31 First M, Williams J, Karg R, *et al*. *Structured Clinical interview for DSM-5, Research Version (SCID-5 for DSM-5, Research Version; SCID-5-RV)*. Arlington, VA: : American Psychiatric Association 2015.
- 32 Drossman DA, Hasler WL. Introduction: Rome IV—Functional GI Disorders: Disorders of Gut-Brain Interaction. *Gastroenterology* 2016;**150**:1257–61. <http://10.0.4.29/j.gastro.2016.03.035>
- 33 Drossman DA. Functional gastrointestinal disorders: History, pathophysiology, clinical features, and Rome IV. *Gastroenterology* 2016;**150**:1262-1279e2. doi:10.1053/j.gastro.2016.02.032
- 34 Zimmerman M, Mattia JI. A Self-Report Scale to Help Make Psychiatric Diagnoses: The Psychiatric Diagnostic Screening Questionnaire. *Arch Gen Psychiatry* 2001;**58**:787–94. doi:10.1001/archpsyc.58.8.787
- 35 American Psychiatric Association. *American Psychiatric Association: Diagnostic and Statistical Manual of Mental Disorders, Fourth Edition, Text Revision (DSM-IV-TR)*. Washington, DC: : American Psychiatric Association 2000.
- 36 Gerdtz MF, Daniel C, Dearie V. The Management of Clinical Aggression-Rapid Emergency Department Intervention &#x201c;MOCA-REDI&#x201d;: An outcome evaluation. *Australas Emerg Nurs J* 2011;**14**:S12. doi:10.1016/j.aenj.2011.09.033
- 37 Gratz KL, Roemer L. Multidimensional Assessment of Emotion Regulation and Dysregulation: Development, Factor Structure, and Initial Validation of the Difficulties in Emotion Regulation Scale. *J Psychopathol Behav Assess* 2004;**26**:41–54. doi:10.1023/B:JOBA.0000007455.08539.94
- 38 Beck A., Steer R., Brown G. *Manual for the Beck Depression Inventory-II*. San Antonio, TX: : Psychological Corporation 1996.
- 39 Beck A., Streer R. *Beck Anxiety Inventory Manual*. San Antonio, TX: : Psychological Corporation 1993.



- 1  
2  
3 40 Achenbach T, Rescorla L. *Manual for the ASEBA adult forms & profiles*. Burlington: :  
4 University of Vermont, Research Center for Children, Youth, and Families 2003.  
5  
6  
7 41 Giles G, Ireland P. *Dietary Questionnaire for Epidemiological Studies (Version 3.2)*.  
8 Melbourne: : Cancer Council Victoria 1996.  
9  
10  
11 42 The WHOQOL Group. The World Health Organization quality of life assessment  
12 (WHOQOL): Development and general psychometric properties. *Soc Sci Med*  
13 1998;**46**:1569–85. doi:[https://doi.org/10.1016/S0277-9536\(98\)00009-4](https://doi.org/10.1016/S0277-9536(98)00009-4)  
14  
15  
16  
17 43 World Health Organization. *Oral health surveys: Basic Methods*. 5th ed. World Health  
18 Organization 1987.  
19  
20  
21 44 Schat ACH, Kelloway EK, Desmarais S. The Physical Health Questionnaire (PHQ):  
22 construct validation of a self-report scale of somatic symptoms. *J Occup Health Psychol*  
23 2005;**10**:363–81. doi:10.1037/1076-8998.10.4.363  
24  
25  
26  
27 45 Greenwald R, Rubin A. Assessment of posttraumatic symptoms in children: Development  
28 and preliminary validation of parent and child scales. *Res. Soc. Work Pract.* 1999;**9**:61–  
29 75. doi:10.1177/104973159900900105  
30  
31  
32  
33 46 Berstein D., Fink L. *Childhood Trauma Questionnaire: A retrospective self-report*  
34 *manual*. San Antonio, TX: : Psychological Corporation 1998.  
35  
36  
37 47 Caporaso JG, Lauber CL, Walters WA, *et al*. Global patterns of 16S rRNA diversity at a  
38 depth of millions of sequences per sample. *Proc Natl Acad Sci* 2011;**108**:4516 LP – 4522.  
39 doi:10.1073/pnas.1000080107  
40  
41  
42  
43 48 Sheedy JR, Ebeling PR, Gooley PR, *et al*. A sample preparation protocol for 1H nuclear  
44 magnetic resonance studies of water-soluble metabolites in blood and urine. *Anal Biochem*  
45 2010;**398**:263.doi.10.1016/j.ab.2009.11.027  
46  
47  
48  
49 49 Gratton J, Phetcharaburanin J, Mullish BH, *et al*. Optimized Sample Handling Strategy for  
50 Metabolic Profiling of Human Feces. *Anal Chem*  
51 2016;**88**:4661.doi.org/10.1021/acs.analchem.5b04159  
52  
53  
54  
55 50 Beckonert O, Keun HC, Ebbels TM, *et al*. Metabolic profiling, metabolomic and  
56  
57  
58  
59

- metabonomic procedures for NMR spectroscopy of urine, plasma, serum and tissue extracts. *Nat Protoc* 2007;**2**:2692. <https://doi.org/10.1038/nprot.2007.376>
- 51 Byrne ML, Horne S, O'Brien-Simpson NM, *et al.* Associations between observed parenting behavior and adolescent inflammation two and a half years later in a community sample. *Heal. Psychol.* 2017;**36**:641–51. doi:10.1037/hea0000502
- 52 Bolyen E, Rideout JR, Dillon MR, *et al.* Reproducible, interactive, scalable and extensible microbiome data science using QIIME 2. *Nat Biotechnol* 2019;**37**:852–7. doi:10.1038/s41587-019-0209-9
- 53 Callahan BJ, McMurdie PJ, Rosen MJ, *et al.* DADA2: High-resolution sample inference from Illumina amplicon data. *Nat Methods* 2016;**13**:581–3. doi:10.1038/nmeth.3869
- 54 Katoh K, Misawa K, Kuma K, *et al.* MAFFT: a novel method for rapid multiple sequence alignment based on fast Fourier transform. *Nucleic Acids Res* 2002;**30**. doi:10.1093/nar/gkf436
- 55 Price MN, Dehal PS, Arkin AP. FastTree 2—approximately maximum-likelihood trees for large alignments. *PLoS One* 2010;**5**. doi:10.1371/journal.pone.0009490
- 56 Mallick H, McIver LJ, Rahnavard A, *et al.* Multivariable Association in Population-scale Meta-omics Studies. 2020. <http://huttenhower.sph.harvard.edu/maaslin2>
- 57 Oksanen J, Blanchet FG, Kindt R, *et al.* *Vegan: community ecology package*. 2012. <https://cran.r-project.org/web/packages/vegan/index.html>
- 58 McMurdie PJ, Holmes S. Phyloseq: An R Package for Reproducible Interactive Analysis and Graphics of Microbiome Census Data. *PLoS One* 2013;**8**. doi:10.1371/journal.pone.0061217
- 59 Wickham H. *ggplot2: Elegant Graphics for Data Analysis*. New York: : Springer-Verlag 2016. <https://ggplot2.tidyverse.org>
- 60 Love MI, Huber W, Anders S. Moderated estimation of fold change and dispersion for RNA-seq data with DESeq2. *Genome Biol* 2014;**15**:550. doi:10.1186/s13059-014-0550-8
- 61 Rohart F, Gautier B, Singh A, *et al.* mixOmics: an R package for ‘omics feature selection

1  
2  
3  
4  
5  
6  
7  
8  
9  
10  
11  
12  
13  
14  
15  
16  
17  
18  
19  
20  
21  
22  
23  
24  
25  
26  
27  
28  
29  
30  
31  
32  
33  
34  
35  
36  
37  
38  
39  
40  
41  
42  
43  
44  
45  
46  
47  
48  
49  
50  
51  
52  
53  
54  
55  
56  
57  
58  
59  
60

and multiple data integration. *bioRxiv* 2017;:108597. doi:10.1101/108597

For peer review only

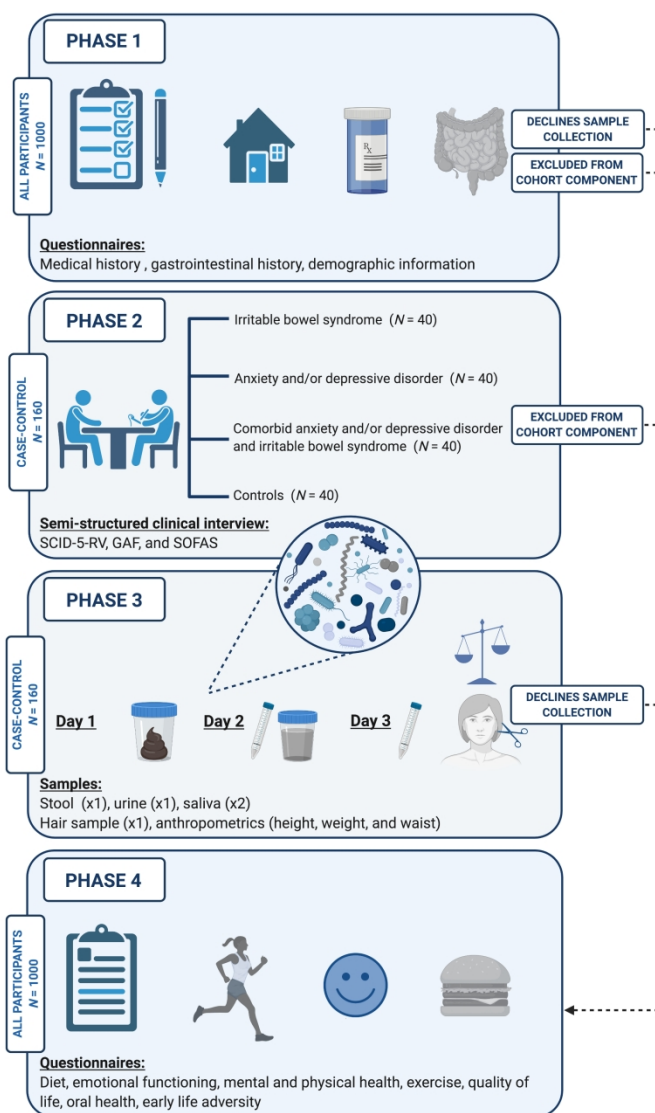

Figure 1. Phases of participation in the Bugs and Brains study. Participants eligible for the primary case-control component at Phases 1 and 2 complete all phases of the study within a month, including biological sample collection (N = 160; n = 40 with IBS, n = 40 with anxiety and/or depressive disorder, n = 40 with IBS and anxiety and/or depressive disorder, n = 40 with no lifetime history of either IBS or an anxiety/depressive disorder). Participants who decline sample collection or are not eligible for the primary component complete the questionnaire-only ancillary component (Phases 1 and 4; N = 1000). GAF = Global Assessment of Functioning; IBS = irritable bowel syndrome; SOFAS = Social and Occupational Functioning Assessment Scale; Structured Clinical Interview for the Diagnostic and Statistical Manual (DSM) 5th edition (Research version [SCID-5-RV]). Created with BioRender.com.

# BMJ Open

**Protocol: Bugs and Brains, the Gut and Mental Health Study  
- A mixed-methods study investigating microbiota  
composition and function in anxiety, depression and  
irritable bowel syndrome**

|                               |                                                                                                                                                                                                                                                                                                                                                                                                                                                                                                                                                                                                                                                                                                                                                                                                                                                                                                                                                                                                                                                                                                                                                                                                                                                                                                                                                                                                                                                                                                                                                                                                                                                                                                                                                                                                                                                                                                                                                                                                                                                                                                                                                                                                                                                                                                                           |
|-------------------------------|---------------------------------------------------------------------------------------------------------------------------------------------------------------------------------------------------------------------------------------------------------------------------------------------------------------------------------------------------------------------------------------------------------------------------------------------------------------------------------------------------------------------------------------------------------------------------------------------------------------------------------------------------------------------------------------------------------------------------------------------------------------------------------------------------------------------------------------------------------------------------------------------------------------------------------------------------------------------------------------------------------------------------------------------------------------------------------------------------------------------------------------------------------------------------------------------------------------------------------------------------------------------------------------------------------------------------------------------------------------------------------------------------------------------------------------------------------------------------------------------------------------------------------------------------------------------------------------------------------------------------------------------------------------------------------------------------------------------------------------------------------------------------------------------------------------------------------------------------------------------------------------------------------------------------------------------------------------------------------------------------------------------------------------------------------------------------------------------------------------------------------------------------------------------------------------------------------------------------------------------------------------------------------------------------------------------------|
| Journal:                      | <i>BMJ Open</i>                                                                                                                                                                                                                                                                                                                                                                                                                                                                                                                                                                                                                                                                                                                                                                                                                                                                                                                                                                                                                                                                                                                                                                                                                                                                                                                                                                                                                                                                                                                                                                                                                                                                                                                                                                                                                                                                                                                                                                                                                                                                                                                                                                                                                                                                                                           |
| Manuscript ID                 | bmjopen-2020-043221.R1                                                                                                                                                                                                                                                                                                                                                                                                                                                                                                                                                                                                                                                                                                                                                                                                                                                                                                                                                                                                                                                                                                                                                                                                                                                                                                                                                                                                                                                                                                                                                                                                                                                                                                                                                                                                                                                                                                                                                                                                                                                                                                                                                                                                                                                                                                    |
| Article Type:                 | Protocol                                                                                                                                                                                                                                                                                                                                                                                                                                                                                                                                                                                                                                                                                                                                                                                                                                                                                                                                                                                                                                                                                                                                                                                                                                                                                                                                                                                                                                                                                                                                                                                                                                                                                                                                                                                                                                                                                                                                                                                                                                                                                                                                                                                                                                                                                                                  |
| Date Submitted by the Author: | 03-Feb-2021                                                                                                                                                                                                                                                                                                                                                                                                                                                                                                                                                                                                                                                                                                                                                                                                                                                                                                                                                                                                                                                                                                                                                                                                                                                                                                                                                                                                                                                                                                                                                                                                                                                                                                                                                                                                                                                                                                                                                                                                                                                                                                                                                                                                                                                                                                               |
| Complete List of Authors:     | <p>Simpson, Carra; The University of Melbourne Faculty of Medicine Dentistry and Health Sciences, Melbourne School of Psychological Sciences</p> <p>Schwartz, Orli; Orygen The National Centre of Excellence in Youth Mental Health, Centre for Youth Mental Health</p> <p>Eliby, Djamila; The University of Melbourne Faculty of Medicine Dentistry and Health Sciences, Melbourne School of Psychological Sciences; The University of Melbourne Faculty of Medicine Dentistry and Health Sciences, Melbourne Neuropsychiatry Centre</p> <p>Butler, Catherine; The University of Melbourne Faculty of Medicine Dentistry and Health Sciences, Centre for Oral Health Research, Melbourne Dental School, Bio21 Institute</p> <p>Huang, Katherine; The University of Melbourne Bio21 Molecular Science and Biotechnology Institute, Department of Biochemistry and Molecular Biology</p> <p>Simpson-O'Brien, Neil; The University of Melbourne Faculty of Medicine Dentistry and Health Sciences, Centre for Oral Health Research, Melbourne Dental School, Bio21 Institute</p> <p>Callaghan, Bridget; University of California Los Angeles, The Department of Psychology; The University of Melbourne Faculty of Medicine Dentistry and Health Sciences, Melbourne Neuropsychiatry Centre</p> <p>Dashper, Stuart; The University of Melbourne Faculty of Medicine Dentistry and Health Sciences, Centre for Oral Health Research, Melbourne Dental School, Bio21 Institute</p> <p>Gooley, Paul; The University of Melbourne Bio21 Molecular Science and Biotechnology Institute, Department of Biochemistry and Molecular Biology</p> <p>Whittle, Sarah; The University of Melbourne Faculty of Medicine Dentistry and Health Sciences, Melbourne Neuropsychiatry Centre; The University of Melbourne Faculty of Medicine Dentistry and Health Sciences, Melbourne School of Psychological Sciences</p> <p>Haslam, Nick; The University of Melbourne Faculty of Medicine Dentistry and Health Sciences, Melbourne School of Psychological Sciences</p> <p>Simmons, Julian; The University of Melbourne Faculty of Medicine Dentistry and Health Sciences, Melbourne School of Psychological Sciences; The University of Melbourne Faculty of Medicine Dentistry and Health Sciences, Melbourne Neuropsychiatry Centre</p> |

1  
2  
3  
4  
5  
6  
7  
8  
9  
10  
11  
12  
13  
14  
15  
16  
17  
18  
19  
20  
21  
22  
23  
24  
25  
26  
27  
28  
29  
30  
31  
32  
33  
34  
35  
36  
37  
38  
39  
40  
41  
42  
43  
44  
45  
46  
47  
48  
49  
50  
51  
52  
53  
54  
55  
56  
57  
58  
59  
60

|                                                    |                                                                                                                                                   |
|----------------------------------------------------|---------------------------------------------------------------------------------------------------------------------------------------------------|
| <b>&lt;b&gt;Primary Subject Heading&lt;/b&gt;:</b> | Mental health                                                                                                                                     |
| Secondary Subject Heading:                         | Dentistry and oral medicine, Gastroenterology and hepatology, Genetics and genomics, Immunology (including allergy), Nutrition and metabolism     |
| Keywords:                                          | MICROBIOLOGY, Anxiety disorders < PSYCHIATRY, Depression & mood disorders < PSYCHIATRY, Functional bowel disorders < GASTROENTEROLOGY, PSYCHIATRY |
|                                                    |                                                                                                                                                   |

SCHOLARONE™  
Manuscripts

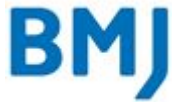

I, the Submitting Author has the right to grant and does grant on behalf of all authors of the Work (as defined in the below author licence), an exclusive licence and/or a non-exclusive licence for contributions from authors who are: i) UK Crown employees; ii) where BMJ has agreed a CC-BY licence shall apply, and/or iii) in accordance with the terms applicable for US Federal Government officers or employees acting as part of their official duties; on a worldwide, perpetual, irrevocable, royalty-free basis to BMJ Publishing Group Ltd ("BMJ") its licensees and where the relevant Journal is co-owned by BMJ to the co-owners of the Journal, to publish the Work in this journal and any other BMJ products and to exploit all rights, as set out in our [licence](#).

The Submitting Author accepts and understands that any supply made under these terms is made by BMJ to the Submitting Author unless you are acting as an employee on behalf of your employer or a postgraduate student of an affiliated institution which is paying any applicable article publishing charge ("APC") for Open Access articles. Where the Submitting Author wishes to make the Work available on an Open Access basis (and intends to pay the relevant APC), the terms of reuse of such Open Access shall be governed by a Creative Commons licence – details of these licences and which [Creative Commons](#) licence will apply to this Work are set out in our licence referred to above.

Other than as permitted in any relevant BMJ Author's Self Archiving Policies, I confirm this Work has not been accepted for publication elsewhere, is not being considered for publication elsewhere and does not duplicate material already published. I confirm all authors consent to publication of this Work and authorise the granting of this licence.

1  
2  
3 **Protocol: Bugs and Brains, the Gut and Mental Health Study - A mixed-methods study**  
4 **investigating microbiota composition and function in anxiety, depression and irritable**  
5 **bowel syndrome**  
6  
7  
8  
9

10 Carra A. Simpson<sup>1,2</sup>, Orli S. Schwartz<sup>3</sup>, Djamila Eliby<sup>1,2</sup>, Catherine A. Butler<sup>4</sup>, Katherine  
11 Huang<sup>5</sup>, Neil O'Brien-Simpson<sup>4</sup>, Bridget L. Callaghan<sup>2,6</sup>, Stuart G. Dashper<sup>4</sup>, Paul R. Gooley<sup>5</sup>,  
12 Sarah Whittle<sup>1,2</sup>, Nick Haslam<sup>1</sup>, & Julian G. Simmons<sup>1,2</sup>  
13  
14  
15

16  
17  
18 <sup>1</sup> Melbourne School of Psychological Sciences, Faculty of Medicine, Dentistry and Health  
19 Sciences, The University of Melbourne, VIC, 3010, Australia.  
20

21  
22 <sup>2</sup> Melbourne Neuropsychiatry Centre, Department of Medicine, Faculty of Medicine, Dentistry  
23 and Health Sciences, The University of Melbourne and Melbourne Health, VIC, 3010, Australia.  
24

25  
26 <sup>3</sup> Orygen, The National Centre of Excellence in Youth Mental Health; Centre for Youth Mental  
27 Health, The University of Melbourne, VIC, 3010, Australia.  
28

29  
30 <sup>4</sup> Centre for Oral Health Research, Melbourne Dental School, Bio21 Institute, The University of  
31 Melbourne, VIC, 3010, Australia  
32  
33

34  
35 <sup>5</sup> Department of Biochemistry and Molecular Biology, Bio21 Molecular Science and  
36 Biotechnology Institute, University of Melbourne, VIC, 3010, Australia  
37  
38

39  
40 <sup>6</sup> The Department of Psychology, The University of California, Los Angeles, 90503  
41

42  
43 **Correspondence:** Carra A. Simpson, <https://orcid.org/0000-0002-8281-5881>  
44

45 Melbourne School of Psychological Sciences, 12th floor Redmond Barry Building, The  
46 University of Melbourne, Parkville, VIC 3010, Australia.  
47

48  
49 Email: [carra.simpson@unimelb.edu.au](mailto:carra.simpson@unimelb.edu.au), Phone: +61 03 8344 1845  
50

51  
52 **Declarations of interest:** None  
53  
54  
55  
56  
57  
58  
59  
60



## Abstract

**Introduction:** Research has highlighted relationships between the microorganisms that inhabit our gastrointestinal tract (oral and gut microbiota) with host mood and gastrointestinal functioning. Mental health disorders and functional gastrointestinal disorders co-occur at high rates, although the mechanisms underlying these associations remain unclear. The Bugs and Brains study aims to investigate complex relationships between anxiety/depression and irritable bowel syndrome (IBS) in two ways. Firstly, its primary component will compare the gut and oral microbiota in females with anxiety/depression and/or IBS relative to controls, and investigate underlying physiological, endocrine, and immune factors, as well as associations with diet and psychosocial factors. In an ancillary component, the study will also investigate gastrointestinal and mental health symptoms in a larger sample, and explore relationships with diet, exercise, oral health, substance use, medical history, early life adversity and psychosocial factors.

**Methods and analysis:** The Bugs and Brains study aims to recruit 160 females to the primary component: i) 40 controls; ii) 40 participants with a depressive/anxiety disorder, but no IBS; iii) 40 participants with IBS, but no depressive/anxiety disorder; and iv) 40 participants with both depressive/anxiety disorder and IBS. Participation is completed within one month, and involves comprehensive questionnaires, anthropometrics, a diagnostic clinical interview, collection of two saliva samples, and stool, urine, and hair samples. This study aims to use a systems biology approach to characterise oral and gut microbial composition and function using 16S rRNA gene sequencing and nuclear magnetic resonance spectroscopy. As part of the ancillary component, it will collect questionnaire data from 1000 females aged 18-40 years, capturing mental health, gastrointestinal health, oral health, diet, and psychosocial factors. **Ethics and dissemination:** Approval was granted by the University of Melbourne Human Research Ethics Committee (#1749221). All participants voluntarily provided informed consent. Results will be published in peer-reviewed journals and presented at scientific conferences.

**Keywords:** Gut microbiota, microbiome, depression, anxiety, irritable bowel syndrome

## Article summary

### *Strengths and limitations*

- The Bugs and Brains Study will compare oral and gut microbiota composition and function using next generation sequencing and nuclear magnetic resonance spectroscopy in individuals with anxiety/depression, IBS, both anxiety/depression and IBS, and controls, as defined by clinical diagnosis and strict inclusion criteria.
- It will assess diet, medical history, gastrointestinal health, early life adversity, mental and physical health symptoms using detailed questionnaires and clinical interview, and investigate associations between symptoms, microbiota, metabolome, and the immune and endocrine systems.
- It will also investigate gastrointestinal and mental health symptoms in a large sample, and examine relationships with diet, exercise, oral health, substance use, medical history, early life adversity and psychosocial factors.
- This study chose to recruit females aged 18 to 40 to control for the confounding effects of biological sex and age, therefore its generalisability is limited to this specific population.
- This study is cross-sectional in nature and employs 16S rRNA gene sequencing; future research should investigate these associations using deeper resolution sequencing (i.e., shotgun metagenomics), examine relationships longitudinally to disentangle causes and effects, and extend investigations to male participants.

## Introduction

Microorganisms have co-existed alongside humans throughout our evolution, with between 20 and 30 trillion microbial cells occupying ecological niches within and upon the human body. It is therefore unsurprising that bacteria residing throughout the gastrointestinal (GI) tract are implicated in host endocrine, immune, and nervous system functioning [1]. Microbes produce neuroactive compounds, including catecholamines (e.g., noradrenaline, dopamine), GABA, histamine, serotonin, and acetylcholine, each of which plays a critical role in human physiological functioning [1,2]. Multiple GI bacteria and their metabolic products also facilitate peristaltic waves to aid with digestion [3], contribute to fermentation of dietary carbohydrates, maintain host membrane function, and produce essential amino acids and vitamins [2,4]. Resident bacterial species also prime the immune system in the early stages of life, teaching our bodies what is 'foreign' rather than commensal [2]. The gut microbiota (i.e., the collection of microorganisms in the GI tract) is therefore essential to normal development.

As we come to appreciate the essential role microorganisms play in host physiology, so too have we opened a novel direction for investigation in conditions with no current clear aetiology. Among these are irritable bowel syndrome (IBS), depression and anxiety disorders. IBS is the most common functional gastrointestinal disorder (FGID), affecting between 7 to 21% of individuals worldwide [5]. Similarly, depression remains the highest contributor to non-fatal health burden, and approximately 264 million individuals live with an anxiety disorder globally [6]. These three conditions frequently co-occur [7]: approximately 84% of patients with IBS also have a depressive disorder and 44% an anxiety disorder [8,9]. Moreover, 45% of participants with anxiety and 30% of participants with a depressive disorder develop IBS [7,10,11]. The mechanisms underlying this comorbidity remain unclear.

The complex interplay between host physiology and microbiota promises novel insight into these conditions. Research has revealed that anxiety, depression and IBS share several gut microbial alterations, including decreased overall microbial diversity and a higher relative abundance of pro-inflammatory and toxigenic species [12–15]. Moreover, research indicates alterations may exist along a continuum, in that participants with comorbid depression and IBS have gut microbiota alterations simply more pronounced than those presenting with one disorder, including higher Proteobacteria, *Prevotella/Prevotellaceae*, *Bacteroides* and lower *Lachnospiraceae* [10,16–18]. These implicated taxa further build on the evidence of altered

1  
2  
3 microbial and host immune system interactions, as the taxa reported to have a higher relative  
4 abundance in anxiety, depression and IBS are associated with inflammation, whereas a loss of  
5 species that secrete anti-inflammatory metabolic products has also been observed [14]. No  
6 studies have compared the gut microbiota of participants with anxiety relative to IBS, although  
7 studies have identified correlations between bacterial taxa and anxiety symptoms among IBS  
8 patients [18–20].

9  
10  
11  
12  
13  
14 Although research in this area has primarily investigated the composition of the gut  
15 microbiota, the entire length of the GI tract harbours resident microorganisms. At its entryway,  
16 the microbiota of the oral cavity is the second most diverse community in the human body [21],  
17 and research indicates that microbial representation in the mouth is predictive of composition in  
18 the lower GI tract [22]. Oral bacteria can also translocate throughout the body, with significant  
19 effects on GI and systemic health [23]. No known studies have examined the oral microbiota in  
20 clinical anxiety, depression or IBS; however, our existing research observed associations  
21 between oral microbiota composition with anxiety and depression symptoms [24].

22  
23  
24  
25  
26  
27  
28  
29  
30  
31  
32  
33  
34  
35  
36  
37  
38  
39  
40  
41  
42  
43  
44  
45  
46  
47  
48  
49  
50  
51  
52  
53  
54  
55  
56  
57  
58  
59  
60  
Characterisation of the oral microbiota in clinical mental health and IBS cohorts therefore  
warrants investigation.

Several confounding factors have been neglected in the small literature investigating the  
microbiota in IBS, anxiety, and depression. Due to their effects on microbial composition, future  
research should consider psychotropic medication use [25, 26], smoking [27], alcohol  
consumption [27], IBS subtype and severity [15,18], as well as biological sex [28]. Diet, and its  
interaction with psychosocial factors, is another source of gut microbiota variation that has been  
insufficiently considered in existing research [29,30]. Finally, the extant literature has not often  
utilised gold-standard diagnostic measures to examine mental health (i.e., clinical interviews),  
and studies have examined microbiota composition but neglected microbial function [31].

### **Aims and objectives**

Bugs and Brains, the Gut and Mental Health Study (The Bugs and Brains Study) aims to  
characterise the microbial and physiological profiles in anxiety, depression, and IBS; to examine  
associations between symptoms and confounding variables; and, to investigate varied  
contributors to disorder presentation (both across and within disorders). In this primary case-  
control component, key questions relate to the similarities and differences across bacterial,  
metabolic, endocrine, and immune indices, in a well-controlled cohort. Given the associations

1  
2  
3 between biological sex and the microbiota, this study chose to recruit females only and exclude  
4 current smokers or participants with a substance abuse disorder. Possible sources of inter-study  
5 variation in previous investigations will be considered (i.e., symptom severity, medication use,  
6 diet). In a large ancillary questionnaire-only component, this research will also investigate how  
7 GI and mental health symptoms are associated with diet, exercise, oral health, substance use,  
8 medical history, early life adversity, and psychosocial factors. Understanding shared and distinct  
9 microbiota relationships in IBS, anxiety and depression, particularly within a well-characterised  
10 sample, has implications in resolving the directionality of co-morbidity, and in informing future  
11 targeted clinical interventions.  
12  
13  
14  
15  
16  
17  
18

## 19 **Methods and analysis**

### 20 **Participants**

#### 21 ***Primary case-control component***

22 Females aged 18 to 40 will be assessed for participation in all phases of the Bugs and  
23 Brains Study. Recruitment for the study began in October 2017 and all phases are expected to be  
24 completed by December 2021. The primary case-control component will include 160  
25 community-based female volunteers aged 18 to 40 who meet eligibility criteria for one of four  
26 groups:  
27  
28  
29  
30  
31

- 32 i) 40 controls
  - 33 ii) 40 participants with a depressive/anxiety disorder, but no IBS
  - 34 iii) 40 participants with IBS, but no depressive/anxiety disorder; and
  - 35 iv) 40 participants with depressive/anxiety disorder and IBS
- 36  
37  
38  
39  
40

41 The study chose to recruit only participants of the female sex due to significantly elevated rates  
42 of all three conditions relative to biological males [6,32]. All participants are being recruited  
43 through online and printed advertisements at the University of Melbourne and using paid  
44 Facebook ads. All participants provide informed consent and demonstrate adequate  
45 comprehension of English. Participants who complete biological samples are monetarily  
46 reimbursed for their time, and participants who complete the ancillary questionnaire-only  
47 component are reimbursed with a personalised dietary analysis.  
48  
49  
50  
51  
52

#### 53 ***Ancillary questionnaire-only component***

54 To investigate associations in a larger sample, the ancillary component aims to collect  
55  
56  
57  
58  
59  
60

questionnaire data from 1000 females aged 18 to 40, capturing mental health, diet, exercise, gastrointestinal health, oral health, substance use, medical history, emotion regulation, stress, early life adversity, and medical history.

### **Inclusion criteria for the case-control component**

Participants in the primary component are required to live in Greater Melbourne or Geelong (unless willing to travel to the site of sample collection: Melbourne, Australia). Inclusion and exclusion criteria are presented in Table 1. All participants initially complete the Phase 1 screening questionnaire to assess their likely eligibility for one of the four groups. If participants meet screening criteria, they are invited to take part in a psychiatric diagnostic interview to confirm eligibility (Phase 2). All ineligible participants, including those who prefer not to complete sample collection, are invited to complete the ancillary questionnaire-only component.

#### ***Depression and anxiety group***

Participants in this group must meet current diagnostic criteria for at least one of six depressive and/or anxiety disorders at Phase 2, as assessed by the Structured Clinical Interview for DSM-5 Research Version (SCID-5-RV; [33]). Specific disorders for inclusion are: Major Depressive Disorder, Persistent Depressive Disorder, Social Anxiety Disorder, Panic Disorder, Agoraphobia, and Generalized Anxiety Disorder. Participants with a comorbid Specific Phobia, Obsessive-Compulsive or Related Disorder, Trauma- or Stressor-Related Disorder, Sleep Disorder, and/or Externalizing Disorder, as assessed in the SCID-5-RV, are included if they also meet criteria for one of the six target disorders. Given the possibility that participants may experience a Major Depressive Episode of relatively brief duration (minimum of two weeks), those reporting Major Depressive Disorder can be included if they meet full criteria at the time of assessment, or if the disorder is in partial remission (i.e., where symptoms of the previous episode are present, but full criteria are not met; or there is a period lasting less than 2 months without any significant symptoms of a major depressive episode following the end of such an episode). Participants in this group must have no lifetime history of IBS and must not meet current diagnostic criteria for IBS or another FGID.

#### ***Irritable bowel syndrome group***

Participants must meet current criteria for IBS, as assessed by the Rome IV during Phase

1  
2  
3 1 screening questionnaires [34,35]. The Rome IV assesses gastrointestinal symptom duration and  
4 delineates diagnosis by the prominent altered stool type: constipation (IBS-C), diarrhoea (IBS-  
5 D), mixed (IBS-M), or an unspecified dominance (IBS-U). Participants in this group must not  
6 meet lifetime diagnostic criteria for any of the DSM-5 disorders mentioned above (including  
7 Specific Phobia, etc).  
8  
9

### 10 11 12 ***Comorbid irritable bowel syndrome and anxiety/depression group***

13 Consistent with measures outlined above, participants must currently meet criteria for  
14 IBS and diagnosis of at least one of the six primary anxiety and/or depressive disorders.  
15

### 16 17 ***Control group***

18 Participants in this group must have no lifetime history of IBS, must not meet current  
19 diagnostic criteria for IBS or another FGID, and must not meet lifetime diagnostic criteria for  
20 any of the DSM-5 disorders mentioned above (i.e., current or past).  
21  
22  
23

### 24 25 **Exclusion criteria for the primary case-control component (all groups)**

#### 26 ***Physical health***

27  
28 Participants are excluded from all groups if they report or present with current obesity,  
29 hypertension, cardiovascular disease, respiratory disease, diabetes mellitus, liver cirrhosis, fatty  
30 liver disease, inflammatory bowel disease, coeliac disease, other autoimmune disease, short  
31 bowel syndrome, or a history of abdominal surgery that involved cutting into the GI tract.  
32  
33 Participants who report daily cigarette smoking, a recent colonoscopy (past 12 months), or who  
34 are pregnant/lactating are also excluded.  
35  
36  
37

#### 38 ***Mental health***

39  
40 Participants are excluded if they have a lifetime history of a clinical psychotic symptom  
41 or disorder, Bipolar Disorder, Somatic Symptom or Related Disorder, or over the past 12 months  
42 meet criteria for either a Feeding and Eating Disorder or an Alcohol or Substance Use Disorder  
43 (at Phase 1 questionnaires or Phase 2 SCID-5 interview).  
44  
45  
46

#### 47 ***Medication***

48  
49 Participants are excluded if they report use of anti-depressants, anxiolytics, other  
50 psychotropics, steroids, probiotics, prebiotics or synbiotics in the past four weeks. They are also  
51 excluded if they have a current bacterial, fungal, or viral infection, or if they have used non-  
52 steroidal anti-inflammatory drugs or antifungal medications in the past two weeks. Specific diets  
53 may be used to alleviate GI symptoms (e.g., FODMAP exclusion, casein-free), and therefore  
54  
55  
56  
57  
58  
59  
60



1  
2  
3 participants without IBS are excluded if they are following a restrictive diet (i.e., do not meet  
4 IBS criteria, potentially due to alleviation of symptoms via diet).

5  
6  
7 **Inclusion criteria for the ancillary questionnaire-only component**

8 Females aged 18-40 who are ineligible for the primary case-control component, or who  
9 elect not to collect biological samples, are invited to complete the ancillary questionnaire-only  
10 component. No strict eligibility criteria apply, although all participants are required to provide  
11 informed consent and demonstrate adequate comprehension of English. All participants in the  
12 case-control component complete the same questionnaires. The phases of participation in the  
13 Bugs and Brains Study are presented in Figure 1.  
14  
15  
16  
17  
18  
19  
20  
21  
22  
23  
24  
25  
26  
27  
28  
29  
30  
31  
32  
33  
34  
35  
36  
37  
38  
39  
40  
41  
42  
43  
44  
45  
46  
47  
48  
49  
50  
51  
52  
53  
54  
55  
56  
57  
58  
59  
60



**Table 1.** Inclusion criteria for full participation in the Bugs and Brains Study (i.e., primary case-control component)

| Inclusion criteria                                                                                  | Controls | Depression/Anxiety | IBS | Depression/Anxiety and IBS |
|-----------------------------------------------------------------------------------------------------|----------|--------------------|-----|----------------------------|
| Female sex                                                                                          | ✓        | ✓                  | ✓   | ✓                          |
| Fluent in English                                                                                   | ✓        | ✓                  | ✓   | ✓                          |
| Capacity to provide consent                                                                         | ✓        | ✓                  | ✓   | ✓                          |
| Live in Melbourne or Geelong (Australia)                                                            | ✓        | ✓                  | ✓   | ✓                          |
| Meet DSM-5 criteria for current Depression or Anxiety disorder*                                     | X        | ✓                  | X   | ✓                          |
| OCD, specific phobia, Trauma- or stressor-related disorder, Sleep Disorder, Externalizing disorders | X        | -                  | X   | -                          |
| Irritable bowel syndrome (Rome IV)                                                                  | X        | X                  | ✓   | ✓                          |

Notes. ✓= inclusion criteria; X= exclusion criteria (current or lifetime history [as assessed by SCID-5-RV]); - = neither exclusion nor inclusion; \* Specific disorders for inclusion are: Major Depressive Disorder, Persistent Depressive Disorder, Social Anxiety Disorder, Panic Disorder, Agoraphobia, and Generalized Anxiety Disorder as assessed by the Structured Clinical Interview for the Diagnostic and Statistical Manual fifth edition, research version (SCID-5-RV)

[INSERT FIGURE 1 HERE]

## Phases of participation

### *Phase 1 - screening questionnaire (all participants)*

Participants who provide informed consent are sent a Phase 1 questionnaire link online, using Qualtrics (Provo, UT). This component takes approximately 20 minutes and comprises a brief demographic overview, the Psychiatric Diagnostic Screening Questionnaire (PDSQ; [36]), and the Rome IV IBS module [34]. It also captures participants' regular diet category (e.g., omnivore, low FODMAP), medication/supplement use, and alcohol/substance use. Eligible participants are invited for Phase 2 screening. Excluded participants are invited to complete Phase 4 questionnaires as part of the ancillary component (bypassing Phases 2 and 3).

### *Phase 2 - assessment of current and past mental health diagnoses (SCID-5; case-control component only)*

Participants invited for the primary case-control component are administered the SCID-5-RV [33] to further assess eligibility. Interviews are conducted in-person at the University of Melbourne or online via video application. Trained interviewers administer a modified version of the SCID-5-RV to assess the inclusion and exclusion psychiatric disorders, described in detail in Supplementary Materials. Researchers also collect a hospitalisation and mental health treatment history (e.g., psychotherapeutic and pharmacological) and assess functioning using the Global Assessment of Functioning (GAF) and Social and Occupational Functioning Assessment Scale (SOFAS) [37]. All interviewers hold a tertiary degree in psychological sciences or related fields, are trained in diagnostic psychological interviewing, and are required to complete Management of Clinical Aggression training (MOCA) [38] and Applied Suicide Intervention Skills Training (ASIST, LivingWorks). Fortnightly clinical meetings are conducted with the research clinical psychologist (OS) to maintain interviewer consistency and discuss any risks presented by participants. Interrater reliability will be conducted for at least 20% of interviews from eligible participants to assess diagnostic-level consistency.

### ***Phase 3 - sample collection and anthropometrics (case-control component only)***

In Phase 3 of the study, participants collect biological samples in their own home. Instructions are provided verbally and included in written form with the collection kits. On day one, a stool sample is collected; on day two, a urine sample and saliva sample are collected on awakening; on day three, another saliva sample is collected at awakening. Instructions on sterile storage are provided, and samples are immediately placed in participants' freezers following collection. A home visit is scheduled to pick up the biological samples, collect the hair sample, and take anthropometric measurements (height, weight and waist circumference), ideally within one week of collection. Samples are then transported on ice to the university and stored at -80 °C until processing.

**Faecal sample.** Participants collect a faecal sample at first bowel movement on day 1 of sample collection, but not if they are menstruating or sick. Participants are asked to wait at least three days after they cease menses to begin collection, and to not collect samples within one week of menstruation, due to the effect of menstrual cycling on endocrine outcomes [39]. A preliminary literature also describes an oestrogen-gut microbiota axis [40], therefore we sought to avoid peaks in oestrogen secretion that may confound microbial analyses. Prior to sample collection, participants are also asked to consume a diet 'normal for them' for at least two weeks. Approximately 2.5 g is collected into sterile faecal collection containers. Participants are instructed not to collect the faecal sample if they have very loose stools, and to wait until they return to a firmer state (i.e., Bristol stool chart type 5 or 6, if diarrhoea is frequent).

**Urine sample.** A mid-stream urine sample of approximately 10 to 20 mL is collected on day 2 (at first urination) into sterile urine specimen containers (the day after faecal sample collection).

**Saliva sample.** Participants collect two 3 mL saliva samples (by passive drool), one per day across two days (day 2 and day 3), into 10 mL Techno Plas sterile centrifuge tubes. Saliva samples are collected at awakening before eating or drinking. Participants are asked to complete a brief saliva record form.

**Hair sample.** A hair sample is collected by researchers at participants' homes. Hair sampling is carried out by combing and pinning the surrounding hair with clips, such that a 2 cm long by 0.5 cm wide scalp area is isolated on the posterior vertex (back of the head below the

1  
2  
3 inion;  $\sim 1 \text{ cm}^2$ ). Hair is then bound together (marking the scalp end) and cut with blunt-nose  
4 scissors as close to the scalp as possible.

5  
6 ***Phase 4 - additional questionnaire data (all participants)***

7  
8 Participants receive the Phase 4 questionnaires online, via Qualtrics. Phase 4  
9 questionnaires are completed within 24 hours of faecal sample collection. Participants in the  
10 ancillary questionnaire-only study complete Phase 4 questionnaires following Phase 1 (or  
11 whichever phase they are excluded from the case-control component). The Phase 4  
12 questionnaires cover demographic information (e.g., country of birth), early life history (e.g.,  
13 mode of birth, breastfeeding), history of gastric infections, and scales assessing psychopathology  
14 symptoms, stressful life events, early life adversity, diet, emotion regulation, and oral and  
15 physical health. The Phase 4 questionnaires take approximately 60 min. All questionnaires  
16 included in the Bugs and Brains Study are displayed in Table 2.  
17  
18  
19  
20  
21  
22  
23  
24  
25  
26  
27  
28  
29  
30  
31  
32  
33  
34  
35  
36  
37  
38  
39  
40  
41  
42  
43  
44  
45  
46  
47  
48  
49  
50  
51  
52  
53  
54  
55  
56  
57  
58  
59  
60

**Table 2.** Summary of questionnaire measures included in the Bugs and Brains Study

| Category                                | Questionnaire                                                                                                                                                                                                                                                                                         | Phase 1<br>(Screening<br>questionnaire) | Phase 2<br>(SCID-5-RV<br>interview) | Phase 4<br>(During sample<br>collection) |
|-----------------------------------------|-------------------------------------------------------------------------------------------------------------------------------------------------------------------------------------------------------------------------------------------------------------------------------------------------------|-----------------------------------------|-------------------------------------|------------------------------------------|
| <b>Demographic information</b>          | Phase 1 Health Questionnaire*                                                                                                                                                                                                                                                                         | ✓                                       |                                     |                                          |
|                                         | Phase 4 Demographics, Health and Exercise Questionnaire*                                                                                                                                                                                                                                              |                                         |                                     | ✓                                        |
| <b>Emotional functioning</b>            | Difficulties in Emotion Regulation Scale (DERS) [41]                                                                                                                                                                                                                                                  |                                         |                                     | ✓                                        |
| <b>Mental health and behaviour</b>      | Psychiatric Diagnostic Screening Questionnaire (PDSQ) [36]                                                                                                                                                                                                                                            | ✓                                       |                                     |                                          |
|                                         | Global Assessment of Functioning (GAF) † [37]                                                                                                                                                                                                                                                         |                                         | ✓                                   |                                          |
|                                         | Social and Occupational Functioning Assessment Scale (SOFAS) † [37]                                                                                                                                                                                                                                   |                                         | ✓                                   |                                          |
|                                         | Beck Depression Inventory (BDI-II) [42]                                                                                                                                                                                                                                                               |                                         |                                     | ✓                                        |
|                                         | Beck Anxiety Inventory (BAI) [43]                                                                                                                                                                                                                                                                     |                                         |                                     | ✓                                        |
|                                         | Adult Self Report (ASR) [44]                                                                                                                                                                                                                                                                          |                                         |                                     | ✓                                        |
| <b>Diet</b>                             | Dietary Questionnaire for Epidemiological Studies (DQES) [45]                                                                                                                                                                                                                                         |                                         |                                     | ✓                                        |
|                                         | Phase 1 Health Questionnaire* <ul style="list-style-type: none"> <li>Specific diet information (past four weeks; e.g. gluten-free, specific carbohydrates, FODMAP, vegetarian)</li> </ul>                                                                                                             | ✓                                       |                                     |                                          |
| <b>Exercise</b>                         | Phase 4 Demographics, Health and Exercise Questionnaire*                                                                                                                                                                                                                                              |                                         |                                     | ✓                                        |
| <b>Quality of life/wellbeing</b>        | The World Health Organization quality of life assessment (WHOQOL-BREF) [46]                                                                                                                                                                                                                           |                                         |                                     | ✓                                        |
| <b>Oral health</b>                      | The World Health Organization Oral Health Questionnaire for Adults [47]                                                                                                                                                                                                                               |                                         |                                     | ✓                                        |
| <b>Physical health /medical history</b> | The Physical Health Questionnaire (PHQ) [48]                                                                                                                                                                                                                                                          |                                         |                                     | ✓                                        |
|                                         | Phase 1 Health Questionnaire* <ul style="list-style-type: none"> <li>Current bacterial, fungal, or viral infection</li> <li>Obesity, hypertension, cardiovascular disease, respiratory disease, diabetes mellitus, liver cirrhosis, fatty liver disease, coeliac disease, other autoimmune</li> </ul> | ✓                                       |                                     |                                          |

| Category                               | Questionnaire                                                                                                                                                                                                                                                                                                                                                                                                                                                                      | Phase 1<br>(Screening<br>questionnaire) | Phase 2<br>(SCID-5-RV<br>interview) | Phase 4<br>(During sample<br>collection) |
|----------------------------------------|------------------------------------------------------------------------------------------------------------------------------------------------------------------------------------------------------------------------------------------------------------------------------------------------------------------------------------------------------------------------------------------------------------------------------------------------------------------------------------|-----------------------------------------|-------------------------------------|------------------------------------------|
|                                        | disease (e.g., rheumatoid arthritis, lupus, etc.), and polycystic ovary syndrome (PCOS).<br><ul style="list-style-type: none"> <li>• Current pregnancy/lactation</li> <li>• Mode of birth</li> <li>• Medication (past month): anti-depressants/anti-anxiolytics, antibiotics, psychotropics, oral or injected steroids, probiotics, prebiotics, synbiotics, dietary supplements including laxatives, other</li> </ul> Medication (past two weeks): NSAIDs, probiotics, antifungals |                                         |                                     |                                          |
| <b>Gastrointestinal health/history</b> | Rome IV Diagnostic Questionnaire (R4DQ) [34]                                                                                                                                                                                                                                                                                                                                                                                                                                       | ✓                                       |                                     |                                          |
|                                        | Phase 1 Health Questionnaire* <ul style="list-style-type: none"> <li>• Non-surgical procedures related to the digestive system (past six months): enema, colonoscopy, gastroscopy</li> </ul> Inflammatory bowel disease (e.g., ulcerative colitis, Crohn’s disease), short bowel syndrome, history of abdominal surgery (e.g., appendectomy, ileostomy, bowel surgery, caesarean section, etc.),                                                                                   | ✓                                       |                                     |                                          |
|                                        | Phase 4 Demographics, Health and Exercise Questionnaire* <ul style="list-style-type: none"> <li>• Lifetime history of gastric infections: Salmonella, Shigella, Campylobacter, Giardia, Virus, Other</li> </ul>                                                                                                                                                                                                                                                                    |                                         |                                     | ✓                                        |
| <b>Stressful life events</b>           | The Lifetime Incidence of Traumatic Events (LITE) [49]                                                                                                                                                                                                                                                                                                                                                                                                                             |                                         |                                     | ✓                                        |
|                                        | Childhood Trauma Questionnaire (CTQ) [50]                                                                                                                                                                                                                                                                                                                                                                                                                                          |                                         |                                     | ✓                                        |
| <b>Substance use</b>                   | Phase 1 Health Questionnaire* <ul style="list-style-type: none"> <li>• Alcohol (past month)</li> <li>• Smoking (past month): tobacco cigarettes, vape, e-cigarettes containing nicotine</li> </ul> Illicit drug use (past month)                                                                                                                                                                                                                                                   | ✓                                       |                                     |                                          |

| Category | Questionnaire                                                                                                   | Phase 1<br>(Screening<br>questionnaire) | Phase 2<br>(SCID-5-RV<br>interview) | Phase 4<br>(During sample<br>collection) |
|----------|-----------------------------------------------------------------------------------------------------------------|-----------------------------------------|-------------------------------------|------------------------------------------|
|          | <ul style="list-style-type: none"> <li>Dietary Questionnaire for Epidemiological Studies (DQES) [45]</li> </ul> |                                         |                                     | ✓                                        |

*Notes.* \* = designed specifically for the Bugs and Brains Study; † = measure completed by researchers, rather than participants; ‡ = modified version utilised, see Supplementary Materials; NSAIDS= nonsteroidal anti-inflammatory drugs; SCID-5-RV = Structured Clinical Interview for the Diagnostic and Statistical Manual fifth edition, research version

### **Gut and oral microbiota sequencing**

Amplicon 16S ribosomal ribonucleic acid (rRNA) gene sequencing will be used to estimate participants' microbiota from a faecal sample (gut microbiota) and a saliva sample (oral microbiota). Genomic DNA will be extracted using DNeasy PowerSoil® HTP kit (QIAGEN) and amplified using universal prokaryotic 515F and 806R primers targeting the V4 region of the 16S gene [51]. Sequences will be generated using paired-end sequencing on the Illumina MiSeq platform. Should additional funding be secured, shotgun metagenomic sequencing will be performed.

### **Metabolomics**

Nuclear magnetic resonance spectroscopy (NMR) will be run on faecal and urine samples to quantify metabolites. If additional funding is obtained, mass spectrometry metabolite assays will also be conducted.

### ***Sample Preparation***

**Faecal water.** A small proportion of the frozen faecal sample (0.5-1 g) will be homogenized by vortex in deuterated saline (0.9% NaCl) at 1:5 w/v before being centrifuged ( $3,200 \times g$ ) at 4 °C for 15 min. Faecal water will be syringe filtered (0.22 µm, 33 mm diameter) and dispensed into 700 µL aliquots.

**Urine.** Frozen urine samples will be thawed in ice baths, syringe filtered (0.22 µm, 33 mm diameter) and each dispensed into 700 µL aliquots.

**Metabolite extraction.** Faecal and urine samples will be prepared for NMR analysis using a liquid-liquid extraction technique [52]. A 250 µL aliquot of each faecal water/urine sample will be added to 250 µL ice-cold deuterated chloroform and 250 µL ice-cold deuterated methanol and mixed by vortex before being left on ice for 15 min. Samples are then centrifuged ( $16,000 \times g$ ) at 4 °C for 10 min to produce a biphasic mixture with a hydrophilic phase of water/deuterated methanol containing polar metabolites and lipophilic phase of deuterated chloroform containing lipophilic compounds.

### ***Nuclear magnetic resonance spectroscopy (NMR)***

A 297 µL sample of the top hydrophilic layer will be added to equal volume of 200 mM sodium phosphate in  $^2\text{H}_2\text{O}$  (pH 7.4) and 66 µL of  $^2\text{H}_2\text{O}$  containing 5 mM 3-(Trimethylsilyl)-1-propanesulfonic acid-d6 sodium salt and 0.2% (w/v) sodium azide to make a total of 660 µL. The



1  
2  
3 sample will be mixed by vortex, centrifuged at  $16,000 \times g$  for 1 min, and 550  $\mu\text{L}$  of supernatant  
4 transferred to a 7-inch 5-mm 507-grade Bruker NMR tube for NMR analysis.

5  
6 All NMR spectra of faecal water and urine will be collected using Bruker 600 MHz  
7 spectrometer set to a constant temperature of 300 K. Standard 1D  $^1\text{H}$  spectra will be acquired for  
8 faecal water using 1D NOESY pulse sequence (recycle delay- $90^\circ$ - $t_1$ - $90^\circ$ - $t_m$ -acquire) with  $t_1$   
9 corresponding to 3  $\mu\text{s}$ ,  $t_m$  to 10 ms and the  $90^\circ$  pulses optimised. Water suppression will be  
10 achieved by pre-saturation of the water signal during  $t_m$  and the recycle delay (4 s). Each  
11 spectrum will be collected over 64 K data points and 256 scans with spectral width of 20 ppm  
12 [53].  
13  
14  
15  
16  
17  
18

19 Urine spectra are acquired using the same 1D NOESY pulse sequence where recycle  
20 delay corresponded to 2 s,  $t_1$  to 3  $\mu\text{s}$  and  $t_m$  to 10 ms. Each spectrum will be collected over 32 K  
21 data points and 64 scans with spectral width of 20 ppm [54]. Using the Chenomx NMR Suite  
22 Professional software package, the free induction decay is multiplied by 0.3 Hz exponential line  
23 broadening and zero-filled before Fourier transformation. Spectra are manually phased, baseline  
24 corrected and referenced to DSS with a chemical shift of 0 ppm. The compound libraries in the  
25 Chenomx software will be used to identify and quantitate metabolites in the NMR 1D  $^1\text{H}$  spectra  
26 based on their characteristic chemical shifts using 5 mM DSS as an internal chemical shift  
27 reference.  
28  
29  
30  
31  
32  
33

### 34 **Immune and endocrine assays**

35  
36 Hormones will be assayed from hair and saliva samples to estimate longer and shorter-  
37 term endocrine functioning, respectively. The hormones cortisol, DHEA and testosterone will be  
38 assayed to provide an indication of hypothalamic-pituitary-adrenal axis secretion. Systemic  
39 inflammation will be estimated using the acute phase C-reactive protein (CRP), as previously  
40 described [55]. Assays for hormones and CRP will be conducted using enzyme-linked  
41 immunosorbent assay kits and performed in duplicate, following manufacturer protocols.  
42  
43  
44  
45

### 46 **Pre-processing of bacterial sequencing data**

47  
48 Sequencing reads will be quality filtered, trimmed, denoised and merged using QIIME2  
49 [56]. The DADA2 denoising pipeline will be used for correcting sequence errors and identifying  
50 amplicon sequence variants (ASVs, i.e., sequences not containing errors) [57]. ASVs will be  
51 taxonomically assigned using a Naïve-Bayes classifier against the most recent version of the  
52  
53  
54  
55  
56  
57  
58  
59  
60

Human Oral Microbiome Database (saliva) and SILVA databases (faecal). Sequences will be aligned using MAFFT [58], and phylogeny built using FastTree 2 [59].

### Sample size calculation

A sample of 132 would provide 80% power at  $p = 0.01$  to detect an effect size of 0.35 when comparing outcomes across the four groups (i.e., anxiety/depression, IBS, comorbidity, controls). This estimate is conservative given the effect sizes reported in related research, and our sample size of 160 exceeds this recommendation.

### Data analysis

Proposed analyses will be discipline-specific (microbial, metabolomics, immune and endocrine), but will also utilise systems biology to integrate the wide range of acquired biological, health, and psychosocial data. General linear models will investigate the relationships between mental health, dietary patterns, exercise, GI health, oral health, early life adversity, substance use (including alcohol), and medical history in the questionnaire-only ancillary study. These analyses may inform necessary metadata to consider in analyses of the primary case-control component. Sources of inter-study variation identified in previous investigations of the gut microbiota will be examined [31, 60].

A primary aim of the case-control component involves characterising and comparing the microbiota and metabolome in the four participant groups (i.e., anxiety/depression, IBS, comorbidity, controls). Between and within-sample diversity will be conducted using alpha diversity (Shannon and Simpson indices, Faith's phylogenetic diversity, observed number of ASVs [richness]), and beta diversity (PCoA using weighted and unweighted UniFrac distances, examined statistically using PERMANOVA). Differential abundance of microbial taxa will be examined at several levels of the taxonomy (phylum, order, family, genus levels) using packages suited to compositional data: ANCOM-BC [61] and MaAsLin2 [62], correcting for multiple comparisons (Benjamini Hochberg False Discovery Rate). Associations between taxa abundance and metadata will also be analysed using these packages. All statistical analyses and graphical representations will be conducted using R, with packages that enable multivariate modelling and visualizations (e.g., vegan [63]; phyloseq [64]; ggplot2 [65]; ANCOM-BC [61]; MaAsLin2 [62]). It will also integrate the wide range of biological data and adopt a systems biology approach using the package mixOmics [66].

### Ethics and dissemination

1  
2  
3 Ethical approval for this project was granted by the University of Melbourne Human  
4 Research Ethics Committee (#1749221). After reading our Plain Language Statement, a  
5 comprehensive consent procedure is conducted via telephone with all participants. The voluntary  
6 nature of the study is explained, including the limits of confidentiality, the secure and de-  
7 identified nature of all data, and the right to withdraw at any time without prejudice or  
8 explanation. Verbal consent is recorded at the end of the first phone call, should the participant  
9 wish to begin their participation. Written consent is obtained from participants in the case-control  
10 component following sample collection.  
11  
12  
13  
14  
15  
16

### 17 **Patient and public involvement**

18 There were no funds or time allocated for patient and public involvement, therefore we  
19 were unable to engage patients in study design and recruitment. We have invited patients to  
20 assist with the development of our dissemination strategy.  
21  
22  
23

### 24 **Progress to date**

25 Of the 775 participants who have completed the Phase 1 questionnaire since the end of  
26 2017, 211 have met screening criteria and were invited to the SCID-5-RV interview (Phase 2).  
27 At interview, 53 participants met exclusion criteria relating to psychiatric diagnosis. Several  
28 participants were unable to complete kit collection, moved locations, or began exclusionary  
29 medications. Accordingly, 140 of 160 participants have completed the case-control component.  
30 A total of 352 of the planned 1000 participants have completed the ancillary questionnaire-only  
31 component (Phases 1 and 4).  
32  
33  
34  
35  
36  
37

### 38 **Discussion**

39 The high rates of co-occurrence between anxiety, depression and IBS remain poorly  
40 understood, although interactions between host physiology and the microbiota provide a  
41 promising avenue to investigate possible shared underlying mechanisms. The Bugs and Brains  
42 Study will be the first research project to investigate and compare the oral and gut microbiota  
43 and metabolome of participants with anxiety/depression, IBS, comorbid anxiety/depression and  
44 IBS, and controls, as assessed by clinical diagnosis and gold standard criteria. Moreover, it will  
45 analyse hypothesised underlying mechanisms, including immune, endocrine, and microbial  
46 factors, and maintain strict inclusion and exclusion criteria. The questionnaire-only study will  
47 examine correlates of GI and mental health symptoms that have been insufficiently examined to  
48 date, including diet, exercise, oral health, substance use, medical history, early life adversity and  
49  
50  
51  
52  
53  
54  
55  
56  
57  
58  
59  
60

1  
2  
3 psychosocial factors. Via a comprehensive analysis of symptom-based questionnaire data and  
4 detailed characterisation of physiological, microbial and psychological profiles, the Bugs and  
5 Brains Study may inform the development of targeted interventions for the millions of  
6  
7 individuals living with anxiety, depression and/or IBS.  
8  
9

### 11 **Author contributions**

12 JGS conceived the study, with critical input from NH, OS, SW, CAS, BC, SD, PG, NOS, CB,  
13 KH, and DE. CAS, JGS and KH wrote the manuscript, and CAS devised the analytical strategy.  
14 All authors critically revised and approved the final manuscript.  
15  
16  
17

### 18 **Funding statement**

19 This research is funded by the Melbourne School of Psychological Sciences. Carra Simpson is  
20 supported by the Australian Government Research Training Program. This work was funded by  
21 the National Health and Medical Research Council (Career Development Fellowship to SW, ID  
22 1125504).  
23  
24  
25  
26

27 **Competing interests statement:** None declared

### 28 **Acknowledgments**

29 Authors would like to thank all staff, students, and volunteers on the Bugs and Brains Study, as  
30 well as all participants who graciously gave their time to this research. Authors report no actual  
31 or perceived conflicts of interest.  
32  
33  
34  
35

### 36 **Figure caption**

37 *Figure 1.* Phases of participation in the Bugs and Brains Study. Participants eligible for the  
38 primary case-control component at Phases 1 and 2 complete all phases of the study within a  
39 month, including biological sample collection ( $N = 160$ ;  $n = 40$  with IBS,  $n = 40$  with anxiety  
40 and/or depressive disorder,  $n = 40$  with IBS and anxiety and/or depressive disorder,  $n = 40$   
41 controls with no lifetime history of either IBS or an anxiety/depressive disorder). Participants  
42 who decline sample collection, or are not eligible for the primary component, complete the  
43 questionnaire-only ancillary component (Phases 1 and 4;  $N = 1000$ ). GAF = Global Assessment  
44 of Functioning; IBS = irritable bowel syndrome; SOFAS = Social and Occupational Functioning  
45 Assessment Scale; Structured Clinical Interview for the Diagnostic and Statistical Manual  
46 (DSM) 5<sup>th</sup> edition (Research version [SCID-5-RV]). Created with BioRender.com.  
47  
48  
49  
50  
51  
52  
53  
54  
55  
56  
57  
58  
59  
60

## References

- 1 Neuman H, Debelius JW, Knight R, *et al*. Microbial endocrinology: the interplay between the microbiota and the endocrine system. *FEMS Microbiol Rev* 2015;**39**:509–21. doi:10.1093/femsre/fuu010
- 2 Kamada N, Seo SU, Chen GY, *et al*. Role of the gut microbiota in immunity and inflammatory disease. *Nat Rev Immunol* 2013;**13**:321–35. doi:10.1038/nri3430
- 3 Sikander A, Rana SV, Prasad KK. Role of serotonin in gastrointestinal motility and irritable bowel syndrome. *Clin Chim Acta* 2009;**403**:47–55. doi:10.1016/j.cca.2009.01.028
- 4 Martinez FD. The human microbiome. Early life determinant of health outcomes. *Ann Am Thorac Soc* 2014;**11 Suppl 1**:S7-12. doi:10.1513/AnnalsATS.201306-186MG
- 5 Lovell RM, Ford AC. Global Prevalence of and Risk Factors for Irritable Bowel Syndrome: A Meta-analysis. *Clin Gastroenterol Hepatol* 2012;**10**:712–21. doi:10.1016/j.cgh.2012.02.029
- 6 World Health Organization. Depression and Other Common Mental Health Disorders: Global Health Estimates. 2017.<http://apps.who.int/iris/bitstream/handle/10665/254610/WHO-MSD-MER-2017.2-eng.pdf;jsessionid=D7B089CDA4A6FD66BD711AE0E39C4511?sequence=1> (accessed 17 Jul 2019).
- 7 Pinto-Sanchez MI, Ford AC, Avila CA, *et al*. Anxiety and depression increase in a stepwise manner in parallel with multiple FGIDs and symptom severity and frequency. *Am J Gastroenterol* 2015;**110**:1038–48. doi:10.1038/ajg.2015.128
- 8 Banerjee A, Sarkhel S, Sarkar R, *et al*. Anxiety and Depression in Irritable Bowel Syndrome. *Indian J Psychol Med* 2017;**39**:741–5. doi:10.4103/IJPSYM.IJPSYM\_46\_17
- 9 Fond G, Loundou A, Hamdani N, *et al*. Anxiety and depression comorbidities in irritable bowel syndrome (IBS): a systematic review and meta-analysis. *Eur Arch Psychiatry Clin Neurosci* Published Online First: 2014. doi:10.1007/s00406-014-0502-z
- 10 Kurokawa S, Kishimoto T, Mizuno S, *et al*. The effect of fecal microbiota transplantation

- 1  
2  
3 on psychiatric symptoms among patients with irritable bowel syndrome, functional  
4 diarrhea and functional constipation: An open-label observational study. *J Affect Disord*  
5 2018;**235**:506–12. doi:10.1016/j.jad.2018.04.038  
6  
7  
8  
9 11 Sibelli A, Chalder T, Everitt H, *et al.* A systematic review with meta-analysis of the role  
10 of anxiety and depression in irritable bowel syndrome onset. *Psychol Med* 2016;**46**:3065–  
11 80. doi:10.1017/S0033291716001987  
12  
13  
14  
15 12 Jiang H, Zhang X, Yu Z, *et al.* Altered gut microbiota profile in patients with generalized  
16 anxiety disorder. *J Psychiatr Res* 2018;**104**:130–6. doi:10.1016/j.jpsychires.2018.07.007  
17  
18  
19 13 Winter G, Hart RA, Charlesworth RPG, *et al.* Gut microbiome and depression: What we  
20 know and what we need to know. *Rev Neurosci* 2018;**29**:629–43. doi:10.1515/revneuro-  
21 2017-0072  
22  
23  
24  
25 14 Simpson CA, Mu A, Haslam N, *et al.* Feeling down? A systematic review of the gut  
26 microbiota in anxiety/depression and irritable bowel syndrome. *J Affect Disord*  
27 2020;**266**:429–46. doi:10.1016/j.jad.2020.01.124  
28  
29  
30  
31 15 Pittayanon R, Lau JT, Yuan Y, *et al.* Gut microbiota in patients with irritable bowel  
32 syndrome-a systematic review. *Gastroenterology* 2019;**157**:97–108.  
33  
34  
35 16 Aizawa E, Tsuji H, Asahara T, *et al.* Possible association of Bifidobacterium and  
36 Lactobacillus in the gut microbiota of patients with major depressive disorder. *J Affect*  
37 *Disord* 2016;**202**:254–7. doi:10.1016/j.jad.2016.05.038  
38  
39  
40  
41 17 Liu Y, Zhang L, Wang X, *et al.* Similar Fecal Microbiota Signatures in Patients With  
42 Diarrhea-Predominant Irritable Bowel Syndrome and Patients With Depression. *Clin*  
43 *Gastroenterol Hepatol* 2016;**14**:1602-1611.e5. doi:10.1016/j.cgh.2016.05.033  
44  
45  
46  
47 18 Tap J, Derrien M, Törnblom H, *et al.* Identification of an Intestinal Microbiota Signature  
48 Associated With Severity of Irritable Bowel Syndrome. *Gastroenterology* 2017;**152**:111-  
49 123.e8. doi:10.1053/j.gastro.2016.09.049  
50  
51  
52  
53 19 Labus JS, Hollister EB, Jacobs J, *et al.* Differences in gut microbial composition correlate  
54 with regional brain volumes in irritable bowel syndrome. *Microbiome* 2017;**5**:1–17.  
55 doi:10.1186/S40168-017-0260-Z  
56  
57  
58  
59

- 1  
2  
3 20 Sundin J, Rangel I, Fuentes S, *et al.* Altered faecal and mucosal microbial composition in  
4 post-infectious irritable bowel syndrome patients correlates with mucosal lymphocyte  
5 phenotypes and psychological distress. *Aliment Pharmacol Ther* 2015;**41**:342–51.  
6 doi:10.1111/apt.13055  
7  
8  
9  
10  
11 21 Deo PN, Deshmukh R. Oral microbiome: Unveiling the fundamentals. *J Oral Maxillofac*  
12 *Pathol* 2019;**23**:122–8. doi:10.4103/jomfp.JOMFP\_304\_18  
13  
14  
15 22 Turnbaugh PJ, Ley RE, Hamady M, *et al.* The human microbiome project. *Nature*  
16 2007;**449**.  
17  
18  
19 23 Olsen I, Yamazaki K. Can oral bacteria affect the microbiome of the gut? *J Oral*  
20 *Microbiol* 2019;**11**:1586422. doi:10.1080/20002297.2019.1586422  
21  
22  
23 24 Simpson CA, Adler C, du Plessis MR, *et al.* Oral microbiome composition, but not  
24 diversity, is associated with adolescent anxiety and depression symptoms. *Physiol Behav*  
25 2020;**226**:113126. doi:10.1016/j.physbeh.2020.113126  
26  
27  
28  
29 25 Valles-Colomer M, Falony G, Darzi Y, *et al.* The neuroactive potential of the human gut  
30 microbiota in quality of life and depression. *Nat Microbiol* 2019;**4**:623–32.  
31 doi:10.1038/s41564-018-0337-x  
32  
33  
34  
35 26 Flowers SA, Ellingrod VL. The Microbiome in Mental Health: Potential Contribution of  
36 Gut Microbiota in Disease and Pharmacotherapy Management. *Pharmacotherapy*. 2015.  
37 doi:10.1002/phar.1640  
38  
39  
40  
41 27 Capurso G, Lahner E. The interaction between smoking, alcohol and the gut microbiome.  
42 *Best Pract Res Clin Gastroenterol* 2017;**31**:579–88. <http://10.0.3.248/j.bpg.2017.10.006>  
43  
44  
45 28 Ma Z (Sam), Li W. How and Why Men and Women Differ in Their Microbiomes:  
46 Medical Ecology and Network Analyses of the Microgenderome. *Adv Sci*  
47 2019;**6**:1902054. doi:10.1002/advs.201902054  
48  
49  
50  
51 29 Dash S, Clarke G, Berk M, *et al.* The gut microbiome and diet in psychiatry: focus on  
52 depression. *Curr Opin Psychiatry* 2015;**28**:1–6. doi:10.1097/YCO.000000000000117  
53  
54  
55 30 Kolodziejczyk AA, Zheng D, Elinav E. Diet–microbiota interactions and personalized  
56  
57  
58  
59  
60



- 1  
2  
3 nutrition. *Nat Rev Microbiol* 2019;**17**:742–53. doi:10.1038/s41579-019-0256-8  
4  
5  
6 31 Simpson CA, Schwartz OS, Simmons JG. The human gut microbiota and depression:  
7 widely reviewed, yet poorly understood. *J. Affect. Disord.* 2020;**274**:73–5.  
8 doi:10.1016/j.jad.2020.05.115  
9  
10  
11 32 Canavan C, West J, Card T. The epidemiology of irritable bowel syndrome. *Clin*  
12 *Epidemiol* 2014;**6**:71–80. doi:10.2147/CLEP.S40245  
13  
14  
15 33 First M, Williams J, Karg R, *et al.* *Structured Clinical interview for DSM-5, Research*  
16 *Version (SCID-5 for DSM-5, Research Version; SCID-5-RV)*. Arlington, VA: : American  
17 Psychiatric Association 2015.  
18  
19  
20  
21 34 Drossman DA, Hasler WL. Introduction: Rome IV—Functional GI Disorders: Disorders  
22 of Gut-Brain Interaction. *Gastroenterology* 2016;**150**:1257–  
23 61. <http://10.0.4.29/j.gastro.2016.03.035>  
24  
25  
26  
27 35 Drossman DA. Functional gastrointestinal disorders: History, pathophysiology, clinical  
28 features, and Rome IV. *Gastroenterology* 2016;**150**:1262-1279e2.  
29 doi:10.1053/j.gastro.2016.02.032  
30  
31  
32  
33 36 Zimmerman M, Mattia JI. A Self-Report Scale to Help Make Psychiatric Diagnoses: The  
34 Psychiatric Diagnostic Screening Questionnaire. *Arch Gen Psychiatry* 2001;**58**:787–94.  
35 doi:10.1001/archpsyc.58.8.787  
36  
37  
38  
39 37 American Psychiatric Association. *American Psychiatric Association: Diagnostic and*  
40 *Statistical Manual of Mental Disorders, Fourth Edition, Text Revision (DSM-IV-TR)*.  
41 Washington, DC: American Psychiatric Association 2000.  
42  
43  
44  
45 38 Gerdtz MF, Daniel C, Dearie V. The Management of Clinical Aggression-Rapid  
46 Emergency Department Intervention “MOCA-REDI”: An outcome evaluation. *Australas*  
47 *Emerg Nurs J* 2011;**14**:S12. doi:10.1016/j.aenj.2011.09.033  
48  
49  
50  
51 39 Gandara BK, Leresche L, Mancl L. Patterns of salivary estradiol and progesterone across  
52 the menstrual cycle. *Ann N Y Acad Sci* 2007;**1098**:446–50. doi:10.1196/annals.1384.022  
53  
54  
55 40 Baker JM, Al-Nakkash L, Herbst-Kralovetz MM. Estrogen–gut microbiome axis:  
56  
57  
58  
59  
60



- 1  
2  
3 Physiological and clinical implications. *Maturitas* 2017;**103**:45–53.  
4 doi:<https://doi.org/10.1016/j.maturitas.2017.06.025>  
5  
6  
7  
8 41 Gratz KL, Roemer L. Multidimensional Assessment of Emotion Regulation and  
9 Dysregulation: Development, Factor Structure, and Initial Validation of the Difficulties in  
10 Emotion Regulation Scale. *J Psychopathol Behav Assess* 2004;**26**:41–54.  
11 doi:10.1023/B:JOBA.0000007455.08539.94  
12  
13  
14  
15 42 Beck A., Steer R., Brown G. *Manual for the Beck Depression Inventory-II*. San Antonio,  
16 TX: : Psychological Corporation 1996.  
17  
18  
19 43 Beck A., Streer R. *Beck Anxiety Inventory Manual*. San Antonio, TX: : Psychological  
20 Corporation 1993.  
21  
22  
23 44 Achenbach T, Rescorla L. *Manual for the ASEBA adult forms & profiles*. Burlington: :  
24 University of Vermont, Research Center for Children, Youth, and Families 2003.  
25  
26  
27 45 Giles G, Ireland P. *Dietary Questionnaire for Epidemiological Studies (Version 3.2)*.  
28 Melbourne: Cancer Council Victoria 1996.  
29  
30  
31 46 The WHOQOL Group. The World Health Organization quality of life assessment  
32 (WHOQOL): Development and general psychometric properties. *Soc Sci Med*  
33 1998;**46**:1569–85. doi:[https://doi.org/10.1016/S0277-9536\(98\)00009-4](https://doi.org/10.1016/S0277-9536(98)00009-4)  
34  
35  
36  
37 47 World Health Organization. *Oral health surveys: Basic Methods*. 5th ed. World Health  
38 Organization 1987.  
39  
40  
41 48 Schat ACH, Kelloway EK, Desmarais S. The Physical Health Questionnaire (PHQ):  
42 construct validation of a self-report scale of somatic symptoms. *J Occup Health Psychol*  
43 2005;**10**:363–81. doi:10.1037/1076-8998.10.4.363  
44  
45  
46  
47 49 Greenwald R, Rubin A. Assessment of posttraumatic symptoms in children: Development  
48 and preliminary validation of parent and child scales. *Res. Soc. Work Pract.* 1999;**9**:61–  
49 75. doi:10.1177/104973159900900105  
50  
51  
52  
53 50 Berstein D., Fink L. *Childhood Trauma Questionnaire: A retrospective self-report*  
54 *manual*. San Antonio, TX: Psychological Corporation 1998.  
55  
56  
57  
58  
59  
60

- 1  
2  
3 51 Caporaso JG, Lauber CL, Walters WA, *et al.* Global patterns of 16S rRNA diversity at a  
4 depth of millions of sequences per sample. *Proc Natl Acad Sci* 2011;**108**:4516 LP – 4522.  
5 doi:10.1073/pnas.1000080107  
6  
7  
8  
9 52 Sheedy JR, Ebeling PR, Gooley PR, *et al.* A sample preparation protocol for 1H nuclear  
10 magnetic resonance studies of water-soluble metabolites in blood and urine. *Anal Biochem*  
11 2010;**398**:263.doi.10.1016/j.ab.2009.11.027  
12  
13  
14  
15 53 Gratton J, Phetcharaburanin J, Mullish BH, *et al.* Optimized Sample Handling Strategy for  
16 Metabolic Profiling of Human Feces. *Anal Chem*  
17 2016;**88**:4661.doi.org/10.1021/acs.analchem.5b04159  
18  
19  
20  
21 54 Beckonert O, Keun HC, Ebbels TM, *et al.* Metabolic profiling, metabolomic and  
22 metabonomic procedures for NMR spectroscopy of urine, plasma, serum and tissue  
23 extracts. *Nat Protoc* 2007;**2**:2692.https://doi.org/10.1038/nprot.2007.376  
24  
25  
26  
27 55 Byrne ML, Horne S, O'Brien-Simpson NM, *et al.* Associations between observed  
28 parenting behavior and adolescent inflammation two and a half years later in a community  
29 sample. *Heal. Psychol.* 2017;**36**:641–51. doi:10.1037/hea0000502  
30  
31  
32  
33 56 Bolyen E, Rideout JR, Dillon MR, *et al.* Reproducible, interactive, scalable and extensible  
34 microbiome data science using QIIME 2. *Nat Biotechnol* 2019;**37**:852–7.  
35 doi:10.1038/s41587-019-0209-9  
36  
37  
38  
39 57 Callahan BJ, McMurdie PJ, Rosen MJ, *et al.* DADA2: High-resolution sample inference  
40 from Illumina amplicon data. *Nat Methods* 2016;**13**:581–3. doi:10.1038/nmeth.3869  
41  
42  
43 58 Katoh K, Misawa K, Kuma K, *et al.* MAFFT: a novel method for rapid multiple sequence  
44 alignment based on fast Fourier transform. *Nucleic Acids Res* 2002;**30**.  
45 doi:10.1093/nar/gkf436  
46  
47  
48  
49 59 Price MN, Dehal PS, Arkin AP. FastTree 2—approximately maximum-likelihood trees for  
50 large alignments. *PLoS One* 2010;**5**. doi:10.1371/journal.pone.0009490  
51  
52  
53 60 Simpson CA, Mu A, Haslam N, *et al.* Feeling down? A systematic review of the gut  
54 microbiota in anxiety/depression and irritable bowel syndrome. *J Affect Disord*  
55 2020;**266**:429–46. doi:10.1016/j.jad.2020.01.124  
56  
57  
58  
59  
60

- 1  
2  
3 61 Lin H, Peddada S Das. Analysis of compositions of microbiomes with bias correction. *Nat*  
4 *Commun* 2020;**11**:3514. doi:10.1038/s41467-020-17041-7  
5  
6  
7 62 Mallick H, McIver LJ, Rahnavard A, *et al.* Multivariable Association in Population-scale  
8 Meta-omics Studies. 2020.<http://huttenhower.sph.harvard.edu/maaslin2>  
9  
10  
11 63 Oksanen J, Blanchet FG, Kindt R, *et al.* *Vegan: community ecology package*. 2012.  
12 <https://cran.r-project.org/web/packages/vegan/index.html>  
13  
14  
15 64 McMurdie PJ, Holmes S. Phyloseq: An R Package for Reproducible Interactive Analysis  
16 and Graphics of Microbiome Census Data. *PLoS One* 2013;**8**.  
17 doi:10.1371/journal.pone.0061217  
18  
19  
20  
21 65 Wickham H. *ggplot2: Elegant Graphics for Data Analysis*. New York: Springer-Verlag  
22 2016. <https://ggplot2.tidyverse.org>  
23  
24  
25 66 Rohart F, Gautier B, Singh A, *et al.* mixOmics: an R package for ‘omics feature selection  
26 and multiple data integration. *bioRxiv* 2017;108597. doi:10.1101/108597  
27  
28  
29  
30  
31  
32  
33  
34  
35  
36  
37  
38  
39  
40  
41  
42  
43  
44  
45  
46  
47  
48  
49  
50  
51  
52  
53  
54  
55  
56  
57  
58  
59  
60

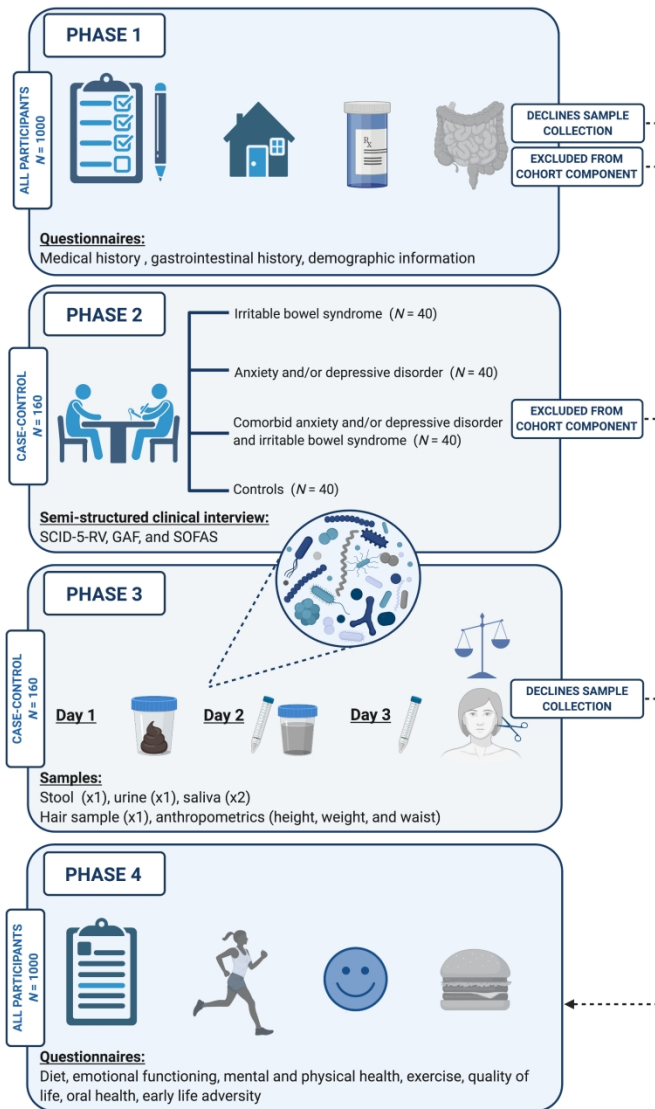

Figure 1. Phases of participation in the Bugs and Brains study. Participants eligible for the primary case-control sample collection at Phases 1 and 2 complete all phases of the study within a month, including biological sample collection (N = 160; n = 40 with IBS, n = 40 with anxiety and/or depressive disorder, n = 40 with IBS and anxiety and/or depressive disorder, n = 40 with no lifetime history of either IBS or an anxiety/depressive disorder). Participants who decline sample collection or are not eligible for the primary component complete the questionnaire-only ancillary component (Phases 1 and 4; N = 1000). GAF = Global Assessment of Functioning; IBS = irritable bowel syndrome; SOFAS = Social and Occupational Functioning Assessment Scale; Structured Clinical Interview for the Diagnostic and Statistical Manual (DSM) 5th edition (Research version [SCID-5-RV]). Created with BioRender.com.

**Table S1.** Disorders assessed by the modified SCID-5-RV utilised by the Bugs and Brains study

| Disorder                                             | Duration assessed at interview        | Eligibility Status                                                                                          |
|------------------------------------------------------|---------------------------------------|-------------------------------------------------------------------------------------------------------------|
| <u>Bipolar and related disorders</u>                 |                                       |                                                                                                             |
| Bipolar I Disorder                                   | Lifetime and past month (current)     | } X Exclusion (all groups)                                                                                  |
| Bipolar II Disorder                                  | Lifetime and past month (current)     |                                                                                                             |
| Cyclothymic Disorder                                 | Past 2 years (current)                |                                                                                                             |
| Other Specified Bipolar Disorder                     | Lifetime and past month (current)     |                                                                                                             |
| Bipolar Disorder Due to Another Medical Condition    | Lifetime and past month (current)     |                                                                                                             |
| Substance/Medication-Induced Bipolar Disorder        | Lifetime and past month (current)     |                                                                                                             |
| <u>Depressive disorders</u>                          |                                       |                                                                                                             |
| Major Depressive Disorder                            | Lifetime and past month (current)     | } ✓ Current = Inclusion (MH and Comorbid)<br>- Lifetime = Neither inclusion nor exclusion (MH and Comorbid) |
| Persistent Depressive Disorder                       | Lifetime and past two years (current) |                                                                                                             |
|                                                      |                                       | } X Lifetime = Exclusion (Controls and IBS)                                                                 |
| Premenstrual Dysphoric Disorder                      | Past 12 months (current)              | } - Lifetime = Neither inclusion nor exclusion                                                              |
| Other Specified Depressive Disorder                  | Lifetime and past month (current)     | } - Lifetime = Neither inclusion nor exclusion (MH and Comorbid)                                            |
| Depressive Disorder Due to Another Medical Condition | Lifetime and past month (current)     |                                                                                                             |
| Substance/Medication-Induced Depressive Disorder     | Lifetime and past month (current)     | } X Lifetime = Exclusion (Controls and IBS)                                                                 |
| <u>Schizophrenia and other psychotic disorders</u>   |                                       |                                                                                                             |
| Clinical psychotic symptoms                          | Lifetime and current                  | } X Exclusion (all groups)                                                                                  |
| <u>Substance use disorders</u>                       |                                       |                                                                                                             |
| Alcohol                                              | Past 12 months (current)              | } X Exclusion (all groups)                                                                                  |

| Disorder                                                                   | Duration assessed at interview         | Eligibility Status                                               |
|----------------------------------------------------------------------------|----------------------------------------|------------------------------------------------------------------|
| Sedative-Hypnotic-Anxiolytic                                               | Past 12 months (current)               | }                                                                |
| Cannabis                                                                   | Past 12 months (current)               |                                                                  |
| Stimulants/Cocaine                                                         | Past 12 months (current)               |                                                                  |
| Opioids                                                                    | Past 12 months (current)               |                                                                  |
| Phencyclidine (PCP)                                                        | Past 12 months (current)               |                                                                  |
| Other Hallucinogens                                                        | Past 12 months (current)               |                                                                  |
| Inhalants                                                                  | Past 12 months (current)               |                                                                  |
| Other/Unknown                                                              | Past 12 months (current)               |                                                                  |
| <u>Anxiety disorders</u>                                                   |                                        |                                                                  |
| Panic Disorder                                                             | Lifetime and past month (current)      | } ✓ Current = Inclusion (MH and Comorbid)                        |
| Agoraphobia                                                                | Lifetime and past six months (current) |                                                                  |
| Social Anxiety Disorder                                                    | Lifetime and past six months (current) |                                                                  |
| Generalized Anxiety Disorder                                               | Lifetime and past six months (current) |                                                                  |
| <hr/>                                                                      |                                        |                                                                  |
| Specific Phobia                                                            | Lifetime and past six months (current) | } - Lifetime = Neither inclusion nor exclusion (MH and Comorbid) |
| Other Specified Anxiety Disorder                                           | Lifetime and past month (current)      |                                                                  |
| Anxiety Disorder Due to Another Medical Condition                          | Lifetime and past month (current)      |                                                                  |
| Substance/Medication-Induced Anxiety Disorder                              | Lifetime and past month (current)      |                                                                  |
| <hr/>                                                                      |                                        |                                                                  |
| <u>Obsessive-compulsive and related disorders</u>                          |                                        |                                                                  |
| Obsessive Compulsive Disorder                                              | Lifetime and past month (current)      | } - Lifetime = Neither inclusion nor exclusion (MH and Comorbid) |
| Other Specified Obsessive Compulsive and Related Disorder                  | Lifetime and past month (current)      |                                                                  |
| Obsessive-Compulsive and Related Disorder Due to Another Medical Condition | Lifetime and past month (current)      |                                                                  |
| Substance/Medication-Induced Obsessive-Compulsive and Related Disorder     | Lifetime and past month (current)      |                                                                  |
| <hr/>                                                                      |                                        |                                                                  |
|                                                                            |                                        | } ✗ Lifetime = Exclusion (Controls and IBS)                      |

| Disorder                                       | Duration assessed at interview             | Eligibility Status                                                                          |
|------------------------------------------------|--------------------------------------------|---------------------------------------------------------------------------------------------|
| <u>Sleep-wake disorders</u>                    |                                            |                                                                                             |
| Insomnia Disorder                              | Past three months (current)                | } - Lifetime = Neither inclusion nor exclusion (MH and Comorbid)                            |
| Hypersomnolence Disorder                       | Past three months (current)                |                                                                                             |
| Substance-Induced Sleep Disorder               | Past three months (current)                |                                                                                             |
| <u>Feeding and Eating Disorders</u>            |                                            |                                                                                             |
| Anorexia Nervosa                               | Past 12 months and past 3 months (current) | } X Exclusion (all groups)                                                                  |
| Bulimia Nervosa                                | Past 12 months and past 3 months (current) |                                                                                             |
| Binge Eating Disorder                          | Past 12 months and past 3 months (current) |                                                                                             |
| Other Specified Feeding or Eating Disorder     | Past 12 months and past 3 months (current) |                                                                                             |
| <u>Somatic Symptom and Related Disorders</u>   |                                            |                                                                                             |
| Somatic Symptom Disorder                       | Past 6 months (current)                    | } X Exclusion (all groups)<br>IBS-related symptoms not included for IBS and comorbid groups |
| Illness Anxiety Disorder                       | Past 6 months (current)                    |                                                                                             |
| <u>Externalizing Disorders</u>                 |                                            |                                                                                             |
| Adult Attention-deficit Hyperactivity Disorder | Past 6 months (current)                    | } - Lifetime = Neither inclusion nor exclusion (MH and Comorbid)                            |
|                                                |                                            | X Lifetime = Exclusion (Controls and IBS)                                                   |
| <u>Trauma- and Stressor-Related Disorders</u>  |                                            |                                                                                             |
| Acute Stress Disorder                          | Past month (current)                       | } - Lifetime = Neither inclusion nor exclusion (MH and Comorbid)                            |
| Posttraumatic Stress Disorder                  | Lifetime and past month (current)          |                                                                                             |
| Adjustment Disorder                            | Past 6 months (current)                    |                                                                                             |

1  
2  
3  
4  
5  
6  
7  
8  
9  
10  
11  
12  
13  
14  
15  
16  
17  
18  
19  
20  
21  
22  
23  
24  
25  
26  
27  
28  
29  
30  
31  
32  
33  
34  
35  
36  
37  
38  
39  
40  
41  
42  
43  
44  
45  
46

---

| Disorder                                              | Duration assessed at interview    | Eligibility Status                        |
|-------------------------------------------------------|-----------------------------------|-------------------------------------------|
| Other Specified Trauma- and Stressor-Related Disorder | Lifetime and past month (current) | ✗ Lifetime = Exclusion (Controls and IBS) |

---

*Notes.* MH = mental health anxiety/depression group; Comorbid = comorbid IBS and anxiety/depression group; IBS = irritable bowel syndrome

For peer review only



## Description of the Modified Psychiatric Diagnostic Screening Questionnaire

The Psychiatric Diagnostic Screening Questionnaire (PDSQ) will be modified for the Bugs and Brains Study to screen for the likely presence/absence of mental health diagnoses that relate to the inclusion and exclusion criteria of this study, particularly Major Depressive Disorder, anxiety disorders, substance use disorders, psychotic symptoms, and somatic disorders

The PDSQ has been modified as follows:

- 6 items relating to suicidal ideation and behavior have been removed. Suicidal ideation and behavior will be assessed by a research assistant during the SCID-5-RV diagnostic interview in Phase 2, and in Phase 4 self-report questionnaires.
- Questions relating to Post-Traumatic Stress symptoms and Obsessive Compulsive behaviours will be excluded as information pertaining to these disorders is not required for inclusions/exclusion criteria.
- Additional questions relating to mania symptoms have been added to assess for likely diagnosis of Bipolar disorders.
- Two additional questions assessing Persistent Depressive Disorder were added.
- An additional question assessing Anorexia Nervosa was added.
- For each diagnostic category, a question assessing lifetime history of experience of several symptoms from that diagnostic category has been added.

# BMJ Open

**Protocol: Bugs and Brains, the Gut and Mental Health Study  
- A mixed-methods study investigating microbiota  
composition and function in anxiety, depression and  
irritable bowel syndrome**

|                               |                                                                                                                                                                                                                                                                                                                                                                                                                                                                                                                                                                                                                                                                                                                                                                                                                                                                                                                                                                                                                                                                                                                                                                                                                                                                                                                                                                                                                                                                                                                                                                                                                                                                                                                                                                                                                                                                                                                                                                                                                                                                                                                                                                                                                                                                                                                           |
|-------------------------------|---------------------------------------------------------------------------------------------------------------------------------------------------------------------------------------------------------------------------------------------------------------------------------------------------------------------------------------------------------------------------------------------------------------------------------------------------------------------------------------------------------------------------------------------------------------------------------------------------------------------------------------------------------------------------------------------------------------------------------------------------------------------------------------------------------------------------------------------------------------------------------------------------------------------------------------------------------------------------------------------------------------------------------------------------------------------------------------------------------------------------------------------------------------------------------------------------------------------------------------------------------------------------------------------------------------------------------------------------------------------------------------------------------------------------------------------------------------------------------------------------------------------------------------------------------------------------------------------------------------------------------------------------------------------------------------------------------------------------------------------------------------------------------------------------------------------------------------------------------------------------------------------------------------------------------------------------------------------------------------------------------------------------------------------------------------------------------------------------------------------------------------------------------------------------------------------------------------------------------------------------------------------------------------------------------------------------|
| Journal:                      | <i>BMJ Open</i>                                                                                                                                                                                                                                                                                                                                                                                                                                                                                                                                                                                                                                                                                                                                                                                                                                                                                                                                                                                                                                                                                                                                                                                                                                                                                                                                                                                                                                                                                                                                                                                                                                                                                                                                                                                                                                                                                                                                                                                                                                                                                                                                                                                                                                                                                                           |
| Manuscript ID                 | bmjopen-2020-043221.R2                                                                                                                                                                                                                                                                                                                                                                                                                                                                                                                                                                                                                                                                                                                                                                                                                                                                                                                                                                                                                                                                                                                                                                                                                                                                                                                                                                                                                                                                                                                                                                                                                                                                                                                                                                                                                                                                                                                                                                                                                                                                                                                                                                                                                                                                                                    |
| Article Type:                 | Protocol                                                                                                                                                                                                                                                                                                                                                                                                                                                                                                                                                                                                                                                                                                                                                                                                                                                                                                                                                                                                                                                                                                                                                                                                                                                                                                                                                                                                                                                                                                                                                                                                                                                                                                                                                                                                                                                                                                                                                                                                                                                                                                                                                                                                                                                                                                                  |
| Date Submitted by the Author: | 23-Feb-2021                                                                                                                                                                                                                                                                                                                                                                                                                                                                                                                                                                                                                                                                                                                                                                                                                                                                                                                                                                                                                                                                                                                                                                                                                                                                                                                                                                                                                                                                                                                                                                                                                                                                                                                                                                                                                                                                                                                                                                                                                                                                                                                                                                                                                                                                                                               |
| Complete List of Authors:     | <p>Simpson, Carra; The University of Melbourne Faculty of Medicine Dentistry and Health Sciences, Melbourne School of Psychological Sciences</p> <p>Schwartz, Orli; Orygen The National Centre of Excellence in Youth Mental Health, Centre for Youth Mental Health</p> <p>Eliby, Djamila; The University of Melbourne Faculty of Medicine Dentistry and Health Sciences, Melbourne School of Psychological Sciences; The University of Melbourne Faculty of Medicine Dentistry and Health Sciences, Melbourne Neuropsychiatry Centre</p> <p>Butler, Catherine; The University of Melbourne Faculty of Medicine Dentistry and Health Sciences, Centre for Oral Health Research, Melbourne Dental School, Bio21 Institute</p> <p>Huang, Katherine; The University of Melbourne Bio21 Molecular Science and Biotechnology Institute, Department of Biochemistry and Molecular Biology</p> <p>Simpson-O'Brien, Neil; The University of Melbourne Faculty of Medicine Dentistry and Health Sciences, Centre for Oral Health Research, Melbourne Dental School, Bio21 Institute</p> <p>Callaghan, Bridget; University of California Los Angeles, The Department of Psychology; The University of Melbourne Faculty of Medicine Dentistry and Health Sciences, Melbourne Neuropsychiatry Centre</p> <p>Dashper, Stuart; The University of Melbourne Faculty of Medicine Dentistry and Health Sciences, Centre for Oral Health Research, Melbourne Dental School, Bio21 Institute</p> <p>Gooley, Paul; The University of Melbourne Bio21 Molecular Science and Biotechnology Institute, Department of Biochemistry and Molecular Biology</p> <p>Whittle, Sarah; The University of Melbourne Faculty of Medicine Dentistry and Health Sciences, Melbourne Neuropsychiatry Centre; The University of Melbourne Faculty of Medicine Dentistry and Health Sciences, Melbourne School of Psychological Sciences</p> <p>Haslam, Nick; The University of Melbourne Faculty of Medicine Dentistry and Health Sciences, Melbourne School of Psychological Sciences</p> <p>Simmons, Julian; The University of Melbourne Faculty of Medicine Dentistry and Health Sciences, Melbourne School of Psychological Sciences; The University of Melbourne Faculty of Medicine Dentistry and Health Sciences, Melbourne Neuropsychiatry Centre</p> |

1  
2  
3  
4  
5  
6  
7  
8  
9  
10  
11  
12  
13  
14  
15  
16  
17  
18  
19  
20  
21  
22  
23  
24  
25  
26  
27  
28  
29  
30  
31  
32  
33  
34  
35  
36  
37  
38  
39  
40  
41  
42  
43  
44  
45  
46  
47  
48  
49  
50  
51  
52  
53  
54  
55  
56  
57  
58  
59  
60

|                                                    |                                                                                                                                                   |
|----------------------------------------------------|---------------------------------------------------------------------------------------------------------------------------------------------------|
| <b>&lt;b&gt;Primary Subject Heading&lt;/b&gt;:</b> | Mental health                                                                                                                                     |
| Secondary Subject Heading:                         | Dentistry and oral medicine, Gastroenterology and hepatology, Genetics and genomics, Immunology (including allergy), Nutrition and metabolism     |
| Keywords:                                          | MICROBIOLOGY, Anxiety disorders < PSYCHIATRY, Depression & mood disorders < PSYCHIATRY, Functional bowel disorders < GASTROENTEROLOGY, PSYCHIATRY |
|                                                    |                                                                                                                                                   |

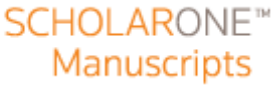



I, the Submitting Author has the right to grant and does grant on behalf of all authors of the Work (as defined in the below author licence), an exclusive licence and/or a non-exclusive licence for contributions from authors who are: i) UK Crown employees; ii) where BMJ has agreed a CC-BY licence shall apply, and/or iii) in accordance with the terms applicable for US Federal Government officers or employees acting as part of their official duties; on a worldwide, perpetual, irrevocable, royalty-free basis to BMJ Publishing Group Ltd ("BMJ") its licensees and where the relevant Journal is co-owned by BMJ to the co-owners of the Journal, to publish the Work in this journal and any other BMJ products and to exploit all rights, as set out in our [licence](#).

The Submitting Author accepts and understands that any supply made under these terms is made by BMJ to the Submitting Author unless you are acting as an employee on behalf of your employer or a postgraduate student of an affiliated institution which is paying any applicable article publishing charge ("APC") for Open Access articles. Where the Submitting Author wishes to make the Work available on an Open Access basis (and intends to pay the relevant APC), the terms of reuse of such Open Access shall be governed by a Creative Commons licence – details of these licences and which [Creative Commons](#) licence will apply to this Work are set out in our licence referred to above.

Other than as permitted in any relevant BMJ Author's Self Archiving Policies, I confirm this Work has not been accepted for publication elsewhere, is not being considered for publication elsewhere and does not duplicate material already published. I confirm all authors consent to publication of this Work and authorise the granting of this licence.

1  
2  
3 **Protocol: Bugs and Brains, the Gut and Mental Health Study - A mixed-methods study**  
4 **investigating microbiota composition and function in anxiety, depression and irritable**  
5 **bowel syndrome**  
6  
7

8  
9  
10 Carra A. Simpson<sup>1,2</sup>, Orli S. Schwartz<sup>3</sup>, Djamila Eliby<sup>1,2</sup>, Catherine A. Butler<sup>4</sup>, Katherine  
11 Huang<sup>5</sup>, Neil O'Brien-Simpson<sup>4</sup>, Bridget L. Callaghan<sup>2,6</sup>, Stuart G. Dashper<sup>4</sup>, Paul R. Gooley<sup>5</sup>,  
12 Sarah Whittle<sup>1,2</sup>, Nick Haslam<sup>1</sup>, & Julian G. Simmons<sup>1,2</sup>  
13  
14

15  
16  
17  
18 <sup>1</sup> Melbourne School of Psychological Sciences, Faculty of Medicine, Dentistry and Health  
19 Sciences, The University of Melbourne, VIC, 3010, Australia.  
20

21  
22 <sup>2</sup> Melbourne Neuropsychiatry Centre, Department of Medicine, Faculty of Medicine, Dentistry  
23 and Health Sciences, The University of Melbourne and Melbourne Health, VIC, 3010, Australia.  
24

25  
26  
27 <sup>3</sup> Orygen, The National Centre of Excellence in Youth Mental Health; Centre for Youth Mental  
28 Health, The University of Melbourne, VIC, 3010, Australia.  
29

30  
31 <sup>4</sup> Centre for Oral Health Research, Melbourne Dental School, Bio21 Institute, The University of  
32 Melbourne, VIC, 3010, Australia  
33

34  
35  
36 <sup>5</sup> Department of Biochemistry and Molecular Biology, Bio21 Molecular Science and  
37 Biotechnology Institute, University of Melbourne, VIC, 3010, Australia  
38

39  
40 <sup>6</sup> The Department of Psychology, The University of California, Los Angeles, 90503  
41

42  
43 **Correspondence:** Carra A. Simpson, <https://orcid.org/0000-0002-8281-5881>  
44

45 Melbourne School of Psychological Sciences, 12th floor Redmond Barry Building, The  
46 University of Melbourne, Parkville, VIC 3010, Australia.  
47

48  
49 Email: [carra.simpson@unimelb.edu.au](mailto:carra.simpson@unimelb.edu.au), Phone: +61 03 8344 1845  
50

51  
52 **Declarations of interest:** None  
53  
54  
55  
56  
57  
58  
59  
60

## Abstract

**Introduction:** Research has highlighted relationships between the microorganisms that inhabit our gastrointestinal tract (oral and gut microbiota) with host mood and gastrointestinal functioning. Mental health disorders and functional gastrointestinal disorders co-occur at high rates, although the mechanisms underlying these associations remain unclear. The Bugs and Brains study aims to investigate complex relationships between anxiety/depression and irritable bowel syndrome (IBS) in two ways. Firstly, its primary component will compare the gut and oral microbiota in females with anxiety/depression and/or IBS relative to controls, and investigate underlying physiological, endocrine, and immune factors, as well as associations with diet and psychosocial factors. In an ancillary component, the study will also investigate gastrointestinal and mental health symptoms in a larger sample, and explore relationships with diet, exercise, oral health, substance use, medical history, early life adversity, and psychosocial factors.

**Methods and analysis:** The Bugs and Brains study aims to recruit 160 females to the primary component: i) 40 controls; ii) 40 participants with a depressive/anxiety disorder, but no IBS; iii) 40 participants with IBS, but no depressive/anxiety disorder; and iv) 40 participants with both depressive/anxiety disorder and IBS. Participation is completed within one month, and involves comprehensive questionnaires, anthropometrics, a diagnostic clinical interview, collection of two saliva samples, and stool, urine, and hair samples. This study aims to use a systems biology approach to characterise oral and gut microbial composition and function using 16S rRNA gene sequencing and nuclear magnetic resonance spectroscopy. As part of the ancillary component, it will collect questionnaire data from 1000 females aged 18-40 years, capturing mental health, gastrointestinal health, oral health, diet, and psychosocial factors. **Ethics and dissemination:** Approval was granted by the University of Melbourne Human Research Ethics Committee (#1749221). All participants voluntarily provided informed consent. Results will be published in peer-reviewed journals and presented at scientific conferences.

*Keywords:* Gut microbiota, microbiome, depression, anxiety, irritable bowel syndrome

## Article summary

### *Strengths and limitations*

- The Bugs and Brains Study will compare oral and gut microbiota composition and function using next generation sequencing and nuclear magnetic resonance spectroscopy in individuals with anxiety/depression, IBS, both anxiety/depression and IBS, and controls, as defined by clinical diagnosis and strict inclusion criteria.
- It will assess diet, medical history, gastrointestinal health, early life adversity, mental and physical health symptoms using detailed questionnaires and clinical interview, and investigate associations between symptoms, microbiota, metabolome, and the immune and endocrine systems.
- It will also investigate gastrointestinal and mental health symptoms in a large sample, and examine relationships with diet, exercise, oral health, substance use, medical history, early life adversity, and psychosocial factors.
- Due to the possible effects of host sex, age and substance use on microbial outcomes, this study chose to recruit females aged 18 to 40 who were non-smokers, medication free, and without a substance abuse disorder; the generalisability of this study is therefore limited to this specific population.
- This study is cross-sectional in nature and employs 16S rRNA gene sequencing; future research should investigate these associations using deeper resolution sequencing (i.e., shotgun metagenomics), examine relationships longitudinally to disentangle causes and effects, and extend investigations to male participants.

## Introduction

Microorganisms have co-existed alongside humans throughout our evolution, with between 20 and 30 trillion microbial cells occupying ecological niches within and upon the human body. It is therefore unsurprising that bacteria residing throughout the gastrointestinal (GI) tract are implicated in host endocrine, immune, and nervous system functioning [1]. Microbes produce neuroactive compounds, including catecholamines (e.g., noradrenaline, dopamine), GABA, histamine, serotonin, and acetylcholine, each of which plays a critical role in human physiological functioning [1,2]. Multiple GI bacteria and their metabolic products also facilitate peristaltic waves to aid with digestion [3], contribute to fermentation of dietary carbohydrates, maintain host membrane function, and produce essential amino acids and vitamins [2,4]. Resident bacterial species also prime the immune system in the early stages of life, teaching our bodies what is ‘foreign’ rather than commensal [2]. The gut microbiota (i.e., the collection of microorganisms in the GI tract) is therefore essential to normal development.

As we come to appreciate the essential role microorganisms play in host physiology, so too have we opened a novel direction for investigation in conditions with no current clear aetiology. Among these are irritable bowel syndrome (IBS), depression and anxiety disorders. IBS is the most common functional gastrointestinal disorder, affecting between 7 to 21% of individuals worldwide [5]. Similarly, depression remains the highest contributor to non-fatal health burden, and approximately 264 million individuals live with an anxiety disorder globally [6]. These three conditions frequently co-occur [7]: approximately 84% of patients with IBS also have a depressive disorder and 44% an anxiety disorder [8,9]. Moreover, 45% of patients with anxiety and 30% of patients with a depressive disorder develop IBS [7,10,11]. The mechanisms underlying this comorbidity remain unclear.

The complex interplay between host physiology and microbiota promises novel insight into these conditions. Research has revealed that anxiety, depression and IBS share several gut microbial alterations, including decreased overall microbial diversity and a higher relative abundance of pro-inflammatory and toxigenic species [12–15]. Moreover, research indicates alterations may exist along a continuum, in that participants with comorbid depression and IBS have gut microbiota alterations simply more pronounced than those presenting with one disorder, including higher Proteobacteria, *Prevotella/Prevotellaceae*, *Bacteroides* and lower *Lachnospiraceae* [10,16–18]. These implicated taxa further build on the evidence of altered



1  
2  
3 microbial and host immune system interactions, as the taxa reported to have a higher relative  
4 abundance in anxiety, depression and IBS are associated with inflammation, whereas a loss of  
5 species that secrete anti-inflammatory metabolic products has also been observed [14]. No  
6 studies have compared the gut microbiota of participants with anxiety relative to IBS, although  
7 studies have identified correlations between bacterial taxa and anxiety symptoms among IBS  
8 patients [18–20].

9  
10  
11  
12  
13  
14 Although research in this area has primarily investigated the composition of the gut  
15 microbiota, the entire length of the GI tract harbours resident microorganisms. At its entryway,  
16 the microbiota of the oral cavity is the second most diverse community in the human body [21],  
17 and research indicates that microbial representation in the mouth is predictive of composition in  
18 the lower GI tract [22]. Oral bacteria can also translocate throughout the body, with significant  
19 effects on GI and systemic health [23]. No known studies have examined the oral microbiota in  
20 clinical anxiety, depression or IBS; however, our existing research observed associations  
21 between oral microbiota composition with anxiety and depression symptoms [24].

22  
23  
24  
25  
26  
27  
28  
29  
30  
31  
32  
33  
34  
35  
36  
37  
38  
39  
40  
41  
42  
43  
44  
45  
46  
47  
48  
49  
50  
51  
52  
53  
54  
55  
56  
57  
58  
59  
60  
Characterisation of the oral microbiota in clinical mental health and IBS cohorts therefore  
warrants investigation.

Several confounding factors have been neglected in the small literature investigating the  
microbiota in IBS, anxiety, and depression. Due to their effects on microbial composition, it  
seems reasonable to consider psychotropic medication use [25, 26], smoking [27], alcohol  
consumption [27], IBS subtype and severity [15,18], as well as biological sex [28]. Diet, and its  
interaction with psychosocial factors, is another source of gut microbiota variation that has been  
insufficiently considered in existing research [29,30]. Finally, the extant literature has not often  
utilised gold-standard diagnostic measures to examine mental health (i.e., clinical interviews),  
and studies have examined microbiota composition but neglected microbial function [31].

### **Aims and objectives**

Bugs and Brains, the Gut and Mental Health Study (The Bugs and Brains Study) aims to  
characterise the microbial and physiological profiles in anxiety, depression, and IBS; to examine  
associations between symptoms and confounding variables; and, to investigate varied  
contributors to disorder presentation (both across and within disorders). In this primary case-  
control component, key questions relate to the similarities and differences across bacterial,  
metabolic, endocrine, and immune indices, in a well-controlled cohort. Given the associations

1  
2  
3 between biological sex and the microbiota, this study chose to recruit females only and exclude  
4 current smokers or participants with a substance abuse disorder. Possible sources of inter-study  
5 variation in previous investigations will be considered (i.e., symptom severity, medication use,  
6 diet). In a large ancillary questionnaire-only component, this research will also investigate how  
7 GI and mental health symptoms are associated with diet, exercise, oral health, substance use,  
8 medical history, early life adversity, and psychosocial factors. Understanding shared and distinct  
9 microbiota relationships in IBS, anxiety and depression, particularly within a well-characterised  
10 sample, has implications in resolving the directionality of co-morbidity, and in informing future  
11 targeted clinical interventions.  
12  
13  
14  
15  
16  
17  
18

## 19 **Methods and analysis**

### 20 **Participants**

#### 21 ***Primary case-control component***

22 Females aged 18 to 40 will be assessed for participation in all phases of the Bugs and  
23 Brains Study. Recruitment for the study began in October 2017 and all phases are expected to be  
24 completed by December 2021. The primary case-control component will include 160  
25 community-based female volunteers aged 18 to 40 who meet eligibility criteria for one of four  
26 groups:  
27  
28  
29  
30  
31

- 32 i) 40 controls
  - 33 ii) 40 participants with a depressive/anxiety disorder, but no IBS
  - 34 iii) 40 participants with IBS, but no depressive/anxiety disorder; and
  - 35 iv) 40 participants with depressive/anxiety disorder and IBS
- 36  
37  
38  
39  
40

41 The study chose to recruit only participants of the female sex due to significantly elevated rates  
42 of all three conditions relative to biological males [6,32]. All participants are being recruited  
43 through online and printed advertisements at the University of Melbourne and using paid  
44 Facebook ads. All participants provide informed consent and demonstrate adequate  
45 comprehension of English. Participants who complete biological samples are monetarily  
46 reimbursed for their time, and participants who complete the ancillary questionnaire-only  
47 component are reimbursed with a personalised dietary analysis.  
48  
49  
50  
51  
52

#### 53 ***Ancillary questionnaire-only component***

54 To investigate associations in a larger sample, the ancillary component aims to collect  
55  
56  
57  
58  
59  
60

questionnaire data from 1000 females aged 18 to 40, capturing mental health, diet, exercise, gastrointestinal health, oral health, substance use, medical history, emotion regulation, stress, early life adversity, and medical history.

### **Inclusion criteria for the case-control component**

Participants in the primary component are required to live in Greater Melbourne or Geelong (unless willing to travel to the site of sample collection: Melbourne, Australia). Inclusion and exclusion criteria are presented in Table 1. All participants initially complete the Phase 1 screening questionnaire to assess their likely eligibility for one of the four groups. If participants meet screening criteria, they are invited to take part in a psychiatric diagnostic interview to confirm eligibility (Phase 2). All ineligible participants, including those who prefer not to complete sample collection, are invited to complete the ancillary questionnaire-only component.

#### ***Depression and anxiety group***

Participants in this group must meet current diagnostic criteria for at least one of six depressive and/or anxiety disorders at Phase 2, as assessed by the Structured Clinical Interview for DSM-5 Research Version (SCID-5-RV; [33]). Specific disorders for inclusion are: Major Depressive Disorder, Persistent Depressive Disorder, Social Anxiety Disorder, Panic Disorder, Agoraphobia, and Generalized Anxiety Disorder. Participants with a comorbid Specific Phobia, Obsessive-Compulsive or Related Disorder, Trauma- or Stressor-Related Disorder, Sleep Disorder, and/or Externalizing Disorder, as assessed in the SCID-5-RV, are included if they also meet criteria for one of the six target disorders. Given the possibility that participants may experience a Major Depressive Episode of relatively brief duration, participants with Major Depressive Disorder will also be included if a clinical episode is in partial remission (i.e., although full diagnostic criteria are not met, symptoms of the immediately preceding episode are present and have not fully resolved at the time of assessment). Participants in this group must have no lifetime history of IBS and must not meet current diagnostic criteria for IBS or another functional gastrointestinal disorder.

#### ***Irritable bowel syndrome group***

Participants must meet current criteria for IBS, as assessed by the Rome IV during Phase 1 screening questionnaires [34,35]. The Rome IV assesses gastrointestinal symptom duration and

1  
2  
3 delineates diagnosis by the prominent altered stool type: constipation (IBS-C), diarrhoea (IBS-  
4 D), mixed (IBS-M), or an unspecified dominance (IBS-U). Participants in this group must not  
5 meet lifetime diagnostic criteria for any of the DSM-5 disorders mentioned above (including  
6 Specific Phobia, etc).

### 10 ***Comorbid irritable bowel syndrome and anxiety/depression group***

11  
12 Consistent with measures outlined above, participants must currently meet criteria for  
13 IBS and diagnosis of at least one of the six primary anxiety and/or depressive disorders.

### 15 ***Control group***

16  
17 Participants in this group must have no lifetime history of IBS, must not meet current  
18 diagnostic criteria for IBS or another functional gastrointestinal disorder, and must not meet  
19 lifetime diagnostic criteria for any of the DSM-5 disorders mentioned above (i.e., current or  
20 past).

### 24 **Exclusion criteria for the primary case-control component (all groups)**

#### 26 ***Physical health***

27  
28 Participants are excluded from all groups if they report or present with current obesity,  
29 hypertension, cardiovascular disease, respiratory disease, diabetes mellitus, liver cirrhosis, fatty  
30 liver disease, inflammatory bowel disease, coeliac disease, other autoimmune disease, short  
31 bowel syndrome, or a history of abdominal surgery that involved cutting into the GI tract.  
32  
33 Participants who report daily cigarette smoking, a recent colonoscopy (past 12 months), or who  
34 are pregnant/lactating are also excluded.

#### 38 ***Mental health***

39  
40 Participants are excluded if they have a lifetime history of clinical psychotic symptoms or  
41 disorder, Bipolar Disorder, Somatic Symptom or Related Disorder, or over the past 12 months  
42 meet criteria for either a Feeding and Eating Disorder or an Alcohol or Substance Use Disorder  
43 (at Phase 1 questionnaires or Phase 2 SCID-5 interview).

#### 47 ***Medication***

48  
49 Participants are excluded if they report use of anti-depressants, anxiolytics, other  
50 psychotropics, steroids, probiotics, prebiotics or synbiotics in the past four weeks or throughout  
51 the duration of their participation. They are also excluded if they have a current bacterial, fungal,  
52 or viral infection, or if they have used non-steroidal anti-inflammatory drugs or antifungal  
53 medications in the past two weeks or throughout their participation. If participants report short-  
54  
55  
56  
57  
58  
59

1  
2  
3 term medication use or illness, they are invited to participate when they meet eligibility criteria.  
4 Specific diets may be used to alleviate GI symptoms (e.g., FODMAP exclusion, casein-free), and  
5 therefore participants without IBS are excluded if they are following a restrictive diet (i.e., do not  
6 meet IBS criteria, potentially due to alleviation of symptoms via diet).  
7  
8  
9

### 10 **Inclusion criteria for the ancillary questionnaire-only component**

11  
12 Participants who are ineligible for the primary case-control component, or who elect not  
13 to collect biological samples, are invited to complete the ancillary questionnaire-only  
14 component. No strict eligibility criteria apply, although all participants are required to provide  
15 informed consent and demonstrate adequate comprehension of English. All participants in the  
16 case-control component complete the same questionnaires. The phases of participation in the  
17 Bugs and Brains Study are presented in Figure 1.  
18  
19  
20  
21  
22  
23  
24  
25  
26  
27  
28  
29  
30  
31  
32  
33  
34  
35  
36  
37  
38  
39  
40  
41  
42  
43  
44  
45  
46  
47  
48  
49  
50  
51  
52  
53  
54  
55  
56  
57  
58  
59  
60

**Table 1.** Inclusion criteria for full participation in the Bugs and Brains Study (i.e., primary case-control component)

| Inclusion criteria                                                                                  | Controls | Depression/Anxiety | IBS | Depression/Anxiety and IBS |
|-----------------------------------------------------------------------------------------------------|----------|--------------------|-----|----------------------------|
| Female sex                                                                                          | ✓        | ✓                  | ✓   | ✓                          |
| Fluent in English                                                                                   | ✓        | ✓                  | ✓   | ✓                          |
| Capacity to provide consent                                                                         | ✓        | ✓                  | ✓   | ✓                          |
| Live in Melbourne or Geelong (Australia)                                                            | ✓        | ✓                  | ✓   | ✓                          |
| Meet DSM-5 criteria for current Depression or Anxiety disorder*                                     | X        | ✓                  | X   | ✓                          |
| OCD, specific phobia, Trauma- or stressor-related disorder, Sleep Disorder, Externalizing disorders | X        | -                  | X   | -                          |
| Irritable bowel syndrome (Rome IV)                                                                  | X        | X                  | ✓   | ✓                          |

Notes. ✓= inclusion criteria; X= exclusion criteria (current or lifetime history [as assessed by SCID-5-RV]); - = neither exclusion nor inclusion; \* Specific disorders for inclusion are: Major Depressive Disorder, Persistent Depressive Disorder, Social Anxiety Disorder, Panic Disorder, Agoraphobia, and Generalized Anxiety Disorder as assessed by the Structured Clinical Interview for the Diagnostic and Statistical Manual fifth edition, research version (SCID-5-RV)

[INSERT FIGURE 1 HERE]

## **Phases of participation**

### ***Phase 1 - screening questionnaire (all participants)***

Participants who provide informed consent are sent a Phase 1 questionnaire link online, using Qualtrics (Provo, UT). This component takes approximately 20 minutes and comprises a brief demographic overview, the Psychiatric Diagnostic Screening Questionnaire (PDSQ; [36]), and the Rome IV IBS module [34]. It also captures participants' regular diet category (e.g., omnivore, low FODMAP), medication/supplement use, and alcohol/substance use. Eligible participants are invited for Phase 2 screening. Excluded participants are invited to complete Phase 4 questionnaires as part of the ancillary component (bypassing Phases 2 and 3).

### ***Phase 2 - assessment of current and past mental health diagnoses (SCID-5; case-control component only)***

Participants invited for the primary case-control component are administered the SCID-5-RV [33] to further assess eligibility. Interviews are conducted in-person at the University of Melbourne or online via video application. Trained interviewers administer a modified version of the SCID-5-RV to assess the inclusion and exclusion psychiatric disorders, described in detail in Supplementary Materials. Researchers also collect a hospitalisation and mental health treatment history (e.g., psychotherapeutic and pharmacological) and assess functioning using the Global Assessment of Functioning (GAF) and Social and Occupational Functioning Assessment Scale (SOFAS) [37]. All interviewers hold a tertiary degree in psychological sciences or related fields, are trained in diagnostic psychological interviewing, and are required to complete Management of Clinical Aggression training (MOCA) [38] and Applied Suicide Intervention Skills Training (ASIST, LivingWorks). Fortnightly clinical meetings are conducted with the research clinical psychologist (OS) to maintain interviewer consistency and discuss any risks presented by participants. Interrater reliability will be conducted for at least 20% of interviews from eligible participants to assess diagnostic-level consistency.

### ***Phase 3 - sample collection and anthropometrics (case-control component only)***

In Phase 3 of the study, participants collect biological samples in their own home. Instructions are provided verbally and included in written form with the collection kits. On day one, a stool sample is collected; on day two, a urine sample and saliva sample are collected on awakening; on day three, another saliva sample is collected at awakening. Instructions on sterile storage are provided, and samples are immediately placed in participants' freezers following collection. A home visit is scheduled to pick up the biological samples, collect the hair sample, and take anthropometric measurements (height, weight and waist circumference), ideally within one week of collection. Samples are then transported on ice to the university and stored at -80 °C until processing.

**Faecal sample.** Participants collect a faecal sample at first bowel movement on day 1 of sample collection, but not if they are menstruating or sick. Participants are asked to wait at least three days after they cease menses to begin collection, and to not collect samples within one week of menstruation, due to the effect of menstrual cycling on endocrine outcomes [39]. A preliminary literature also describes an oestrogen-gut microbiota axis [40], therefore we sought to avoid peaks in oestrogen secretion that may confound microbial analyses. Prior to sample collection, participants are also asked to consume a diet 'normal for them' for at least two weeks. Approximately 2.5 g is collected into sterile faecal collection containers. Participants are instructed not to collect the faecal sample if they have very loose stools, and to wait until they return to a firmer state (i.e., Bristol stool chart type 5 or 6, if diarrhoea is frequent).

**Urine sample.** A mid-stream urine sample of approximately 10 to 20 mL is collected on day 2 (at first urination) into sterile urine specimen containers (the day after faecal sample collection).

**Saliva sample.** Participants collect two 3 mL saliva samples (by passive drool), one per day across two days (day 2 and day 3), into 10 mL Techno Plas sterile centrifuge tubes. Saliva samples are collected at awakening before eating or drinking. Participants are asked to complete a brief saliva record form.

**Hair sample.** A hair sample is collected by researchers at participants' homes. Hair sampling is carried out by combing and pinning the surrounding hair with clips, such that a 2 cm long by 0.5 cm wide scalp area is isolated on the posterior vertex (back of the head below the



1  
2  
3 inion;  $\sim 1 \text{ cm}^2$ ). Hair is then bound together (marking the scalp end) and cut with blunt-nose  
4 scissors as close to the scalp as possible.

5  
6 ***Phase 4 - additional questionnaire data (all participants)***

7  
8 Participants receive the Phase 4 questionnaires online, via Qualtrics. Phase 4  
9 questionnaires are completed within 24 hours of faecal sample collection. Participants in the  
10 ancillary questionnaire-only study complete Phase 4 questionnaires following Phase 1 (or  
11 whichever phase they are excluded from the case-control component). The Phase 4  
12 questionnaires cover demographic information (e.g., country of birth), early life history (e.g.,  
13 mode of birth, breastfeeding), history of gastric infections, and scales assessing psychopathology  
14 symptoms, stressful life events, early life adversity, diet, emotion regulation, and oral and  
15 physical health. The Phase 4 questionnaires take approximately 60 min. All questionnaires  
16 included in the Bugs and Brains Study are displayed in Table 2.  
17  
18  
19  
20  
21  
22  
23  
24  
25  
26  
27  
28  
29  
30  
31  
32  
33  
34  
35  
36  
37  
38  
39  
40  
41  
42  
43  
44  
45  
46  
47  
48  
49  
50  
51  
52  
53  
54  
55  
56  
57  
58  
59  
60

**Table 2.** Summary of questionnaire measures included in the Bugs and Brains Study

| Category                                | Questionnaire                                                                                                                                                                                                                                                                                         | Phase 1<br>(Screening<br>questionnaire) | Phase 2<br>(SCID-5-RV<br>interview) | Phase 4<br>(During sample<br>collection) |
|-----------------------------------------|-------------------------------------------------------------------------------------------------------------------------------------------------------------------------------------------------------------------------------------------------------------------------------------------------------|-----------------------------------------|-------------------------------------|------------------------------------------|
| <b>Demographic information</b>          | Phase 1 Health Questionnaire*                                                                                                                                                                                                                                                                         | ✓                                       |                                     |                                          |
|                                         | Phase 4 Demographics, Health and Exercise Questionnaire*                                                                                                                                                                                                                                              |                                         |                                     | ✓                                        |
| <b>Emotional functioning</b>            | Difficulties in Emotion Regulation Scale (DERS) [41]                                                                                                                                                                                                                                                  |                                         |                                     | ✓                                        |
| <b>Mental health and behaviour</b>      | Psychiatric Diagnostic Screening Questionnaire (PDSQ) [36]                                                                                                                                                                                                                                            | ✓                                       |                                     |                                          |
|                                         | Global Assessment of Functioning (GAF) † [37]                                                                                                                                                                                                                                                         |                                         | ✓                                   |                                          |
|                                         | Social and Occupational Functioning Assessment Scale (SOFAS) † [37]                                                                                                                                                                                                                                   |                                         | ✓                                   |                                          |
|                                         | Beck Depression Inventory (BDI-II) [42]                                                                                                                                                                                                                                                               |                                         |                                     | ✓                                        |
|                                         | Beck Anxiety Inventory (BAI) [43]                                                                                                                                                                                                                                                                     |                                         |                                     | ✓                                        |
|                                         | Adult Self Report (ASR) [44]                                                                                                                                                                                                                                                                          |                                         |                                     | ✓                                        |
| <b>Diet</b>                             | Dietary Questionnaire for Epidemiological Studies (DQES) [45]                                                                                                                                                                                                                                         |                                         |                                     | ✓                                        |
|                                         | Phase 1 Health Questionnaire* <ul style="list-style-type: none"> <li>Specific diet information (past four weeks; e.g. gluten-free, specific carbohydrates, FODMAP, vegetarian)</li> </ul>                                                                                                             | ✓                                       |                                     |                                          |
| <b>Exercise</b>                         | Phase 4 Demographics, Health and Exercise Questionnaire*                                                                                                                                                                                                                                              |                                         |                                     | ✓                                        |
| <b>Quality of life/wellbeing</b>        | The World Health Organization quality of life assessment (WHOQOL-BREF) [46]                                                                                                                                                                                                                           |                                         |                                     | ✓                                        |
| <b>Oral health</b>                      | The World Health Organization Oral Health Questionnaire for Adults [47]                                                                                                                                                                                                                               |                                         |                                     | ✓                                        |
| <b>Physical health /medical history</b> | The Physical Health Questionnaire (PHQ) [48]                                                                                                                                                                                                                                                          |                                         |                                     | ✓                                        |
|                                         | Phase 1 Health Questionnaire* <ul style="list-style-type: none"> <li>Current bacterial, fungal, or viral infection</li> <li>Obesity, hypertension, cardiovascular disease, respiratory disease, diabetes mellitus, liver cirrhosis, fatty liver disease, coeliac disease, other autoimmune</li> </ul> | ✓                                       |                                     |                                          |

| Category                               | Questionnaire                                                                                                                                                                                                                                                                                                                                                         | Phase 1<br>(Screening<br>questionnaire) | Phase 2<br>(SCID-5-RV<br>interview) | Phase 4<br>(During sample<br>collection) |
|----------------------------------------|-----------------------------------------------------------------------------------------------------------------------------------------------------------------------------------------------------------------------------------------------------------------------------------------------------------------------------------------------------------------------|-----------------------------------------|-------------------------------------|------------------------------------------|
|                                        | disease (e.g., rheumatoid arthritis, lupus, etc.), and polycystic ovary syndrome (PCOS)                                                                                                                                                                                                                                                                               |                                         |                                     |                                          |
|                                        | <ul style="list-style-type: none"> <li>• Current pregnancy/lactation</li> <li>• Mode of birth</li> <li>• Medication (past month): anti-depressants/anxiolytics, antibiotics, psychotropics, oral or injected steroids, probiotics, prebiotics, synbiotics, dietary supplements including laxatives; other Medication (past two weeks): NSAIDs, antifungals</li> </ul> |                                         |                                     |                                          |
| <b>Gastrointestinal health/history</b> | Rome IV Diagnostic Questionnaire (R4DQ) [34]                                                                                                                                                                                                                                                                                                                          | ✓                                       |                                     |                                          |
|                                        | Phase 1 Health Questionnaire*                                                                                                                                                                                                                                                                                                                                         |                                         |                                     |                                          |
|                                        | <ul style="list-style-type: none"> <li>• Non-surgical procedures related to the digestive system (past six months): enema, colonoscopy, gastroscopy, inflammatory bowel disease (e.g., ulcerative colitis, Crohn's disease), short bowel syndrome, history of abdominal surgery (e.g., appendectomy, ileostomy, bowel surgery, caesarean section, etc.)</li> </ul>    | ✓                                       |                                     |                                          |
|                                        | Phase 4 Demographics, Health and Exercise Questionnaire*                                                                                                                                                                                                                                                                                                              |                                         |                                     |                                          |
|                                        | <ul style="list-style-type: none"> <li>• Lifetime history of gastric infections: Salmonella, Shigella, Campylobacter, Giardia, Virus, Other</li> </ul>                                                                                                                                                                                                                |                                         |                                     | ✓                                        |
| <b>Stressful life events</b>           | The Lifetime Incidence of Traumatic Events (LITE) [49]                                                                                                                                                                                                                                                                                                                |                                         |                                     | ✓                                        |
|                                        | Childhood Trauma Questionnaire (CTQ) [50]                                                                                                                                                                                                                                                                                                                             |                                         |                                     | ✓                                        |
| <b>Substance use</b>                   | Phase 1 Health Questionnaire*                                                                                                                                                                                                                                                                                                                                         |                                         |                                     |                                          |
|                                        | <ul style="list-style-type: none"> <li>• Alcohol (past month)</li> <li>• Smoking (past month): tobacco cigarettes, vape, e-cigarettes containing nicotine</li> </ul>                                                                                                                                                                                                  | ✓                                       |                                     |                                          |
|                                        | Illicit drug use (past month)                                                                                                                                                                                                                                                                                                                                         |                                         |                                     |                                          |

| Category | Questionnaire                                                                                                   | Phase 1<br>(Screening<br>questionnaire) | Phase 2<br>(SCID-5-RV<br>interview) | Phase 4<br>(During sample<br>collection) |
|----------|-----------------------------------------------------------------------------------------------------------------|-----------------------------------------|-------------------------------------|------------------------------------------|
|          | <ul style="list-style-type: none"> <li>Dietary Questionnaire for Epidemiological Studies (DQES) [45]</li> </ul> |                                         |                                     | ✓                                        |

*Notes.* \* = designed specifically for the Bugs and Brains Study; † = measure completed by researchers, rather than participants; ‡ = modified version utilised, see Supplementary Materials; NSAIDS= nonsteroidal anti-inflammatory drugs; SCID-5-RV = Structured Clinical Interview for the Diagnostic and Statistical Manual fifth edition, research version

### **Gut and oral microbiota sequencing**

Amplicon 16S ribosomal ribonucleic acid (rRNA) gene sequencing will be used to estimate participants' microbiota from a faecal sample (gut microbiota) and a saliva sample (oral microbiota). Genomic DNA will be extracted using DNeasy PowerSoil<sup>®</sup> HTP kit (QIAGEN) and amplified using universal prokaryotic 515F and 806R primers targeting the V4 region of the 16S gene [51]. Sequences will be generated using paired-end sequencing on the Illumina MiSeq platform. Should additional funding be secured, shotgun metagenomic sequencing will be performed.

### **Metabolomics**

Nuclear magnetic resonance spectroscopy (NMR) will be run on faecal and urine samples to quantify metabolites. If additional funding is obtained, mass spectrometry metabolite assays will also be conducted.

### ***Sample Preparation***

**Faecal water.** A small proportion of the frozen faecal sample (0.5-1 g) will be homogenized by vortex in deuterated saline (0.9% NaCl) at 1:5 w/v before being centrifuged ( $3,200 \times g$ ) at 4 °C for 15 min. Faecal water will be syringe filtered (0.22  $\mu$ m, 33 mm diameter) and dispensed into 700  $\mu$ L aliquots.

**Urine.** Frozen urine samples will be thawed in ice baths, syringe filtered (0.22  $\mu$ m, 33 mm diameter) and each dispensed into 700  $\mu$ L aliquots.

**Metabolite extraction.** Faecal and urine samples will be prepared for NMR analysis using a liquid-liquid extraction technique [52]. A 250  $\mu$ L aliquot of each faecal water/urine sample will be added to 250  $\mu$ L ice-cold deuterated chloroform and 250  $\mu$ L ice-cold deuterated methanol and mixed by vortex before being left on ice for 15 min. Samples are then centrifuged ( $16,000 \times g$ ) at 4 °C for 10 min to produce a biphasic mixture with a hydrophilic phase of water/deuterated methanol containing polar metabolites and lipophilic phase of deuterated chloroform containing lipophilic compounds.

### ***Nuclear magnetic resonance spectroscopy (NMR)***

A 297  $\mu$ L sample of the top hydrophilic layer will be added to equal volume of 200 mM sodium phosphate in <sup>2</sup>H<sub>2</sub>O (pH 7.4) and 66  $\mu$ L of <sup>2</sup>H<sub>2</sub>O containing 5 mM 3-(Trimethylsilyl)-1-propanesulfonic acid-d<sub>6</sub> sodium salt and 0.2% (w/v) sodium azide to make a total of 660  $\mu$ L. The

1  
2  
3 sample will be mixed by vortex, centrifuged at  $16,000 \times g$  for 1 min, and 550  $\mu\text{L}$  of supernatant  
4 transferred to a 7-inch 5-mm 507-grade Bruker NMR tube for NMR analysis.

5  
6 All NMR spectra of faecal water and urine will be collected using Bruker 600 MHz  
7 spectrometer set to a constant temperature of 300 K. Standard 1D  $^1\text{H}$  spectra will be acquired for  
8 faecal water using 1D NOESY pulse sequence (recycle delay- $90^\circ$ - $t_1$ - $90^\circ$ - $t_m$ -acquire) with  $t_1$   
9 corresponding to 3  $\mu\text{s}$ ,  $t_m$  to 10 ms and the  $90^\circ$  pulses optimised. Water suppression will be  
10 achieved by pre-saturation of the water signal during  $t_m$  and the recycle delay (4 s). Each  
11 spectrum will be collected over 64 K data points and 256 scans with spectral width of 20 ppm  
12 [53].  
13  
14  
15  
16  
17  
18

19 Urine spectra are acquired using the same 1D NOESY pulse sequence where recycle  
20 delay corresponded to 2 s,  $t_1$  to 3  $\mu\text{s}$  and  $t_m$  to 10 ms. Each spectrum will be collected over 32 K  
21 data points and 64 scans with spectral width of 20 ppm [54]. Using the Chenomx NMR Suite  
22 Professional software package, the free induction decay is multiplied by 0.3 Hz exponential line  
23 broadening and zero-filled before Fourier transformation. Spectra are manually phased, baseline  
24 corrected and referenced to DSS with a chemical shift of 0 ppm. The compound libraries in the  
25 Chenomx software will be used to identify and quantitate metabolites in the NMR 1D  $^1\text{H}$  spectra  
26 based on their characteristic chemical shifts using 5 mM DSS as an internal chemical shift  
27 reference.  
28  
29  
30  
31  
32  
33

### 34 **Immune and endocrine assays**

35  
36 Hormones will be assayed from hair and saliva samples to estimate longer and shorter-  
37 term endocrine functioning, respectively. The hormones cortisol, DHEA and testosterone will be  
38 assayed to provide an indication of hypothalamic-pituitary-adrenal axis secretion. Systemic  
39 inflammation will be estimated using the acute phase C-reactive protein (CRP), as previously  
40 described [55]. Assays for hormones and CRP will be conducted using enzyme-linked  
41 immunosorbent assay kits and performed in duplicate, following manufacturer protocols.  
42  
43  
44  
45

### 46 **Pre-processing of bacterial sequencing data**

47  
48 Sequencing reads will be quality filtered, trimmed, denoised and merged using QIIME2  
49 [56]. The DADA2 denoising pipeline will be used for correcting sequence errors and identifying  
50 amplicon sequence variants (ASVs, i.e., sequences not containing errors) [57]. ASVs will be  
51 taxonomically assigned using a Naïve-Bayes classifier against the most recent version of the  
52  
53  
54  
55  
56  
57  
58  
59  
60

1  
2  
3 Human Oral Microbiome Database (saliva) and SILVA databases (faecal). Sequences will be  
4 aligned using MAFFT [58], and phylogeny built using FastTree 2 [59].

### 6 **Sample size calculation**

8 A sample of 132 would provide 80% power at  $p = 0.01$  to detect an effect size of 0.35  
9 when comparing outcomes across the four groups (i.e., anxiety/depression, IBS, comorbidity,  
10 controls). This estimate is conservative given the effect sizes reported in related research, and our  
11 sample size of 160 exceeds this recommendation.  
12  
13  
14

### 15 **Data analysis**

16  
17 Proposed analyses will be discipline-specific (microbial, metabolomics, immune and  
18 endocrine), but will also utilise systems biology to integrate the wide range of acquired  
19 biological, health, and psychosocial data. General linear models will investigate the relationships  
20 between mental health, dietary patterns, exercise, GI health, oral health, early life adversity,  
21 substance use (including alcohol), and medical history in the questionnaire-only ancillary study.  
22 These analyses may inform necessary metadata to consider in analyses of the primary case-  
23 control component. Sources of inter-study variation identified in previous investigations of the  
24 gut microbiota will be examined [31, 60].  
25  
26  
27  
28  
29  
30

31 A primary aim of the case-control component involves characterising and comparing the  
32 microbiota and metabolome in the four participant groups (i.e., anxiety/depression, IBS,  
33 comorbidity, controls). Between and within-sample diversity will be conducted using alpha  
34 diversity (Shannon and Simpson indices, Faith's phylogenetic diversity, observed number of  
35 ASVs [richness]), and beta diversity (PCoA using weighted and unweighted UniFrac distances,  
36 examined statistically using PERMANOVA). Differential abundance of microbial taxa will be  
37 examined at several levels of the taxonomy (phylum, order, family, genus levels) using packages  
38 suited to compositional data: ANCOM-BC [61] and MaAsLin2 [62], correcting for multiple  
39 comparisons (Benjamini Hochberg False Discovery Rate). Associations between taxa abundance  
40 and metadata will also be analysed using these packages. All statistical analyses and graphical  
41 representations will be conducted using R, with packages that enable multivariate modelling and  
42 visualizations (e.g., vegan [63]; phyloseq [64]; ggplot2 [65]; ANCOM-BC [61]; MaAsLin2  
43 [62]). It will also integrate the wide range of biological data and adopt a systems biology  
44 approach using the package mixOmics [66].  
45  
46  
47  
48  
49  
50  
51  
52  
53  
54

### 55 **Ethics and dissemination**

Ethical approval for this project was granted by the University of Melbourne Human Research Ethics Committee (#1749221). After reading our Plain Language Statement, a comprehensive consent procedure is conducted via telephone with all participants. The voluntary nature of the study is explained, including the limits of confidentiality, the secure and de-identified nature of all data, and the right to withdraw at any time without prejudice or explanation. Verbal consent is recorded at the end of the first phone call, should the participant wish to begin their participation. Written consent is obtained from participants in the case-control component following sample collection.

### **Patient and public involvement**

There were no funds or time allocated for patient and public involvement, therefore we were unable to engage patients in study design and recruitment. We have invited participants to assist with the development of our dissemination strategy.

### **Progress to date**

Of the 775 participants who have completed the Phase 1 questionnaire since the end of 2017, 211 have met screening criteria and were invited to the SCID-5-RV interview (Phase 2). At interview, 53 participants met exclusion criteria relating to psychiatric diagnosis. Several participants were unable to complete kit collection, moved locations, or began exclusionary medications. Accordingly, 140 of 160 participants have completed the case-control component. A total of 352 of the planned 1000 participants have completed the ancillary questionnaire-only component (Phases 1 and 4).

### **Discussion**

The high rates of co-occurrence between anxiety, depression and IBS remain poorly understood, although interactions between host physiology and the microbiota provide a promising avenue to investigate possible shared underlying mechanisms. The Bugs and Brains Study will be the first research project to investigate and compare the oral and gut microbiota and metabolome of participants with anxiety/depression, IBS, comorbid anxiety/depression and IBS, and controls, as assessed by clinical diagnosis and gold standard criteria. Moreover, it will analyse hypothesised underlying mechanisms, including immune, endocrine, and microbial factors, and maintain strict inclusion and exclusion criteria. The questionnaire-only study will examine correlates of GI and mental health symptoms that have been insufficiently examined to date, including diet, exercise, oral health, substance use, medical history, early life adversity, and



1  
2  
3 psychosocial factors. Via a comprehensive analysis of symptom-based questionnaire data and  
4 detailed characterisation of physiological, microbial and psychological profiles, the Bugs and  
5 Brains Study may inform the development of targeted interventions for the millions of  
6  
7 individuals living with anxiety, depression and/or IBS.  
8  
9

### 11 **Author contributions**

12 JGS conceived the study, with critical input from NH, OS, SW, CAS, BC, SD, PG, NOS, CB,  
13 KH, and DE. CAS, JGS and KH wrote the manuscript, and CAS devised the analytical strategy.  
14 All authors critically revised and approved the final manuscript.  
15  
16  
17

### 18 **Funding statement**

19 This research is funded by the Melbourne School of Psychological Sciences. Carra Simpson is  
20 supported by the Australian Government Research Training Program. This work was funded by  
21 the National Health and Medical Research Council (Career Development Fellowship to SW, ID  
22 1125504).  
23  
24  
25  
26

27 **Competing interests statement:** None declared

### 28 **Acknowledgments**

29 Authors would like to thank all staff, students, and volunteers on the Bugs and Brains Study, as  
30 well as all participants who graciously gave their time to this research. Authors report no actual  
31 or perceived conflicts of interest.  
32  
33  
34  
35

### 36 **Figure caption**

37 *Figure 1.* Phases of participation in the Bugs and Brains Study. Participants eligible for the  
38 primary case-control component at Phases 1 and 2 complete all phases of the study within a  
39 month, including biological sample collection ( $N = 160$ ;  $n = 40$  with IBS,  $n = 40$  with anxiety  
40 and/or depressive disorder,  $n = 40$  with IBS and anxiety and/or depressive disorder,  $n = 40$   
41 controls with no lifetime history of either IBS or an anxiety/depressive disorder). Participants  
42 who decline sample collection, or are not eligible for the primary component, complete the  
43 questionnaire-only ancillary component (Phases 1 and 4;  $N = 1000$ ). GAF = Global Assessment  
44 of Functioning; IBS = irritable bowel syndrome; SOFAS = Social and Occupational Functioning  
45 Assessment Scale; Structured Clinical Interview for the Diagnostic and Statistical Manual  
46 (DSM) 5<sup>th</sup> edition (Research version [SCID-5-RV]). Created with BioRender.com.  
47  
48  
49  
50  
51  
52  
53  
54  
55  
56  
57  
58  
59  
60

## References

- 1 Neuman H, Debelius JW, Knight R, *et al.* Microbial endocrinology: the interplay between the microbiota and the endocrine system. *FEMS Microbiol Rev* 2015;**39**:509–21. doi:10.1093/femsre/fuu010
- 2 Kamada N, Seo SU, Chen GY, *et al.* Role of the gut microbiota in immunity and inflammatory disease. *Nat Rev Immunol* 2013;**13**:321–35. doi:10.1038/nri3430
- 3 Sikander A, Rana SV, Prasad KK. Role of serotonin in gastrointestinal motility and irritable bowel syndrome. *Clin Chim Acta* 2009;**403**:47–55. doi:10.1016/j.cca.2009.01.028
- 4 Martinez FD. The human microbiome. Early life determinant of health outcomes. *Ann Am Thorac Soc* 2014;**11 Suppl 1**:S7-12. doi:10.1513/AnnalsATS.201306-186MG
- 5 Lovell RM, Ford AC. Global Prevalence of and Risk Factors for Irritable Bowel Syndrome: A Meta-analysis. *Clin Gastroenterol Hepatol* 2012;**10**:712–21. doi:10.1016/j.cgh.2012.02.029
- 6 World Health Organization. Depression and Other Common Mental Health Disorders: Global Health Estimates. 2017.<http://apps.who.int/iris/bitstream/handle/10665/254610/WHO-MSD-MER-2017.2-eng.pdf;jsessionid=D7B089CDA4A6FD66BD711AE0E39C4511?sequence=1> (accessed 17 Jul 2019).
- 7 Pinto-Sanchez MI, Ford AC, Avila CA, *et al.* Anxiety and depression increase in a stepwise manner in parallel with multiple FGIDs and symptom severity and frequency. *Am J Gastroenterol* 2015;**110**:1038–48. doi:10.1038/ajg.2015.128
- 8 Banerjee A, Sarkhel S, Sarkar R, *et al.* Anxiety and Depression in Irritable Bowel Syndrome. *Indian J Psychol Med* 2017;**39**:741–5. doi:10.4103/IJPSYM.IJPSYM\_46\_17
- 9 Fond G, Loundou A, Hamdani N, *et al.* Anxiety and depression comorbidities in irritable bowel syndrome (IBS): a systematic review and meta-analysis. *Eur Arch Psychiatry Clin Neurosci* Published Online First: 2014. doi:10.1007/s00406-014-0502-z
- 10 Kurokawa S, Kishimoto T, Mizuno S, *et al.* The effect of fecal microbiota transplantation

- 1  
2  
3 on psychiatric symptoms among patients with irritable bowel syndrome, functional  
4 diarrhea and functional constipation: An open-label observational study. *J Affect Disord*  
5 2018;**235**:506–12. doi:10.1016/j.jad.2018.04.038  
6  
7  
8  
9 11 Sibelli A, Chalder T, Everitt H, *et al.* A systematic review with meta-analysis of the role  
10 of anxiety and depression in irritable bowel syndrome onset. *Psychol Med* 2016;**46**:3065–  
11 80. doi:10.1017/S0033291716001987  
12  
13  
14  
15 12 Jiang H, Zhang X, Yu Z, *et al.* Altered gut microbiota profile in patients with generalized  
16 anxiety disorder. *J Psychiatr Res* 2018;**104**:130–6. doi:10.1016/j.jpsychires.2018.07.007  
17  
18  
19 13 Winter G, Hart RA, Charlesworth RPG, *et al.* Gut microbiome and depression: What we  
20 know and what we need to know. *Rev Neurosci* 2018;**29**:629–43. doi:10.1515/revneuro-  
21 2017-0072  
22  
23  
24  
25 14 Simpson CA, Mu A, Haslam N, *et al.* Feeling down? A systematic review of the gut  
26 microbiota in anxiety/depression and irritable bowel syndrome. *J Affect Disord*  
27 2020;**266**:429–46. doi:10.1016/j.jad.2020.01.124  
28  
29  
30  
31 15 Pittayanon R, Lau JT, Yuan Y, *et al.* Gut microbiota in patients with irritable bowel  
32 syndrome-a systematic review. *Gastroenterology* 2019;**157**:97–108.  
33  
34  
35 16 Aizawa E, Tsuji H, Asahara T, *et al.* Possible association of Bifidobacterium and  
36 Lactobacillus in the gut microbiota of patients with major depressive disorder. *J Affect*  
37 *Disord* 2016;**202**:254–7. doi:10.1016/j.jad.2016.05.038  
38  
39  
40  
41 17 Liu Y, Zhang L, Wang X, *et al.* Similar Fecal Microbiota Signatures in Patients With  
42 Diarrhea-Predominant Irritable Bowel Syndrome and Patients With Depression. *Clin*  
43 *Gastroenterol Hepatol* 2016;**14**:1602-1611.e5. doi:10.1016/j.cgh.2016.05.033  
44  
45  
46  
47 18 Tap J, Derrien M, Törnblom H, *et al.* Identification of an Intestinal Microbiota Signature  
48 Associated With Severity of Irritable Bowel Syndrome. *Gastroenterology* 2017;**152**:111-  
49 123.e8. doi:10.1053/j.gastro.2016.09.049  
50  
51  
52  
53 19 Labus JS, Hollister EB, Jacobs J, *et al.* Differences in gut microbial composition correlate  
54 with regional brain volumes in irritable bowel syndrome. *Microbiome* 2017;**5**:1–17.  
55 doi:10.1186/S40168-017-0260-Z  
56  
57  
58  
59

- 1  
2  
3 20 Sundin J, Rangel I, Fuentes S, *et al.* Altered faecal and mucosal microbial composition in  
4 post-infectious irritable bowel syndrome patients correlates with mucosal lymphocyte  
5 phenotypes and psychological distress. *Aliment Pharmacol Ther* 2015;**41**:342–51.  
6 doi:10.1111/apt.13055  
7  
8  
9  
10  
11 21 Deo PN, Deshmukh R. Oral microbiome: Unveiling the fundamentals. *J Oral Maxillofac*  
12 *Pathol* 2019;**23**:122–8. doi:10.4103/jomfp.JOMFP\_304\_18  
13  
14  
15 22 Turnbaugh PJ, Ley RE, Hamady M, *et al.* The human microbiome project. *Nature*  
16 2007;**449**.  
17  
18  
19 23 Olsen I, Yamazaki K. Can oral bacteria affect the microbiome of the gut? *J Oral*  
20 *Microbiol* 2019;**11**:1586422. doi:10.1080/20002297.2019.1586422  
21  
22  
23 24 Simpson CA, Adler C, du Plessis MR, *et al.* Oral microbiome composition, but not  
24 diversity, is associated with adolescent anxiety and depression symptoms. *Physiol Behav*  
25 2020;**226**:113126. doi:10.1016/j.physbeh.2020.113126  
26  
27  
28  
29 25 Valles-Colomer M, Falony G, Darzi Y, *et al.* The neuroactive potential of the human gut  
30 microbiota in quality of life and depression. *Nat Microbiol* 2019;**4**:623–32.  
31 doi:10.1038/s41564-018-0337-x  
32  
33  
34  
35 26 Flowers SA, Ellingrod VL. The Microbiome in Mental Health: Potential Contribution of  
36 Gut Microbiota in Disease and Pharmacotherapy Management. *Pharmacotherapy*. 2015.  
37 doi:10.1002/phar.1640  
38  
39  
40  
41 27 Capurso G, Lahner E. The interaction between smoking, alcohol and the gut microbiome.  
42 *Best Pract Res Clin Gastroenterol* 2017;**31**:579–88. <http://10.0.3.248/j.bpg.2017.10.006>  
43  
44  
45 28 Ma Z (Sam), Li W. How and Why Men and Women Differ in Their Microbiomes:  
46 Medical Ecology and Network Analyses of the Microgenderome. *Adv Sci*  
47 2019;**6**:1902054. doi:10.1002/advs.201902054  
48  
49  
50  
51 29 Dash S, Clarke G, Berk M, *et al.* The gut microbiome and diet in psychiatry: focus on  
52 depression. *Curr Opin Psychiatry* 2015;**28**:1–6. doi:10.1097/YCO.000000000000117  
53  
54  
55 30 Kolodziejczyk AA, Zheng D, Elinav E. Diet–microbiota interactions and personalized  
56  
57  
58  
59  
60

- 1  
2  
3 nutrition. *Nat Rev Microbiol* 2019;**17**:742–53. doi:10.1038/s41579-019-0256-8  
4  
5  
6 31 Simpson CA, Schwartz OS, Simmons JG. The human gut microbiota and depression:  
7 widely reviewed, yet poorly understood. *J. Affect. Disord.* 2020;**274**:73–5.  
8 doi:10.1016/j.jad.2020.05.115  
9  
10  
11 32 Canavan C, West J, Card T. The epidemiology of irritable bowel syndrome. *Clin*  
12 *Epidemiol* 2014;**6**:71–80. doi:10.2147/CLEP.S40245  
13  
14  
15 33 First M, Williams J, Karg R, *et al.* *Structured Clinical interview for DSM-5, Research*  
16 *Version (SCID-5 for DSM-5, Research Version; SCID-5-RV)*. Arlington, VA: : American  
17 Psychiatric Association 2015.  
18  
19  
20  
21 34 Drossman DA, Hasler WL. Introduction: Rome IV—Functional GI Disorders: Disorders  
22 of Gut-Brain Interaction. *Gastroenterology* 2016;**150**:1257–  
23 61. <http://10.0.4.29/j.gastro.2016.03.035>  
24  
25  
26  
27 35 Drossman DA. Functional gastrointestinal disorders: History, pathophysiology, clinical  
28 features, and Rome IV. *Gastroenterology* 2016;**150**:1262-1279e2.  
29 doi:10.1053/j.gastro.2016.02.032  
30  
31  
32  
33 36 Zimmerman M, Mattia JI. A Self-Report Scale to Help Make Psychiatric Diagnoses: The  
34 Psychiatric Diagnostic Screening Questionnaire. *Arch Gen Psychiatry* 2001;**58**:787–94.  
35 doi:10.1001/archpsyc.58.8.787  
36  
37  
38  
39 37 American Psychiatric Association. *American Psychiatric Association: Diagnostic and*  
40 *Statistical Manual of Mental Disorders, Fourth Edition, Text Revision (DSM-IV-TR)*.  
41 Washington, DC: American Psychiatric Association 2000.  
42  
43  
44  
45 38 Gerdtz MF, Daniel C, Dearie V. The Management of Clinical Aggression-Rapid  
46 Emergency Department Intervention “MOCA-REDI”: An outcome evaluation. *Australas*  
47 *Emerg Nurs J* 2011;**14**:S12. doi:10.1016/j.aenj.2011.09.033  
48  
49  
50  
51 39 Gandara BK, Leresche L, Mancl L. Patterns of salivary estradiol and progesterone across  
52 the menstrual cycle. *Ann N Y Acad Sci* 2007;**1098**:446–50. doi:10.1196/annals.1384.022  
53  
54  
55 40 Baker JM, Al-Nakkash L, Herbst-Kralovetz MM. Estrogen–gut microbiome axis:  
56  
57  
58  
59  
60

- 1  
2  
3 Physiological and clinical implications. *Maturitas* 2017;**103**:45–53.  
4 doi:<https://doi.org/10.1016/j.maturitas.2017.06.025>  
5  
6  
7  
8 41 Gratz KL, Roemer L. Multidimensional Assessment of Emotion Regulation and  
9 Dysregulation: Development, Factor Structure, and Initial Validation of the Difficulties in  
10 Emotion Regulation Scale. *J Psychopathol Behav Assess* 2004;**26**:41–54.  
11 doi:10.1023/B:JOBA.0000007455.08539.94  
12  
13  
14  
15 42 Beck A., Steer R., Brown G. *Manual for the Beck Depression Inventory-II*. San Antonio,  
16 TX: : Psychological Corporation 1996.  
17  
18  
19 43 Beck A., Streer R. *Beck Anxiety Inventory Manual*. San Antonio, TX: : Psychological  
20 Corporation 1993.  
21  
22  
23 44 Achenbach T, Rescorla L. *Manual for the ASEBA adult forms & profiles*. Burlington: :  
24 University of Vermont, Research Center for Children, Youth, and Families 2003.  
25  
26  
27 45 Giles G, Ireland P. *Dietary Questionnaire for Epidemiological Studies (Version 3.2)*.  
28 Melbourne: Cancer Council Victoria 1996.  
29  
30  
31 46 The WHOQOL Group. The World Health Organization quality of life assessment  
32 (WHOQOL): Development and general psychometric properties. *Soc Sci Med*  
33 1998;**46**:1569–85. doi:[https://doi.org/10.1016/S0277-9536\(98\)00009-4](https://doi.org/10.1016/S0277-9536(98)00009-4)  
34  
35  
36  
37 47 World Health Organization. *Oral health surveys: Basic Methods*. 5th ed. World Health  
38 Organization 1987.  
39  
40  
41 48 Schat ACH, Kelloway EK, Desmarais S. The Physical Health Questionnaire (PHQ):  
42 construct validation of a self-report scale of somatic symptoms. *J Occup Health Psychol*  
43 2005;**10**:363–81. doi:10.1037/1076-8998.10.4.363  
44  
45  
46  
47 49 Greenwald R, Rubin A. Assessment of posttraumatic symptoms in children: Development  
48 and preliminary validation of parent and child scales. *Res. Soc. Work Pract.* 1999;**9**:61–  
49 75. doi:10.1177/104973159900900105  
50  
51  
52  
53 50 Berstein D., Fink L. *Childhood Trauma Questionnaire: A retrospective self-report*  
54 *manual*. San Antonio, TX: Psychological Corporation 1998.  
55  
56  
57  
58  
59  
60

- 1  
2  
3 51 Caporaso JG, Lauber CL, Walters WA, *et al.* Global patterns of 16S rRNA diversity at a  
4 depth of millions of sequences per sample. *Proc Natl Acad Sci* 2011;**108**:4516 LP – 4522.  
5 doi:10.1073/pnas.1000080107  
6  
7  
8  
9 52 Sheedy JR, Ebeling PR, Gooley PR, *et al.* A sample preparation protocol for 1H nuclear  
10 magnetic resonance studies of water-soluble metabolites in blood and urine. *Anal Biochem*  
11 2010;**398**:263.doi.10.1016/j.ab.2009.11.027  
12  
13  
14  
15 53 Gratton J, Phetcharaburanin J, Mullish BH, *et al.* Optimized Sample Handling Strategy for  
16 Metabolic Profiling of Human Feces. *Anal Chem*  
17 2016;**88**:4661.doi.org/10.1021/acs.analchem.5b04159  
18  
19  
20  
21 54 Beckonert O, Keun HC, Ebbels TM, *et al.* Metabolic profiling, metabolomic and  
22 metabonomic procedures for NMR spectroscopy of urine, plasma, serum and tissue  
23 extracts. *Nat Protoc* 2007;**2**:2692.https://doi.org/10.1038/nprot.2007.376  
24  
25  
26  
27 55 Byrne ML, Horne S, O'Brien-Simpson NM, *et al.* Associations between observed  
28 parenting behavior and adolescent inflammation two and a half years later in a community  
29 sample. *Heal. Psychol.* 2017;**36**:641–51. doi:10.1037/hea0000502  
30  
31  
32  
33 56 Bolyen E, Rideout JR, Dillon MR, *et al.* Reproducible, interactive, scalable and extensible  
34 microbiome data science using QIIME 2. *Nat Biotechnol* 2019;**37**:852–7.  
35 doi:10.1038/s41587-019-0209-9  
36  
37  
38  
39 57 Callahan BJ, McMurdie PJ, Rosen MJ, *et al.* DADA2: High-resolution sample inference  
40 from Illumina amplicon data. *Nat Methods* 2016;**13**:581–3. doi:10.1038/nmeth.3869  
41  
42  
43 58 Katoh K, Misawa K, Kuma K, *et al.* MAFFT: a novel method for rapid multiple sequence  
44 alignment based on fast Fourier transform. *Nucleic Acids Res* 2002;**30**.  
45 doi:10.1093/nar/gkf436  
46  
47  
48  
49 59 Price MN, Dehal PS, Arkin AP. FastTree 2—approximately maximum-likelihood trees for  
50 large alignments. *PLoS One* 2010;**5**. doi:10.1371/journal.pone.0009490  
51  
52  
53 60 Simpson CA, Mu A, Haslam N, *et al.* Feeling down? A systematic review of the gut  
54 microbiota in anxiety/depression and irritable bowel syndrome. *J Affect Disord*  
55 2020;**266**:429–46. doi:10.1016/j.jad.2020.01.124  
56  
57  
58  
59  
60



- 1  
2  
3 61 Lin H, Peddada S Das. Analysis of compositions of microbiomes with bias correction. *Nat*  
4 *Commun* 2020;**11**:3514. doi:10.1038/s41467-020-17041-7  
5  
6  
7 62 Mallick H, McIver LJ, Rahnavard A, *et al.* Multivariable Association in Population-scale  
8 Meta-omics Studies. 2020.<http://huttenhower.sph.harvard.edu/maaslin2>  
9  
10  
11 63 Oksanen J, Blanchet FG, Kindt R, *et al.* *Vegan: community ecology package*. 2012.  
12 <https://cran.r-project.org/web/packages/vegan/index.html>  
13  
14  
15 64 McMurdie PJ, Holmes S. Phyloseq: An R Package for Reproducible Interactive Analysis  
16 and Graphics of Microbiome Census Data. *PLoS One* 2013;**8**.  
17 doi:10.1371/journal.pone.0061217  
18  
19  
20  
21 65 Wickham H. *ggplot2: Elegant Graphics for Data Analysis*. New York: Springer-Verlag  
22 2016. <https://ggplot2.tidyverse.org>  
23  
24  
25 66 Rohart F, Gautier B, Singh A, *et al.* mixOmics: an R package for ‘omics feature selection  
26 and multiple data integration. *bioRxiv* 2017;108597. doi:10.1101/108597  
27  
28  
29  
30  
31  
32  
33  
34  
35  
36  
37  
38  
39  
40  
41  
42  
43  
44  
45  
46  
47  
48  
49  
50  
51  
52  
53  
54  
55  
56  
57  
58  
59  
60



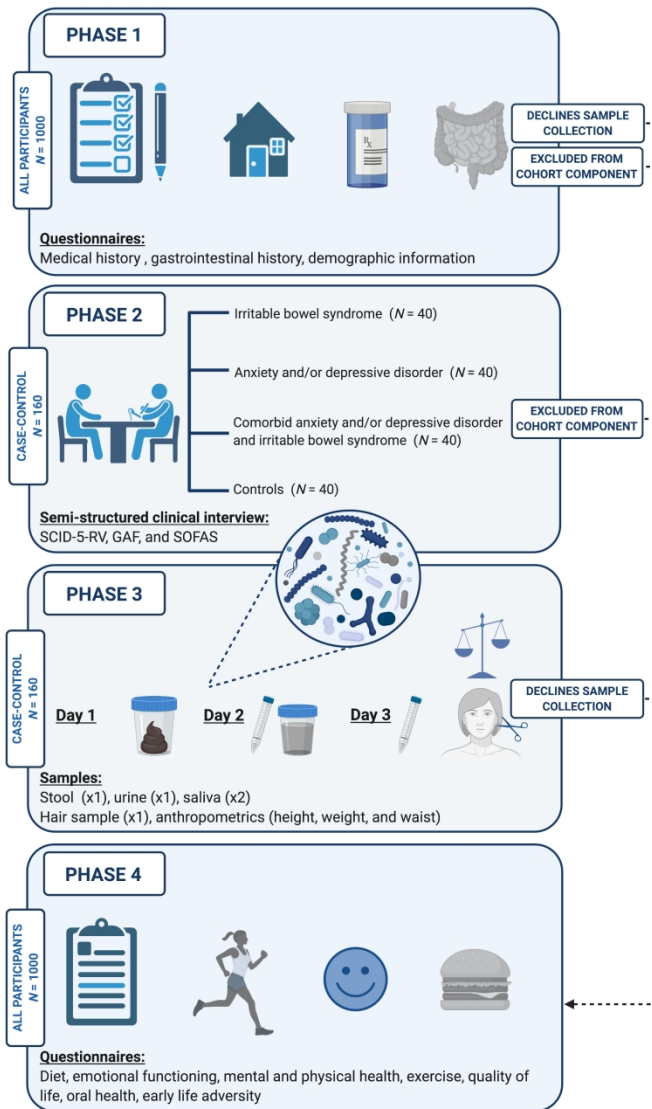

Figure 1. Phases of participation in the Bugs and Brains study. Participants eligible for the primary case-control sample collection at Phases 1 and 2 complete all phases of the study within a month, including biological sample collection (N = 160; n = 40 with IBS, n = 40 with anxiety and/or depressive disorder, n = 40 with IBS and anxiety and/or depressive disorder, n = 40 with no lifetime history of either IBS or an anxiety/depressive disorder). Participants who decline sample collection or are not eligible for the primary component complete the questionnaire-only ancillary component (Phases 1 and 4; N = 1000). GAF = Global Assessment of Functioning; IBS = irritable bowel syndrome; SOFAS = Social and Occupational Functioning Assessment Scale; Structured Clinical Interview for the Diagnostic and Statistical Manual (DSM) 5th edition (Research version [SCID-5-RV]). Created with BioRender.com.

**Table S1.** Disorders assessed by the modified SCID-5-RV utilised by the Bugs and Brains study

| Disorder                                             | Duration assessed at interview        | Eligibility Status                                                                                          |
|------------------------------------------------------|---------------------------------------|-------------------------------------------------------------------------------------------------------------|
| <u>Bipolar and related disorders</u>                 |                                       |                                                                                                             |
| Bipolar I Disorder                                   | Lifetime and past month (current)     | } X Exclusion (all groups)                                                                                  |
| Bipolar II Disorder                                  | Lifetime and past month (current)     |                                                                                                             |
| Cyclothymic Disorder                                 | Past 2 years (current)                |                                                                                                             |
| Other Specified Bipolar Disorder                     | Lifetime and past month (current)     |                                                                                                             |
| Bipolar Disorder Due to Another Medical Condition    | Lifetime and past month (current)     |                                                                                                             |
| Substance/Medication-Induced Bipolar Disorder        | Lifetime and past month (current)     |                                                                                                             |
| <u>Depressive disorders</u>                          |                                       |                                                                                                             |
| Major Depressive Disorder                            | Lifetime and past month (current)     | } ✓ Current = Inclusion (MH and Comorbid)<br>- Lifetime = Neither inclusion nor exclusion (MH and Comorbid) |
| Persistent Depressive Disorder                       | Lifetime and past two years (current) |                                                                                                             |
|                                                      |                                       | } X Lifetime = Exclusion (Controls and IBS)                                                                 |
| Premenstrual Dysphoric Disorder                      | Past 12 months (current)              | } - Lifetime = Neither inclusion nor exclusion                                                              |
| Other Specified Depressive Disorder                  | Lifetime and past month (current)     | } - Lifetime = Neither inclusion nor exclusion (MH and Comorbid)                                            |
| Depressive Disorder Due to Another Medical Condition | Lifetime and past month (current)     |                                                                                                             |
| Substance/Medication-Induced Depressive Disorder     | Lifetime and past month (current)     |                                                                                                             |
|                                                      |                                       | } X Lifetime = Exclusion (Controls and IBS)                                                                 |
| <u>Schizophrenia and other psychotic disorders</u>   |                                       |                                                                                                             |
| Clinical psychotic symptoms                          | Lifetime and current                  | } X Exclusion (all groups)                                                                                  |
| <u>Substance use disorders</u>                       |                                       |                                                                                                             |
| Alcohol                                              | Past 12 months (current)              | } X Exclusion (all groups)                                                                                  |

| Disorder                                                                   | Duration assessed at interview         | Eligibility Status                                               |
|----------------------------------------------------------------------------|----------------------------------------|------------------------------------------------------------------|
| Sedative-Hypnotic-Anxiolytic                                               | Past 12 months (current)               | }                                                                |
| Cannabis                                                                   | Past 12 months (current)               |                                                                  |
| Stimulants/Cocaine                                                         | Past 12 months (current)               |                                                                  |
| Opioids                                                                    | Past 12 months (current)               |                                                                  |
| Phencyclidine (PCP)                                                        | Past 12 months (current)               |                                                                  |
| Other Hallucinogens                                                        | Past 12 months (current)               |                                                                  |
| Inhalants                                                                  | Past 12 months (current)               |                                                                  |
| Other/Unknown                                                              | Past 12 months (current)               |                                                                  |
| <u>Anxiety disorders</u>                                                   |                                        |                                                                  |
| Panic Disorder                                                             | Lifetime and past month (current)      | } ✓ Current = Inclusion (MH and Comorbid)                        |
| Agoraphobia                                                                | Lifetime and past six months (current) |                                                                  |
| Social Anxiety Disorder                                                    | Lifetime and past six months (current) |                                                                  |
| Generalized Anxiety Disorder                                               | Lifetime and past six months (current) |                                                                  |
| <hr/>                                                                      |                                        |                                                                  |
| Specific Phobia                                                            | Lifetime and past six months (current) | } - Lifetime = Neither inclusion nor exclusion (MH and Comorbid) |
| Other Specified Anxiety Disorder                                           | Lifetime and past month (current)      |                                                                  |
| Anxiety Disorder Due to Another Medical Condition                          | Lifetime and past month (current)      |                                                                  |
| Substance/Medication-Induced Anxiety Disorder                              | Lifetime and past month (current)      |                                                                  |
| <hr/>                                                                      |                                        |                                                                  |
| <u>Obsessive-compulsive and related disorders</u>                          |                                        |                                                                  |
| Obsessive Compulsive Disorder                                              | Lifetime and past month (current)      | } - Lifetime = Neither inclusion nor exclusion (MH and Comorbid) |
| Other Specified Obsessive Compulsive and Related Disorder                  | Lifetime and past month (current)      |                                                                  |
| Obsessive-Compulsive and Related Disorder Due to Another Medical Condition | Lifetime and past month (current)      |                                                                  |
| Substance/Medication-Induced Obsessive-Compulsive and Related Disorder     | Lifetime and past month (current)      |                                                                  |
| <hr/>                                                                      |                                        |                                                                  |
|                                                                            |                                        | } ✗ Lifetime = Exclusion (Controls and IBS)                      |

| Disorder                                       | Duration assessed at interview             | Eligibility Status                                                                          |
|------------------------------------------------|--------------------------------------------|---------------------------------------------------------------------------------------------|
| <u>Sleep-wake disorders</u>                    |                                            |                                                                                             |
| Insomnia Disorder                              | Past three months (current)                | } - Lifetime = Neither inclusion nor exclusion (MH and Comorbid)                            |
| Hypersomnolence Disorder                       | Past three months (current)                |                                                                                             |
| Substance-Induced Sleep Disorder               | Past three months (current)                |                                                                                             |
| <u>Feeding and Eating Disorders</u>            |                                            |                                                                                             |
| Anorexia Nervosa                               | Past 12 months and past 3 months (current) | } X Exclusion (all groups)                                                                  |
| Bulimia Nervosa                                | Past 12 months and past 3 months (current) |                                                                                             |
| Binge Eating Disorder                          | Past 12 months and past 3 months (current) |                                                                                             |
| Other Specified Feeding or Eating Disorder     | Past 12 months and past 3 months (current) |                                                                                             |
| <u>Somatic Symptom and Related Disorders</u>   |                                            |                                                                                             |
| Somatic Symptom Disorder                       | Past 6 months (current)                    | } X Exclusion (all groups)<br>IBS-related symptoms not included for IBS and comorbid groups |
| Illness Anxiety Disorder                       | Past 6 months (current)                    |                                                                                             |
| <u>Externalizing Disorders</u>                 |                                            |                                                                                             |
| Adult Attention-deficit Hyperactivity Disorder | Past 6 months (current)                    | } - Lifetime = Neither inclusion nor exclusion (MH and Comorbid)                            |
|                                                |                                            | X Lifetime = Exclusion (Controls and IBS)                                                   |
| <u>Trauma- and Stressor-Related Disorders</u>  |                                            |                                                                                             |
| Acute Stress Disorder                          | Past month (current)                       | } - Lifetime = Neither inclusion nor exclusion (MH and Comorbid)                            |
| Posttraumatic Stress Disorder                  | Lifetime and past month (current)          |                                                                                             |
| Adjustment Disorder                            | Past 6 months (current)                    |                                                                                             |

1  
2  
3  
4  
5  
6  
7  
8  
9  
10  
11  
12  
13  
14  
15  
16  
17  
18  
19  
20  
21  
22  
23  
24  
25  
26  
27  
28  
29  
30  
31  
32  
33  
34  
35  
36  
37  
38  
39  
40  
41  
42  
43  
44  
45  
46

---

| Disorder                                              | Duration assessed at interview    | Eligibility Status                        |
|-------------------------------------------------------|-----------------------------------|-------------------------------------------|
| Other Specified Trauma- and Stressor-Related Disorder | Lifetime and past month (current) | ✗ Lifetime = Exclusion (Controls and IBS) |

---

*Notes.* MH = mental health anxiety/depression group; Comorbid = comorbid IBS and anxiety/depression group; IBS = irritable bowel syndrome

For peer review only

## Description of the Modified Psychiatric Diagnostic Screening Questionnaire

The Psychiatric Diagnostic Screening Questionnaire (PDSQ) will be modified for the Bugs and Brains Study to screen for the likely presence/absence of mental health diagnoses that relate to the inclusion and exclusion criteria of this study, particularly Major Depressive Disorder, anxiety disorders, substance use disorders, psychotic symptoms, and somatic disorders

The PDSQ has been modified as follows:

- 6 items relating to suicidal ideation and behavior have been removed. Suicidal ideation and behavior will be assessed by a research assistant during the SCID-5-RV diagnostic interview in Phase 2, and in Phase 4 self-report questionnaires.
- Questions relating to Post-Traumatic Stress symptoms and Obsessive Compulsive behaviours will be excluded as information pertaining to these disorders is not required for inclusions/exclusion criteria.
- Additional questions relating to mania symptoms have been added to assess for likely diagnosis of Bipolar disorders.
- Two additional questions assessing Persistent Depressive Disorder were added.
- An additional question assessing Anorexia Nervosa was added.
- For each diagnostic category, a question assessing lifetime history of experience of several symptoms from that diagnostic category has been added.
