# Supplementary material for: Bugs and Brains, the Gut and Mental Health Study: a mixed-methods study investigating microbiota composition and function in anxiety, depression and irritable bowel syndrome
Source: PubMed Central journal article supplement — BMJ Open. 2021 Mar 15;11(3):e043221. doi: 10.1136/bmjopen-2020-043221 (PMC7970253; doi:10.1136/bmjopen-2020-043221), 2021-03-15
Supplement: bmjopen-2020-043221supp001.pdf [file bmjopen-2020-043221supp001.pdf]

**Table S1.** Disorders assessed by the modified SCID-5-RV utilised by the Bugs and Brains study

| Disorder                                             | Duration assessed at interview        | Eligibility Status                                                                                                                                       |
|------------------------------------------------------|---------------------------------------|----------------------------------------------------------------------------------------------------------------------------------------------------------|
| <u>Bipolar and related disorders</u>                 |                                       |                                                                                                                                                          |
| Bipolar I Disorder                                   | Lifetime and past month (current)     | } X Exclusion (all groups)                                                                                                                               |
| Bipolar II Disorder                                  | Lifetime and past month (current)     |                                                                                                                                                          |
| Cyclothymic Disorder                                 | Past 2 years (current)                |                                                                                                                                                          |
| Other Specified Bipolar Disorder                     | Lifetime and past month (current)     |                                                                                                                                                          |
| Bipolar Disorder Due to Another Medical Condition    | Lifetime and past month (current)     |                                                                                                                                                          |
| Substance/Medication-Induced Bipolar Disorder        | Lifetime and past month (current)     |                                                                                                                                                          |
| <u>Depressive disorders</u>                          |                                       |                                                                                                                                                          |
| Major Depressive Disorder                            | Lifetime and past month (current)     | } ✓ Current = Inclusion (MH and Comorbid)<br>- Lifetime = Neither inclusion nor exclusion (MH and Comorbid)<br>X Lifetime = Exclusion (Controls and IBS) |
| Persistent Depressive Disorder                       | Lifetime and past two years (current) |                                                                                                                                                          |
| Premenstrual Dysphoric Disorder                      | Past 12 months (current)              | } - Lifetime = Neither inclusion nor exclusion                                                                                                           |
| Other Specified Depressive Disorder                  | Lifetime and past month (current)     | } - Lifetime = Neither inclusion nor exclusion (MH and Comorbid)<br>X Lifetime = Exclusion (Controls and IBS)                                            |
| Depressive Disorder Due to Another Medical Condition | Lifetime and past month (current)     |                                                                                                                                                          |
| Substance/Medication-Induced Depressive Disorder     | Lifetime and past month (current)     |                                                                                                                                                          |
| <u>Schizophrenia and other psychotic disorders</u>   |                                       |                                                                                                                                                          |
| Clinical psychotic symptoms                          | Lifetime and current                  | } X Exclusion (all groups)                                                                                                                               |
| <u>Substance use disorders</u>                       |                                       |                                                                                                                                                          |
| Alcohol                                              | Past 12 months (current)              | } X Exclusion (all groups)                                                                                                                               |

| Disorder                                                                   | Duration assessed at interview         | Eligibility Status                                               |
|----------------------------------------------------------------------------|----------------------------------------|------------------------------------------------------------------|
| Sedative-Hypnotic-Anxiolytic                                               | Past 12 months (current)               | }                                                                |
| Cannabis                                                                   | Past 12 months (current)               |                                                                  |
| Stimulants/Cocaine                                                         | Past 12 months (current)               |                                                                  |
| Opioids                                                                    | Past 12 months (current)               |                                                                  |
| Phencyclidine (PCP)                                                        | Past 12 months (current)               |                                                                  |
| Other Hallucinogens                                                        | Past 12 months (current)               |                                                                  |
| Inhalants                                                                  | Past 12 months (current)               |                                                                  |
| Other/Unknown                                                              | Past 12 months (current)               |                                                                  |
| <u>Anxiety disorders</u>                                                   |                                        |                                                                  |
| Panic Disorder                                                             | Lifetime and past month (current)      | } ✓ Current = Inclusion (MH and Comorbid)                        |
| Agoraphobia                                                                | Lifetime and past six months (current) |                                                                  |
| Social Anxiety Disorder                                                    | Lifetime and past six months (current) |                                                                  |
| Generalized Anxiety Disorder                                               | Lifetime and past six months (current) |                                                                  |
| <hr/>                                                                      |                                        |                                                                  |
| Specific Phobia                                                            | Lifetime and past six months (current) | } - Lifetime = Neither inclusion nor exclusion (MH and Comorbid) |
| Other Specified Anxiety Disorder                                           | Lifetime and past month (current)      |                                                                  |
| Anxiety Disorder Due to Another Medical Condition                          | Lifetime and past month (current)      |                                                                  |
| Substance/Medication-Induced Anxiety Disorder                              | Lifetime and past month (current)      |                                                                  |
| <hr/>                                                                      |                                        |                                                                  |
| <u>Obsessive-compulsive and related disorders</u>                          |                                        |                                                                  |
| Obsessive Compulsive Disorder                                              | Lifetime and past month (current)      | } - Lifetime = Neither inclusion nor exclusion (MH and Comorbid) |
| Other Specified Obsessive Compulsive and Related Disorder                  | Lifetime and past month (current)      |                                                                  |
| Obsessive-Compulsive and Related Disorder Due to Another Medical Condition | Lifetime and past month (current)      |                                                                  |
| Substance/Medication-Induced Obsessive-Compulsive and Related Disorder     | Lifetime and past month (current)      |                                                                  |
| <hr/>                                                                      |                                        |                                                                  |
|                                                                            |                                        | } ✗ Lifetime = Exclusion (Controls and IBS)                      |

| Disorder                                       | Duration assessed at interview             | Eligibility Status                                                                                            |
|------------------------------------------------|--------------------------------------------|---------------------------------------------------------------------------------------------------------------|
| <u>Sleep-wake disorders</u>                    |                                            |                                                                                                               |
| Insomnia Disorder                              | Past three months (current)                | } - Lifetime = Neither inclusion nor exclusion (MH and Comorbid)<br>X Lifetime = Exclusion (Controls and IBS) |
| Hypersomnolence Disorder                       | Past three months (current)                |                                                                                                               |
| Substance-Induced Sleep Disorder               | Past three months (current)                |                                                                                                               |
| <u>Feeding and Eating Disorders</u>            |                                            |                                                                                                               |
| Anorexia Nervosa                               | Past 12 months and past 3 months (current) | } X Exclusion (all groups)                                                                                    |
| Bulimia Nervosa                                | Past 12 months and past 3 months (current) |                                                                                                               |
| Binge Eating Disorder                          | Past 12 months and past 3 months (current) |                                                                                                               |
| Other Specified Feeding or Eating Disorder     | Past 12 months and past 3 months (current) |                                                                                                               |
| <u>Somatic Symptom and Related Disorders</u>   |                                            |                                                                                                               |
| Somatic Symptom Disorder                       | Past 6 months (current)                    | } X Exclusion (all groups)<br>IBS-related symptoms not included for IBS and comorbid groups                   |
| Illness Anxiety Disorder                       | Past 6 months (current)                    |                                                                                                               |
| <u>Externalizing Disorders</u>                 |                                            |                                                                                                               |
| Adult Attention-deficit Hyperactivity Disorder | Past 6 months (current)                    | } - Lifetime = Neither inclusion nor exclusion (MH and Comorbid)<br>X Lifetime = Exclusion (Controls and IBS) |
| <u>Trauma- and Stressor-Related Disorders</u>  |                                            |                                                                                                               |
| Acute Stress Disorder                          | Past month (current)                       | } - Lifetime = Neither inclusion nor exclusion (MH and Comorbid)                                              |
| Posttraumatic Stress Disorder                  | Lifetime and past month (current)          |                                                                                                               |
| Adjustment Disorder                            | Past 6 months (current)                    |                                                                                                               |

---

| <b>Disorder</b>                                       | <b>Duration assessed at interview</b> | <b>Eligibility Status</b>                 |
|-------------------------------------------------------|---------------------------------------|-------------------------------------------|
| Other Specified Trauma- and Stressor-Related Disorder | Lifetime and past month (current)     | ✗ Lifetime = Exclusion (Controls and IBS) |

---

*Notes.* MH = mental health anxiety/depression group; Comorbid = comorbid IBS and anxiety/depression group; IBS = irritable bowel syndrome

## Description of the Modified Psychiatric Diagnostic Screening Questionnaire

The Psychiatric Diagnostic Screening Questionnaire (PDSQ) will be modified for the Bugs and Brains Study to screen for the likely presence/absence of mental health diagnoses that relate to the inclusion and exclusion criteria of this study, particularly Major Depressive Disorder, anxiety disorders, substance use disorders, psychotic symptoms, and somatic disorders

The PDSQ has been modified as follows:

- 6 items relating to suicidal ideation and behavior have been removed. Suicidal ideation and behavior will be assessed by a research assistant during the SCID-5-RV diagnostic interview in Phase 2, and in Phase 4 self-report questionnaires.
- Questions relating to Post-Traumatic Stress symptoms and Obsessive Compulsive behaviours will be excluded as information pertaining to these disorders is not required for inclusions/exclusion criteria.
- Additional questions relating to mania symptoms have been added to assess for likely diagnosis of Bipolar disorders.
- Two additional questions assessing Persistent Depressive Disorder were added.
- An additional question assessing Anorexia Nervosa was added.
- For each diagnostic category, a question assessing lifetime history of experience of several symptoms from that diagnostic category has been added.
